# Supplementary material for: Genetic Dissection and Quantitative Trait Loci Mapping of Agronomic and Fodder Quality Traits in Sorghum Under Different Water Regimes
Source: Front Plant Sci. 2022 Feb 17;13:810632. doi: 10.3389/fpls.2022.810632 (PMC8892184; doi:10.3389/fpls.2022.810632)
Supplement: Supplementary file 2 [file Table_1.XLSX]

## Sheet: Table_1
Table 1: Markers used while grouping and construction of linkage map
S1_78241954
S1_78241969
S1_27632761
S1_21091776
S1_78241999
S1_75545662
S1_55521094
S1_29051813
S1_29051660
S1_29051628
S1_29051667
S1_29051721
S1_2028318
S1_2028352
S1_17989235
S1_17989252
S1_25035644
S1_15370267
S1_15370308
S1_15370447
S1_4453944
S1_4453937
S1_8089574
S1_55237566
S1_17812681
S1_72403127
S1_57208377
S1_25490027
S1_29051678
S1_29051647
S1_57208401
S1_31764861
S1_31764878
S1_31764857
S1_31764863
S1_76284461
S1_73303058
S1_31760687
S1_17989231
S1_58852065
S1_58852088
S1_32817337
S1_25841156
S1_789658
S1_789671
S1_789659
S1_789688
S1_789700
S1_27632778
S1_79996636
S1_78396385
S1_77869564
S1_77657255
S1_76467936
S1_76023195
S1_76023167
S1_74613069
S1_74490535
S1_74475248
S1_73811826
S1_73791442
S1_71687167
S1_72056280
S1_71823042
S1_68834396
S1_67679522
S1_67191688
S1_67191691
S1_67073525
S1_66830103
S1_66894582
S1_66894583
S1_65725731
S1_65725783
S1_65256499
S1_65181092
S1_64479483
S1_64547158
S1_61373169
S1_61336147
S1_60811038
S1_59369684
S1_58834907
S1_57944966
S1_57419983
S1_57417687
S1_55817554
S1_55376924
S1_55049627
S1_55071240
S1_55302173
S1_55302187
S1_55302188
S1_53580519
S1_52223324
S1_32817476
S1_32817499
S1_31763971
S1_25305314
S1_25305330
S1_25305315
S1_19554744
S1_18844958
S1_14207660
S2_49777390
S2_49777423
S2_22390998
S2_34303932
S2_37294557
S2_35267463
S2_12721870
S2_32224095
S2_23357734
S2_21923225
S2_21156574
S2_25487548
S2_32224076
S2_54482133
S2_52687851
S2_56963302
S2_57265544
S2_58565145
S2_59425885
S2_59949625
S2_59949665
S2_59949663
S2_60096135
S2_60347236
S2_61411614
S2_61453155
S2_62052157
S2_62052172
S2_63059339
S2_63140346
S2_63676003
S2_63807182
S2_63806993
S2_64461211
S2_64671795
S2_65853422
S2_66074828
S2_66319995
S2_69466187
S2_69068634
S2_70395187
S2_70384142
S2_71485265
S2_71704739
S2_73833034
S2_74276038
S2_74869400
S2_75784352
S2_76750671
S2_73644245
S2_73644242
S2_35267470
S2_34303938
S2_22391027
S2_27215310
S2_27215320
S2_35012810
S2_75430833
S2_54223920
S2_8797039
S2_54481983
S2_33916784
S2_22391018
S2_22390989
S2_3127055
S2_3127076
S2_3127026
S2_35267464
S2_3127033
S2_3127072
S2_37294592
S2_35267484
S2_59600120
S2_41900016
S2_41900034
S2_41900067
S2_72367889
S2_49777439
S2_37294582
S2_33933354
S2_37294566
S2_49777405
S2_37294588
S2_60347207
S2_60347216
S2_22391028
S2_43213823
S2_56757208
S2_43213849
S2_8884495
S2_7659353
S2_4271638
S2_4271695
S2_3918445
S2_3754312
S2_3754343
S2_3738983
S2_2036820
S2_630207
S2_470439
S2_470437
S3_880431
S3_880457
S3_880442
S3_710878
S3_414033
S3_70079391
S3_70079381
S3_70079355
S3_70079354
S3_26562573
S3_34959065
S3_34599629
S3_36005243
S3_36005219
S3_36005209
S3_1340262
S3_1340358
S3_1340316
S3_36005223
S3_68961146
S3_33963143
S3_14775747
S3_14775724
S3_14775730
S3_7702108
S3_45904562
S3_5793786
S3_6001202
S3_5945619
S3_4757131
S3_5061189
S3_5061152
S3_5509796
S3_6609236
S3_7132713
S3_7202450
S3_7370066
S3_7510932
S3_7964448
S3_9798248
S3_13653184
S3_19680811
S3_19716825
S3_16628925
S3_51838810
S3_51838770
S3_51838824
S3_51838794
S3_52994987
S3_56070788
S3_56070783
S3_56858901
S3_56957813
S3_56977228
S3_56977223
S3_57244330
S3_58746245
S3_60260671
S3_60789109
S3_61565073
S3_61722531
S3_61722545
S3_62430521
S3_63284406
S3_63284401
S3_64874095
S3_66085433
S3_66708552
S3_67843252
S3_68405491
S3_68840917
S3_68949414
S3_69651554
S3_70152880
S3_70463489
S3_70463459
S3_70885077
S3_70885062
S3_71372606
S3_71553771
S3_71717497
S3_72118504
S3_72384125
S3_73300617
S3_73447309
S3_73487684
S3_73844392
S3_73845516
S3_27804678
S3_27804677
S3_27804657
S3_40294562
S3_34601486
S3_40427856
S3_40427843
S3_36005196
S3_34599612
S3_34959079
S3_34233090
S3_59083460
S3_59083457
S3_34599588
S3_34599600
S3_34599528
S3_36005248
S3_36005234
S3_9200259
S3_9200289
S3_9200257
S3_9200303
S3_34232053
S3_40237710
S3_40237706
S3_40237681
S3_16989416
S3_35729869
S3_35729896
S3_20546717
S3_20546718
S3_20546725
S3_40237702
S3_22848731
S3_40237666
S3_27801168
S3_27801165
S3_27801177
S3_51675907
S3_51675906
S3_21813881
S3_16989399
S3_33961119
S3_33961098
S3_36005235
S3_31167605
S3_10532821
S4_51984597
S4_23830427
S4_67109048
S4_67014076
S4_66317876
S4_65793086
S4_64390694
S4_63932696
S4_63763955
S4_63356553
S4_62985826
S4_62909168
S4_62909177
S4_62599717
S4_62462834
S4_62188721
S4_61960378
S4_62026737
S4_60269679
S4_59539080
S4_59500521
S4_56507360
S4_56507361
S4_56425879
S4_56330982
S4_56147401
S4_54228505
S4_54228475
S4_54228509
S4_53671341
S4_53280973
S4_53280964
S4_52473484
S4_52500456
S4_52473624
S4_51772248
S4_51738153
S4_50669747
S4_50305079
S4_16500155
S4_12486717
S4_15606925
S4_8841820
S4_8841852
S4_9669495
S4_9669498
S4_9649295
S4_9649301
S4_26346886
S4_19691416
S4_26379030
S4_28381768
S4_23830452
S4_26346900
S4_26378800
S4_26379041
S4_26378809
S4_26378830
S4_26389560
S4_64243304
S4_64243300
S4_64243302
S4_64243316
S4_64243314
S4_64243291
S4_64243305
S4_64243319
S4_58074660
S4_58074659
S4_64243306
S4_64243292
S4_48336254
S4_48336221
S4_64243280
S4_6188606
S4_66691004
S4_26389555
S4_26378820
S4_26378787
S4_26378773
S4_23830457
S4_34749685
S4_55229969
S4_2317295
S4_2317264
S4_1725066
S4_1980923
S4_1320568
S4_4807446
S4_5437817
S4_5782715
S4_6015515
S4_6334681
S4_6491914
S4_7385262
S4_39817417
S4_39817430
S4_26389564
S4_26389623
S4_28381735
S4_12775655
S4_26346902
S4_26346917
S4_23830439
S4_26389634
S4_48047109
S5_58482169
S5_16427850
S5_64686360
S5_2111269
S5_2111245
S5_949160
S5_64686361
S5_47204029
S5_47204073
S5_47204089
S5_46113241
S5_47204054
S5_47204052
S5_47204087
S5_1417378
S5_2403643
S5_48180816
S5_62068510
S5_55163975
S5_55163592
S5_46523483
S5_47240381
S5_26276597
S5_47971325
S5_47057455
S5_46698954
S5_46698921
S5_47169462
S5_57273006
S5_46113240
S5_27872449
S5_46523443
S5_46523482
S5_46698916
S5_46698922
S5_46698946
S5_46906090
S5_36346888
S5_57273018
S5_47240399
S5_46906100
S5_46906104
S5_57272975
S5_57272979
S5_57272989
S5_57272968
S5_47204036
S5_47204063
S5_34955220
S5_34955248
S5_47823277
S5_46698907
S5_47240396
S5_47823311
S5_57272960
S5_13323599
S5_46113236
S5_46113245
S5_47823300
S5_65339497
S5_65339495
S5_65339493
S5_47823286
S5_45547205
S5_45547193
S5_46523414
S5_46698906
S5_27872439
S5_27872452
S5_26522666
S5_26522691
S5_26893103
S5_4512565
S5_8091188
S5_8122028
S5_6991342
S5_9500870
S5_11115011
S5_11323973
S5_12536144
S5_12857914
S5_18753551
S5_30911232
S5_53889386
S5_62380037
S5_62068513
S5_62068470
S5_2111222
S5_65538964
S5_46523485
S5_46523501
S5_9286117
S5_46698948
S5_46862944
S5_27872456
S5_27872457
S5_67287071
S5_69618036
S5_69618013
S5_69618007
S5_69617967
S5_71727225
S5_71293302
S5_71293266
S5_70610868
S5_70610874
S5_70610613
S5_70281107
S5_69718748
S5_69725796
S5_68641943
S5_66052168
S5_64932390
S5_65095746
S5_65095758
S5_65197895
S5_65538976
S5_16427852
S5_2111278
S5_2111275
S5_3025910
S5_1225703
S6_6051629
S6_6051634
S6_8316588
S6_8316562
S6_56641346
S6_47652072
S6_23665583
S6_6051626
S6_35704459
S6_28153390
S6_28153353
S6_28153352
S6_40259660
S6_40259669
S6_43998485
S6_8316605
S6_8316563
S6_23665594
S6_22508233
S6_37475956
S6_21241468
S6_22508212
S6_21992642
S6_21992643
S6_46045986
S6_46046022
S6_23665524
S6_22638494
S6_60401033
S6_22638487
S6_45517822
S6_21443768
S6_31051557
S6_21443747
S6_31051882
S6_31051598
S6_43484951
S6_42607536
S6_42607550
S6_22508190
S6_22508243
S6_40259710
S6_22028121
S6_17987635
S6_43484942
S6_31051496
S6_31051609
S6_42498667
S6_22028114
S6_264604
S6_40259678
S6_40259699
S6_23266497
S6_23266533
S6_22028092
S6_22028130
S6_40831108
S6_37475958
S6_37475936
S6_2710974
S6_2710925
S6_2710926
S6_2710956
S6_2193049
S6_3199668
S6_3888403
S6_3980114
S6_3980119
S6_38026772
S6_7661049
S6_11642206
S6_10574950
S6_19148640
S6_29513062
S6_29513042
S6_43252501
S6_43992662
S6_44605496
S6_45061366
S6_45061372
S6_46046221
S6_47268476
S6_47104819
S6_47793535
S6_48291365
S6_48782367
S6_49220919
S6_49170717
S6_49447871
S6_49675644
S6_49680962
S6_49676343
S6_49676345
S6_51991776
S6_52691101
S6_52884464
S6_53739276
S6_54442988
S6_54656837
S6_54737817
S6_55260501
S6_55690184
S6_55690159
S6_55898389
S6_55898365
S7_58885598
S7_23375323
S7_59773786
S7_61677437
S7_49831231
S7_49831203
S7_51760087
S7_58749617
S7_58749595
S7_58749594
S7_51760083
S7_49831218
S7_31212791
S7_49831210
S7_539696
S7_539715
S7_539741
S7_539718
S7_12221361
S7_57835476
S7_58885610
S7_51760096
S7_31212828
S7_59442504
S7_48899173
S7_59773789
S7_61989296
S7_51760097
S7_64449016
S7_64448998
S7_64448970
S7_24369010
S7_20604632
S7_20604615
S7_20604613
S7_31212809
S7_539726
S7_2491861
S7_2559963
S7_3006241
S7_3195049
S7_3213717
S7_4048892
S7_5062356
S7_5813728
S7_5531357
S7_5531348
S7_5467628
S7_14230022
S7_39535613
S7_32004530
S7_54709064
S7_54709063
S7_54699104
S7_56368290
S7_57555393
S7_57598884
S7_57847730
S7_58155350
S7_58298411
S7_58298410
S7_58298409
S7_58749815
S7_58775082
S7_58712635
S7_58694851
S7_59366675
S7_62915731
S7_62957154
S7_62957153
S7_62957152
S7_63088145
S7_63503859
S7_63709143
S7_63709136
S7_63949223
S7_64026387
S7_64026378
S7_64859034
S7_64862229
S7_65050134
S8_452946
S8_2064184
S8_2392950
S8_2392991
S8_2392981
S8_3110973
S8_5976722
S8_14086203
S8_47690633
S8_47690032
S8_50357776
S8_53915266
S8_54446151
S8_56504331
S8_56504352
S8_57441797
S8_58462039
S8_58562223
S8_58901767
S8_60002405
S8_61064304
S8_61176187
S8_62498687
S8_38978320
S8_38978319
S8_60001318
S8_15618657
S8_29313174
S8_33345749
S8_26054948
S8_1688979
S8_2393145
S8_2393148
S8_17889951
S8_57305167
S8_57305166
S8_44419228
S8_44419233
S8_44419217
S8_44419197
S8_42989561
S8_44917202
S8_42989562
S8_29389206
S8_44202259
S8_38978294
S8_36037732
S8_26661497
S8_41507698
S8_17888402
S8_4132769
S8_26054940
S8_60200087
S8_32872655
S8_60001326
S8_60001675
S8_60001721
S8_62498647
S8_62498642
S8_26054973
S8_26054966
S8_54415383
S8_32872710
S8_32872662
S8_26661542
S8_17888441
S8_17888430
S8_25466813
S8_25466788
S8_38978333
S8_38978291
S8_26054964
S8_26054960
S8_26054955
S8_8437534
S8_8437543
S8_8437542
S9_58168693
S9_58168659
S9_58168662
S9_58168700
S9_58168660
S9_58168654
S9_27388955
S9_17562362
S9_26419553
S9_7928007
S9_7928037
S9_7928051
S9_17562404
S9_56497595
S9_43769845
S9_59382507
S9_59382471
S9_59382460
S9_1594306
S9_1594309
S9_43769851
S9_30847890
S9_30847898
S9_20408994
S9_20408997
S9_43769827
S9_43769833
S9_43769852
S9_7283339
S9_7283341
S9_7283340
S9_43769835
S9_43769836
S9_30847919
S9_30847895
S9_30847903
S9_53010283
S9_53010284
S9_30847885
S9_42259267
S9_23769192
S9_23769206
S9_23769216
S9_30847923
S9_14996839
S9_14996846
S9_14996824
S9_5442539
S9_5442491
S9_1475137
S9_1475079
S9_30847905
S9_53717414
S9_53717398
S9_30847925
S9_30847887
S9_58539611
S9_58761955
S9_59132487
S9_57060024
S9_56496657
S9_56496663
S9_56407149
S9_56407154
S9_55948381
S9_55948419
S9_55077354
S9_54901513
S9_54650137
S9_54564310
S9_54242938
S9_54242937
S9_53950760
S9_53536151
S9_52479968
S9_52461655
S9_51967826
S9_50741975
S9_50741996
S9_50673039
S9_50538325
S9_50538301
S9_50538298
S9_50006335
S9_45262365
S9_42359262
S9_11644995
S9_11640379
S9_8900119
S9_4267920
S9_4377961
S9_3329619
S9_2969647
S9_1604801
S9_1601318
S9_1551051
S9_84468
S10_38367791
S10_38367814
S10_53683489
S10_36830752
S10_37927053
S10_53711329
S10_22574335
S10_36830781
S10_51744430
S10_51744457
S10_37104447
S10_37104470
S10_47036226
S10_53509513
S10_42448727
S10_42448780
S10_6919731
S10_42251171
S10_42251177
S10_58333925
S10_38703418
S10_19546251
S10_19546241
S10_46813508
S10_47036235
S10_10828428
S10_10828410
S10_10541181
S10_37927065
S10_2507375
S10_35349312
S10_38703416
S10_32329908
S10_33566358
S10_12716847
S10_12716863
S10_35503619
S10_10828458
S10_10828457
S10_11963644
S10_11963623
S10_43068615
S10_11963667
S10_29012477
S10_29012457
S10_56299597
S10_56299603
S10_56337814
S10_57181179
S10_58323275
S10_58553403
S10_58437817
S10_58931104
S10_58931102
S10_59355959
S10_59355948
S10_60706797
S10_60920070
S10_54687807
S10_54444614
S10_54444615
S10_54444616
S10_54444617
S10_54444619
S10_54053415
S10_53486444
S10_53486445
S10_52520639
S10_52520641
S10_52520636
S10_52520637
S10_52520638
S10_52323643
S10_52030111
S10_50376301
S10_50376307
S10_50915964
S10_47723364
S10_46334121
S10_42831404
S10_24403949
S10_12810290
S10_12810289
S10_11064990
S10_11581231
S10_10483314
S10_8750642
S10_8167236
S10_7790079
S10_7865192
S10_7820187
S10_7249495
S10_7288565
S10_7521634
S10_6530980
S10_6529740
S10_6011796
S10_5175156
S10_4620536
S10_3169867
S10_1799198
S10_17051342
S10_50947148
S10_10828402

## Sheet: Table_2
Table 2: Additive effect for all 11 traits under both treatment and across years (294)
Chr	Position	LeftMarker	RightMarker	LOD	PVE(%)	Add	LeftCI		RightCI
DFL_C
1	316.989	S1_76023167	S1_74613069	5.459	3.3603	1.0744	316.489		318.489
1	386.989	S1_61336147	S1_60811038	3.412	1.9411	0.8193	383.489		388.489
4	102.246	S4_62599717	S4_62462834	7.847	4.761	1.3086	100.746		102.746
4	144.246	S4_52500456	S4_52473624	5.6607	3.2778	-1.0672	143.746		146.746
5	186.465	S5_47204063	S5_34955220	3.044	2.2696	1.3718	185.965		186.965
6	127.9	S6_37475936	S6_2710974	3.8886	2.308	0.9001	125.4		137.4
7	289.963	S7_63949223	S7_64026387	12.7111	8.0346	1.6612	289.463		290.463
8	57.5319	S8_47690032	S8_50357776	4.3219	4.4638	1.2707	57.0319		58.0319
9	332.342	S9_50538298	S9_50006335	2.9331	1.6709	-0.7602	331.842		334.842
10	277.376	S10_52030111	S10_50376301	6.5939	10.4678	-1.8968	276.876		277.876
10	287.376	S10_42831404	S10_24403949	6.6571	3.9064	1.1584	286.876		287.876
PH_C
2	39.1366	S2_23357734	S2_21923225	2.6202	2.9025	-4.9158	37.6366		39.6366
3	233.087	S3_62430521	S3_63284406	2.5916	1.6194	3.672	232.587		233.587
4	286.246	S4_6334681	S4_6491914	3.4703	1.9757	-4.053	280.746		292.746
7	258.963	S7_58694851	S7_59366675	21.6116	16.1364	-11.6228	258.463		259.463
7	235.963	S7_54699104	S7_56368290	24.3187	13.4521	10.7434	234.463		237.463
7	254.963	S7_58694851	S7_59366675	20.2821	12.6476	10.3627	254.463		255.463
7	242.963	S7_56368290	S7_57555393	4.3601	3.3989	-5.3167	242.463		243.463
8	76.5319	S8_54446151	S8_56504331	4.905	2.6251	4.6716	74.0319		81.0319
10	303.376	S10_8750642	S10_8167236	4.5951	7.0873	7.6809	302.876		303.876
10	75.3759	S10_36830781	S10_51744430	6.5687	4.7795	6.4264	72.8759		77.8759
10	197.376	S10_58931102	S10_59355959	4.7527	2.2413	4.3261	195.876		197.876
FW_C
6	119.9	S6_40259678	S6_40259699	2.6465	4.2127	-71.9466	118.4		120.4
7	259.963	S7_59366675	S7_62915731	12.287	21.0392	-91.7488	258.463		262.463
7	254.963	S7_58694851	S7_59366675	4.6527	8.0089	56.8892	254.463		255.463
7	235.963	S7_54699104	S7_56368290	3.8387	6.0515	49.7237	233.463		238.463
DW_C
3	232.087	S3_62430521	S3_63284406	5.2917	7.2223	-24.5197	231.587		232.587
3	268.087	S3_71553771	S3_71717497	2.9981	2.0823	-13.1141	267.587		269.587
7	259.963	S7_59366675	S7_62915731	12.8417	9.9757	-28.8466	259.463		262.463
7	234.963	S7_54699104	S7_56368290	8.8109	6.6145	23.7041	233.463		237.463
7	242.963	S7_56368290	S7_57555393	5.1854	5.3428	-20.9935	242.463		243.463
7	254.963	S7_58694851	S7_59366675	6.8386	5.2771	21.0842	254.463		255.463
GW_C
7	234.963	S7_54699104	S7_56368290	6.0433	6.8677	-13.254	233.463		238.463
7	180.963	S7_539726	S7_2491861	4.2292	6.1611	12.3548	177.463		183.463
NDM_C
3	113.087	S3_14775730	S3_7702108	3.0411	4.8274	0.0131	108.587		118.587
7	232.963	S7_54709063	S7_54699104	4.5534	5.6423	-0.01	232.463		235.463
NDF_C
2	59.1366	S2_59425885	S2_59949625	5.6021	6.1282	-0.2003	57.6366		62.6366
2	54.1366	S2_58565145	S2_59425885	4.6988	4.8948	0.1804	53.6366		54.6366
3	108.087	S3_33963143	S3_14775747	3.1477	3.6615	-0.2162	102.587		108.587
6	237.9	S6_51991776	S6_52691101	3.1941	3.3146	-0.1453	232.4		241.4
ADF_C
2	59.1366	S2_59425885	S2_59949625	4.4868	5.375	-0.1481	57.6366		62.6366
5	324.465	S5_68641943	S5_66052168	3.2195	6.7415	-0.1644	317.965		328.965
5	359.465	S5_65538976	S5_16427852	4.1337	4.8588	0.1417	351.965		367.965
10	294.376	S10_11581231	S10_10483314	3.281	3.887	-0.1261	291.876		299.876
ADL_C
2	262.137	S2_3127026	S2_35267464	2.5516	3.6962	-0.0406	260.637		262.637
3	76.0871	S3_36005209	S3_1340262	2.5195	4.9725	0.019	75.5871		77.5871
5	359.465	S5_65538976	S5_16427852	4.0901	5.3448	0.02	355.965		369.965
8	43.5319	S8_3110973	S8_5976722	3.3912	5.6107	0.0201	39.0319		52.0319
ME_C
2	59.1366	S2_59425885	S2_59949625	4.5409	5.3202	0.0224	57.6366		61.6366
5	331.465	S5_68641943	S5_66052168	2.6988	5.819	0.0231	325.965		340.965
10	288.376	S10_24403949	S10_12810290	2.8788	3.3251	0.0176	286.876		288.876
IVOMD_C
2	58.1366	S2_58565145	S2_59425885	3.3245	5.931	0.1249	56.6366		61.6366
5	358.465	S5_65197895	S5_65538976	2.824	3.8599	-0.1023	350.965		369.965
10	288.376	S10_24403949	S10_12810290	2.6134	3.5774	0.0976	286.876		288.876
DFL_S
1	315.989	S1_76467936	S1_76023195	4.0678	2.6806	-1.0025	314.489		316.489
1	203.989	S1_17989252	S1_25035644	2.8128	2.0771	-0.9052	197.489		207.489
2	59.1366	S2_59425885	S2_59949625	6.0476	4.2378	1.273	57.6366		61.6366
3	229.087	S3_61565073	S3_61722531	2.97	1.9177	0.8549	227.587		229.587
6	130.9	S6_37475936	S6_2710974	4.1004	3.7022	1.1822	126.4		140.4
7	287.963	S7_63503859	S7_63709143	7.1022	6.5971	1.5725	287.463		288.463
7	285.963	S7_63503859	S7_63709143	4.8949	4.1986	-1.2534	285.463		286.463
7	259.963	S7_59366675	S7_62915731	3.5139	2.3645	-0.946	258.463		264.463
7	254.963	S7_58694851	S7_59366675	3.1184	2.0144	0.8769	254.463		255.463
10	184.376	S10_56337814	S10_57181179	2.8446	6.5683	1.5705	182.876		184.876
10	288.376	S10_24403949	S10_12810290	8.4647	5.9726	1.4942	286.876		288.876
10	299.376	S10_10483314	S10_8750642	6.2726	4.7891	1.3668	296.876		301.876
PH_S
1	347.989	S1_67679522	S1_67191688	3.4612	6.1674	7.9337	344.489		348.489
6	186.9	S6_43252501	S6_43992662	3.7615	2.2987	-4.8445	186.4		187.4
7	236.963	S7_56368290	S7_57555393	25.5667	16.8542	13.3448	235.463		237.463
7	258.963	S7_58694851	S7_59366675	19.0995	16.5887	-13.0633	258.463		259.463
7	254.963	S7_58694851	S7_59366675	13.2927	9.3299	9.8631	254.463		255.463
7	242.963	S7_56368290	S7_57555393	6.1443	5.9953	-7.8246	242.463		243.463
10	195.376	S10_58437817	S10_58931104	4.5479	2.6544	5.2265	194.876		195.876
FW_S
6	119.9	S6_40259678	S6_40259699	3.6287	2.8778	-88.4781	119.4		120.4
7	259.963	S7_59366675	S7_62915731	12.2327	10.578	-96.8661	259.463		262.463
7	242.963	S7_56368290	S7_57555393	8.3972	9.4444	-91.0316	242.463		244.463
7	254.963	S7_58694851	S7_59366675	7.5115	6.4258	75.8766	254.463		255.463
7	236.963	S7_56368290	S7_57555393	7.2849	6.0443	74.0587	236.463		237.463
10	156.376	S10_33566358	S10_12716847	3.1873	3.0223	54.2214	154.876		156.876
DW_S
7	259.963	S7_59366675	S7_62915731	7.7864	9.5417	-21.8684	258.463		263.463
7	229.963	S7_39535613	S7_32004530	4.8248	5.4453	16.5154	228.463		230.463
7	82.9627	S7_12221361	S7_57835476	3.1299	4.8877	-15.663	81.4627		85.4627
7	42.9627	S7_23375323	S7_59773786	3.622	4.4815	14.9165	37.4627		47.4627
7	254.963	S7_58694851	S7_59366675	3.1707	3.8123	13.8917	254.463		255.463
10	188.376	S10_57181179	S10_58323275	3.1218	3.9401	14.1262	187.876		192.876
GW_S
4	78.2459	S4_67014076	S4_66317876	3.5632	6.8342	-16.9561	75.7459		78.7459
8	9.5319	S8_452946	S8_2064184	3.5055	3.7792	12.4977	7.0319		14.0319
8	56.5319	S8_14086203	S8_47690633	2.7906	1.6513	-8.2616	56.0319		57.0319
NDM_S
2	110.137	S2_69466187	S2_69068634	2.9963	3.4709	0.0062	109.637		113.637
6	237.9	S6_51991776	S6_52691101	2.5242	2.8844	0.0057	231.4		241.4
7	250.963	S7_58298409	S7_58749815	9.856	13.1739	0.0122	249.463		254.463
NDF_S
1	335.989	S1_71687167	S1_72056280	3.2987	3.6944	0.1546	334.489		336.489
2	297.137	S2_43213849	S2_8884495	5.8302	5.9265	0.1936	290.637		300.637
2	74.1366	S2_61453155	S2_62052157	4.8533	5.1568	-0.1848	72.6366		74.6366
2	121.137	S2_71485265	S2_71704739	4.9607	4.1562	-0.1634	118.637		121.637
5	357.465	S5_65197895	S5_65538976	3.8144	3.6944	0.1556	351.965		364.965
5	141.465	S5_1417378	S5_2403643	2.5585	3.5405	0.1498	135.965		146.965
7	186.963	S7_2559963	S7_3006241	4.6461	4.0792	-0.1582	184.463		188.463
8	17.5319	S8_2392981	S8_3110973	4.9239	6.2343	-0.1988	16.0319		19.0319
8	187.532	S8_57305166	S8_44419228	4.8761	4.4641	-0.1717	186.032		188.032
ADF_S
2	73.1366	S2_61411614	S2_61453155	3.4921	5.8489	-0.1253	72.6366		74.6366
2	120.137	S2_70384142	S2_71485265	3.1412	5.4376	-0.1208	117.637		121.637
2	299.137	S2_43213849	S2_8884495	3.2689	5.3919	0.1205	292.637		300.637
ADL_S
1	361.989	S1_64479483	S1_64547158	4.475	4.4285	0.0205	361.489		370.489
2	299.137	S2_43213849	S2_8884495	3.9169	3.8825	0.0192	293.637		300.637
3	270.087	S3_72118504	S3_72384125	2.702	6.7539	0.0252	267.587		270.587
ME_S
1	361.989	S1_64479483	S1_64547158	5.9324	5.1281	-0.0241	359.489		362.489
2	297.137	S2_43213849	S2_8884495	5.5949	5.8073	-0.0255	291.637		300.637
2	113.137	S2_69068634	S2_70395187	4.203	4.2111	-0.0217	110.637		115.637
6	179.9	S6_29513042	S6_43252501	2.6968	2.4791	-0.0167	179.4		181.4
7	245.963	S7_57598884	S7_57847730	5.0686	4.5168	0.0228	245.463		246.463
8	15.5319	S8_2064184	S8_2392950	3.0123	5.2979	-0.0245	15.0319		16.0319
8	187.532	S8_57305166	S8_44419228	3.9553	3.5998	0.0205	186.032		188.032
IVOMD_S
1	353.989	S1_66894583	S1_65725731	6.0571	6.4722	-0.1447	353.489		354.489
2	73.1366	S2_61411614	S2_61453155	2.6582	2.7738	0.0939	72.6366		74.6366
2	121.137	S2_71485265	S2_71704739	2.6914	2.6967	0.0932	118.637		121.637
8	17.5319	S8_2392981	S8_3110973	5.5075	8.6295	0.1658	16.0319		19.0319
8	187.532	S8_57305166	S8_44419228	2.9939	3.3131	0.1034	186.032		188.032
DFL_16_C
1	317.989	S1_76023167	S1_74613069	3.654	6.4013	1.2317	316.489		320.489
2	40.1366	S2_21156574	S2_25487548	4.5024	5.9128	-1.1884	39.6366		40.6366
4	102.246	S4_62599717	S4_62462834	2.8089	3.3181	0.9081	99.7459		102.746
7	289.963	S7_63949223	S7_64026387	6.1056	7.5863	1.3406	289.463		290.463
10	287.376	S10_42831404	S10_24403949	3.9466	4.6309	1.0478	286.876		287.876
10	278.376	S10_52030111	S10_50376301	3.136	4.161	0.9927	277.876		278.876
PH_16_C
7	236.963	S7_56368290	S7_57555393	8.9749	5.9952	8.9929	234.463		238.463
7	259.963	S7_59366675	S7_62915731	6.7141	4.5786	-7.7696	258.463		262.463
7	254.963	S7_58694851	S7_59366675	4.8265	3.1768	6.5042	254.463		255.463
9	326.342	S9_51967826	S9_50741975	2.8563	8.2145	10.3499	324.842		327.842
10	303.376	S10_8750642	S10_8167236	3.4067	7.8573	10.1333	302.876		303.876
FW_16_C
5	309.465	S5_70610874	S5_70610613	2.5988	4.4172	59.9379	308.965		310.965
7	259.963	S7_59366675	S7_62915731	7.3237	13.6983	-106.098	258.463		264.463
7	254.963	S7_58694851	S7_59366675	3.134	5.7069	68.8293	254.463		255.463
7	43.9627	S7_23375323	S7_59773786	3.0251	5.1315	64.6753	39.4627		47.4627
DW_16_C
7	259.963	S7_59366675	S7_62915731	4.6207	6.6842	-25.6908	258.463		264.463
7	245.963	S7_57598884	S7_57847730	3.9338	5.8404	24.2081	245.463		247.463
7	43.9627	S7_23375323	S7_59773786	2.6941	3.6419	18.8855	37.4627		47.4627
7	254.963	S7_58694851	S7_59366675	2.5831	3.6249	19.0139	254.463		255.463
GW_16_C
7	235.963	S7_54699104	S7_56368290	2.9549	4.4488	-11.1275	233.463		239.463
NDF_16_C
2	59.1366	S2_59425885	S2_59949625	11.7745	10.4947	-0.4411	57.6366		60.6366
2	54.1366	S2_58565145	S2_59425885	9.2354	8.023	0.3866	53.6366		54.6366
8	102.532	S8_58462039	S8_58562223	2.8225	2.2691	-0.2022	99.0319		105.032
9	375.342	S9_8900119	S9_4267920	2.9729	2.4042	-0.2083	368.842		377.842
10	287.376	S10_42831404	S10_24403949	3.6479	2.931	-0.2306	286.876		288.876
ADF_16_C
1	294.989	S1_79996636	S1_78396385	3.0031	3.2292	0.1828	286.489		302.489
2	59.1366	S2_59425885	S2_59949625	7.47	7.61	-0.2828	57.6366		61.6366
2	54.1366	S2_58565145	S2_59425885	4.2621	4.3096	0.2135	53.6366		54.6366
10	299.376	S10_10483314	S10_8750642	5.7633	6.2804	-0.2597	295.876		301.876
10	46.3759	S10_36830752	S10_37927053	2.8235	3.3123	0.1919	44.8759		51.8759
ADL_16_C
2	59.1366	S2_59425885	S2_59949625	6.5655	4.8302	-0.0386	57.6366		61.6366
2	54.1366	S2_58565145	S2_59425885	2.814	2.0268	0.0251	53.6366		54.6366
8	44.5319	S8_3110973	S8_5976722	4.8186	4.123	0.0353	41.0319		45.0319
8	24.5319	S8_3110973	S8_5976722	4.0376	3.7442	-0.0339	24.0319		27.0319
10	301.376	S10_10483314	S10_8750642	4.1517	2.8602	-0.0303	296.876		301.876
ME_16_C
2	59.1366	S2_59425885	S2_59949625	7.1617	6.9323	0.0393	57.6366		60.6366
2	54.1366	S2_58565145	S2_59425885	2.9779	2.8503	-0.0253	53.6366		54.6366
7	129.963	S7_20604613	S7_31212809	3.0009	3.8005	0.0287	124.463		141.463
10	301.376	S10_10483314	S10_8750642	4.4199	3.994	0.0304	296.876		302.876
IVOMD_16_C
2	58.1366	S2_58565145	S2_59425885	5.744	8.0991	0.2431	57.6366		60.6366
5	249.465	S5_62380037	S5_62068513	2.701	2.9946	-0.1472	245.965		251.965
7	129.963	S7_20604613	S7_31212809	2.9539	4.3218	0.1761	124.463		141.463
10	300.376	S10_10483314	S10_8750642	5.0472	5.5469	0.2048	295.876		302.876
DFL_16_S
2	40.1366	S2_21156574	S2_25487548	4.7853	5.6605	-1.6389	39.6366		40.6366
6	130.9	S6_37475936	S6_2710974	3.3691	4.8693	1.5226	128.4		141.4
7	288.963	S7_63709136	S7_63949223	3.1622	3.2808	1.2447	288.463		290.463
10	288.376	S10_24403949	S10_12810290	10.409	11.7208	2.3506	287.876		288.876
PH_16_S
7	236.963	S7_56368290	S7_57555393	16.0691	14.2151	14.7237	234.463		237.463
7	259.963	S7_59366675	S7_62915731	9.4941	8.3284	-11.1407	258.463		263.463
7	242.963	S7_56368290	S7_57555393	3.8758	4.854	-8.4595	242.463		243.463
7	254.963	S7_58694851	S7_59366675	4.5074	3.8883	7.6502	254.463		255.463
10	195.376	S10_58437817	S10_58931104	4.196	3.5725	7.2867	194.876		195.876
FW_16_S
7	259.963	S7_59366675	S7_62915731	11.2383	10.557	-162.804	258.463		262.463
7	234.963	S7_54699104	S7_56368290	7.1285	6.6295	130.21	233.463		237.463
7	254.963	S7_58694851	S7_59366675	6.0492	5.6354	119.552	254.463		255.463
7	242.963	S7_56368290	S7_57555393	3.983	4.9171	-110.511	242.463		243.463
DW_16_S
7	259.963	S7_59366675	S7_62915731	6.7905	7.4487	-33.0169	258.463		263.463
7	229.963	S7_39535613	S7_32004530	5.436	5.5612	28.5232	228.463		230.463
7	254.963	S7_58694851	S7_59366675	3.6606	3.9045	24.027	254.463		255.463
7	44.9627	S7_59773786	S7_61677437	3.0779	3.6541	23	44.4627		49.4627
7	148.963	S7_31212809	S7_539726	2.7324	3.5174	23.4284	146.463		161.463
GW_16_S
4	76.2459	S4_67109048	S4_67014076	3.8326	4.966	-13.7533	75.7459		77.7459
NDM_16_S
2	101.137	S2_65853422	S2_66074828	2.8023	3.6165	-0.0078	97.6366		101.637
7	251.963	S7_58298409	S7_58749815	10.5768	15.1827	0.016	249.463		253.463
NDF_16_S
1	335.989	S1_71687167	S1_72056280	3.8621	4.4657	0.2184	334.489		336.489
2	120.137	S2_70384142	S2_71485265	10.3108	9.3436	-0.316	118.637		121.637
2	299.137	S2_43213849	S2_8884495	4.926	4.1222	0.2099	290.637		300.637
4	143.246	S4_53280964	S4_52473484	3.4336	4.0993	-0.2105	142.746		143.746
5	359.465	S5_65538976	S5_16427852	4.4196	3.7329	0.2045	354.965		364.965
7	186.963	S7_2559963	S7_3006241	5.8701	4.9695	-0.2308	184.463		188.463
8	187.532	S8_57305166	S8_44419228	4.8571	4.397	-0.2208	186.032		188.032
8	16.5319	S8_2392981	S8_3110973	3.802	3.2062	-0.1856	16.0319		19.0319
ADF_16_S
1	390.989	S1_59369684	S1_58834907	2.8114	3.5311	-0.1482	389.489		393.489
2	120.137	S2_70384142	S2_71485265	6.7858	9.0743	-0.2374	118.637		121.637
2	299.137	S2_43213849	S2_8884495	4.7852	5.9772	0.1931	293.637		300.637
ADL_16_S
1	362.989	S1_64547158	S1_61373169	4.4909	6.1989	0.0276	361.489		372.489
2	299.137	S2_43213849	S2_8884495	3.6161	4.7348	0.0242	293.637		300.637
2	120.137	S2_70384142	S2_71485265	2.8606	4.0028	-0.0221	118.637		121.637
7	184.963	S7_2559963	S7_3006241	2.7938	3.8315	-0.0217	182.463		187.463
9	332.342	S9_50538298	S9_50006335	2.6535	3.4733	0.0207	331.842		334.842
ME_16_S
1	363.989	S1_64547158	S1_61373169	4.6684	5.4443	-0.0314	361.489		373.489
2	299.137	S2_43213849	S2_8884495	6.1976	6.6139	-0.0346	293.637		300.637
2	120.137	S2_70384142	S2_71485265	5.0396	5.742	0.032	117.637		121.637
4	137.246	S4_54228509	S4_53671341	2.9369	3.4665	0.025	135.746		137.746
IVOMD_16_S
1	361.989	S1_64479483	S1_64547158	6.1653	5.2555	-0.1919	361.489		370.489
2	299.137	S2_43213849	S2_8884495	8.2708	7.2307	-0.2255	294.637		300.637
2	120.137	S2_70384142	S2_71485265	4.5399	4.162	0.1699	117.637		121.637
4	143.246	S4_53280964	S4_52473484	2.9253	3.5272	0.1563	141.746		143.746
8	15.5319	S8_2064184	S8_2392950	2.7952	5.0791	-0.1874	15.0319		16.0319
9	53.3423	S9_17562362	S9_26419553	3.181	3.1744	0.1556	46.8423		58.8423
10	189.376	S10_57181179	S10_58323275	2.6936	2.8217	0.1411	184.876		192.876
DFL_17_C
1	360.989	S1_65181092	S1_64479483	5.5332	3.6584	1.389	359.489		362.489
1	392.989	S1_59369684	S1_58834907	3.7001	2.3333	-1.107	391.489		394.489
1	397.989	S1_58834907	S1_57944966	2.96	2.0455	1.037	397.489		398.489
2	59.1366	S2_59425885	S2_59949625	5.0479	3.3958	1.3477	57.6366		61.6366
2	54.1366	S2_58565145	S2_59425885	3.0716	1.9166	-1.0168	53.6366		54.6366
4	102.246	S4_62599717	S4_62462834	6.8477	4.52	1.5735	101.746		102.746
4	144.246	S4_52500456	S4_52473624	4.104	2.509	-1.1511	143.746		146.746
7	282.963	S7_62957152	S7_63088145	11.0822	7.1271	-1.93	282.463		284.463
9	382.342	S9_4377961	S9_3329619	4.9686	3.4818	-1.349	381.842		382.842
9	332.342	S9_50538298	S9_50006335	3.0719	1.9007	-1.0002	331.842		335.842
10	287.376	S10_42831404	S10_24403949	15.3576	10.2473	2.3142	286.876		287.876
PH_17_C
2	329.137	S2_3918445	S2_3754312	4.3461	4.6349	-6.0835	328.637		329.637
3	231.087	S3_61722545	S3_62430521	3.2261	4.1878	-5.7959	230.587		231.587
7	235.963	S7_54699104	S7_56368290	34.1652	22.1931	13.5206	234.463		237.463
7	258.963	S7_58694851	S7_59366675	22.5225	18.6047	-12.2325	258.463		259.463
7	254.963	S7_58694851	S7_59366675	19.1593	13.1655	10.364	254.463		255.463
7	242.963	S7_56368290	S7_57555393	7.1337	6.7657	-7.3526	242.463		243.463
10	197.376	S10_58931102	S10_59355959	4.1113	2.1139	4.1168	195.876		197.876
FW_17_C
3	228.087	S3_61565073	S3_61722531	5.3381	5.4551	59.5905	224.587		229.587
7	259.963	S7_59366675	S7_62915731	9.7554	10.8313	-83.7018	258.463		262.463
7	231.963	S7_32004530	S7_54709064	7.78	8.5211	74.6706	231.463		232.463
7	254.963	S7_58694851	S7_59366675	4.8149	5.3059	58.8724	254.463		255.463
10	188.376	S10_57181179	S10_58323275	4.4527	5.0862	57.6134	185.876		191.876
DW_17_C
3	228.087	S3_61565073	S3_61722531	7.395	7.0389	22.1461	224.587		229.587
7	259.963	S7_59366675	S7_62915731	8.4197	8.5168	-24.2836	258.463		262.463
7	231.963	S7_32004530	S7_54709064	8.422	8.4236	24.2919	231.463		232.463
7	254.963	S7_58694851	S7_59366675	4.174	4.1507	17.0359	254.463		255.463
8	116.532	S8_58901767	S8_60002405	2.9651	5.0279	18.5571	114.032		122.032
10	188.376	S10_57181179	S10_58323275	4.1588	4.2987	17.3259	185.876		191.876
GW_17_C
4	104.246	S4_62188721	S4_61960378	3.1648	3.2269	-13.0488	102.746		104.746
7	180.963	S7_539726	S7_2491861	5.9632	7.8072	20.1145	178.463		182.463
7	234.963	S7_54699104	S7_56368290	4.351	4.2711	-15.1076	233.463		238.463
NDM_17_C
6	94.8997	S6_22508233	S6_37475956	2.5123	2.5915	0.0103	94.3997		96.3997
8	220.532	S8_60001721	S8_62498647	2.5449	4.6561	0.0115	220.032		221.032
NDF_17_C
8	8.5319	S8_452946	S8_2064184	2.5086	3.3254	-0.2159	5.0319		12.0319
ADF_17_C
1	309.989	S1_77869564	S1_77657255	2.6575	2.9255	0.1545	309.489		311.489
5	329.465	S5_68641943	S5_66052168	2.8273	4.1257	-0.1832	324.965		333.965
ADL_17_C
4	213.246	S4_28381768	S4_23830452	2.653	3.146	-0.0233	211.746		214.746
5	206.465	S5_26893103	S5_4512565	3.5739	4.6497	-0.0213	203.965		210.965
ME_17_C
5	171.465	S5_47057455	S5_46698954	2.5099	3.6637	-0.0198	170.965		171.965
IVOMD_17_C
5	171.465	S5_47057455	S5_46698954	2.614	2.6722	-0.1241	170.965		171.965
6	164.9	S6_2193049	S6_3199668	2.6848	5.2489	-0.1637	164.4		167.4
DFL_17_S
1	360.989	S1_65181092	S1_64479483	5.8566	4.0896	1.3368	359.489		362.489
2	59.1366	S2_59425885	S2_59949625	5.1053	3.4588	1.2374	57.6366		60.6366
2	54.1366	S2_58565145	S2_59425885	3.3418	2.1577	-0.9817	53.6366		54.6366
4	156.246	S4_50305079	S4_16500155	3.115	3.1248	1.1692	154.746		156.746
4	102.246	S4_62599717	S4_62462834	3.7822	2.5301	1.0721	101.746		102.746
9	382.342	S9_4377961	S9_3329619	3.49	2.4838	-1.0367	381.842		382.842
10	287.376	S10_42831404	S10_24403949	14.5135	10.0548	2.0862	286.876		288.876
PH_17_S
1	347.989	S1_67679522	S1_67191688	3.3655	4.5374	6.5072	347.489		348.489
6	186.9	S6_43252501	S6_43992662	4.9977	2.3075	-4.6414	186.4		187.4
7	235.963	S7_54699104	S7_56368290	39.4796	22.3924	14.6839	235.463		236.463
7	258.963	S7_58694851	S7_59366675	22.8168	17.2026	-12.7371	258.463		259.463
7	254.963	S7_58694851	S7_59366675	22.9844	13.3536	11.2849	254.463		255.463
7	242.963	S7_56368290	S7_57555393	10.1771	8.4826	-8.9017	242.463		243.463
10	197.376	S10_58931102	S10_59355959	5.4895	2.3831	4.7259	195.876		197.876
FW_17_S
2	306.137	S2_7659353	S2_4271638	6.3375	7.2214	55.61	304.637		308.637
3	229.087	S3_61565073	S3_61722531	3.3848	3.6199	39.5224	227.587		229.587
5	102.465	S5_949160	S5_64686361	3.0444	3.1266	-36.55	97.9653		105.965
6	160.9	S6_2710956	S6_2193049	3.2617	6.1766	51.8525	159.4		161.4
7	243.963	S7_57555393	S7_57598884	4.0835	6.2086	-51.3295	241.463		244.463
7	259.963	S7_59366675	S7_62915731	5.0681	5.3329	-47.8309	258.463		263.463
DW_17_S
2	306.137	S2_7659353	S2_4271638	5.7668	5.6958	16.7674	303.637		310.637
3	229.087	S3_61565073	S3_61722531	4.3511	4.0817	14.2507	225.587		229.587
3	317.087	S3_34959079	S3_34233090	2.794	2.4983	-11.0562	316.587		317.587
5	101.465	S5_949160	S5_64686361	3.801	3.7264	-13.5643	94.9653		104.965
5	170.465	S5_26276597	S5_47971325	3.4598	3.2577	-16.9863	169.965		170.965
7	243.963	S7_57555393	S7_57598884	4.9952	7.2109	-18.7812	242.463		244.463
7	259.963	S7_59366675	S7_62915731	5.041	4.6378	-15.1429	258.463		264.463
7	254.963	S7_58694851	S7_59366675	2.6336	2.3491	10.8326	254.463		255.463
GW_17_S
7	246.963	S7_57847730	S7_58155350	2.6653	7.0578	-19.5827	245.463		247.463
8	11.5319	S8_452946	S8_2064184	4.5696	4.3281	15.2997	8.0319		14.0319
10	507.376	S10_50947148	S10_10828402	2.6622	2.0767	10.6803	468.876		507.376
NDF_17_S
2	73.1366	S2_61411614	S2_61453155	3.6396	6.0282	-0.156	72.6366		74.6366
ADF_17_S
2	73.1366	S2_61411614	S2_61453155	3.9218	5.717	-0.1351	69.6366		73.6366
ADL_17_S
1	353.989	S1_66894583	S1_65725731	3.8942	4.0437	0.0196	352.489		354.489
1	220.989	S1_4453937	S1_8089574	3.471	3.5005	0.024	220.489		222.489
3	270.087	S3_72118504	S3_72384125	2.7583	6.0756	0.024	268.587		270.587
7	229.963	S7_39535613	S7_32004530	2.7587	2.6757	-0.0159	228.463		230.463
ME_17_S
1	353.989	S1_66894583	S1_65725731	3.3414	2.6881	-0.0182	352.489		354.489
8	18.5319	S8_2392981	S8_3110973	4.0957	6.8139	0.0288	16.0319		20.0319
8	187.532	S8_57305166	S8_44419228	2.7908	2.2817	0.017	186.032		188.032
IVOMD_17_S
1	330.989	S1_73791442	S1_71687167	23.1551	3.9404	0.3354	330.489		331.489
1	328.989	S1_74475248	S1_73811826	16.3125	2.8353	-0.2852	328.489		329.489
1	334.989	S1_73791442	S1_71687167	6.2136	1.4477	-0.2027	334.489		335.489

## Sheet: Table_3
Table 3: Epistatic effect for all 11 traits under both treatment and across years (534)
TraitID	TraitName	Chromosome1	Position1	LeftMarker1	RightMarker1	Chromosome2	Position2	LeftMarker2	RightMarker2	LOD	PVE(%)	Add1	Add2	EPI interactions
1	DFL_C	1	311.989	S1_77657255	S1_76467936	2	55.1366	S2_58565145	S2_59425885	4.1342	5.4994	-0.2359	-0.3872	1.3811
1	DFL_C	2	100.137	S2_64671795	S2_65853422	8	185.532	S8_57305166	S8_44419228	4.0688	4.2998	-0.0558	0.4612	1.1504
1	DFL_C	4	160.246	S4_15606925	S4_8841820	9	35.3423	S9_58168693	S9_58168659	4.2661	2.3453	0.2871	0.0354	0.9169
2	PH_C	1	251.989	S1_789700	S1_27632778	1	256.989	S1_789700	S1_27632778	4.2786	3.0378	6.545	-5.4262	-7.2564
2	PH_C	2	335.137	S2_3738983	S2_2036820	3	76.0871	S3_36005209	S3_1340262	4.1521	1.8382	0.7926	-0.2468	-5.3455
2	PH_C	1	281.989	S1_27632778	S1_79996636	4	35.2459	S4_51984597	S4_23830427	6.1909	4.0656	4.38	-2.1553	-8.1067
2	PH_C	2	155.137	S2_76750671	S2_73644245	5	267.465	S5_9286117	S5_46698948	4.2457	3.3562	3.6143	1.7758	8.6572
2	PH_C	2	15.1366	S2_22390998	S2_34303932	6	255.9	S6_55260501	S6_55690184	4.0754	1.3204	1.8716	-2.9343	-4.8327
3	FW_C	2	305.137	S2_8884495	S2_7659353	6	185.9	S6_43252501	S6_43992662	5.5389	7.943	20.4175	-17.5868	101.297
3	FW_C	3	181.087	S3_51838794	S3_52994987	10	255.376	S10_60920070	S10_54687807	5.1192	2.5389	-4.0944	4.1748	-60.8446
4	DW_C	2	35.1366	S2_12721870	S2_32224095	5	302.465	S5_69617967	S5_71727225	4.0288	4.2027	-13.2576	6.041	-31.0423
4	DW_C	2	310.137	S2_7659353	S2_4271638	6	185.9	S6_43252501	S6_43992662	4.3587	5.7974	-0.1615	-7.516	36.6376
4	DW_C	1	351.989	S1_67073525	S1_66830103	7	204.963	S7_5062356	S7_5813728	4.5103	6.4976	-18.6504	14.1159	-34.0238
4	DW_C	6	175.9	S6_3980119	S6_38026772	10	50.3759	S10_36830752	S10_37927053	4.4675	6.7296	-7.3432	-15.9273	37.9099
5	GW_C	5	172.465	S5_47169462	S5_57273006	9	35.3423	S9_58168693	S9_58168659	4.3113	6.8943	13.684	11.7559	18.6156
5	GW_C	4	205.246	S4_9649301	S4_26346886	9	260.342	S9_30847923	S9_14996839	4.2786	3.1314	8.9868	-10.3828	-16.6164
6	NDM_C	1	166.989	S1_29051628	S1_29051667	1	171.989	S1_29051628	S1_29051667	38.8729	1.2059	-0.1125	0.1142	-0.1208
6	NDM_C	1	186.989	S1_2028352	S1_17989235	2	260.137	S2_3127076	S2_3127026	42.1317	1.3594	-0.1252	-0.126	0.1254
6	NDM_C	2	260.137	S2_3127076	S2_3127026	2	275.137	S2_37294566	S2_49777405	48.2958	1.3653	-0.1239	0.1277	-0.1225
6	NDM_C	1	221.989	S1_4453937	S1_8089574	3	111.087	S3_14775730	S3_7702108	38.0058	1.2872	0.1194	0.124	0.1188
6	NDM_C	2	260.137	S2_3127076	S2_3127026	3	111.087	S3_14775730	S3_7702108	52.7248	1.503	-0.1277	0.1336	-0.126
6	NDM_C	3	111.087	S3_14775730	S3_7702108	3	356.087	S3_31167605	S3_10532821	41.5905	1.311	0.125	-0.1189	-0.1173
6	NDM_C	3	116.087	S3_14775730	S3_7702108	4	60.2459	S4_23830427	S4_67109048	36.4719	1.3249	0.126	-0.1163	-0.1198
6	NDM_C	2	260.137	S2_3127076	S2_3127026	4	65.2459	S4_23830427	S4_67109048	44.5782	1.3777	-0.1266	-0.1234	0.127
6	NDM_C	1	241.989	S1_31760687	S1_17989231	4	75.2459	S4_23830427	S4_67109048	42.2253	1.1923	0.1149	-0.1177	-0.1207
6	NDM_C	4	165.246	S4_15606925	S4_8841820	4	170.246	S4_8841852	S4_9669495	34.2783	1.186	-0.1167	0.119	-0.116
6	NDM_C	1	326.989	S1_74475248	S1_73811826	5	167.465	S5_47240381	S5_26276597	21.7309	1.1874	0.1152	0.1174	0.118
6	NDM_C	2	260.137	S2_3127076	S2_3127026	5	177.465	S5_46113240	S5_27872449	45.3055	1.36	-0.1262	0.1249	-0.1256
6	NDM_C	3	116.087	S3_14775730	S3_7702108	5	202.465	S5_26522691	S5_26893103	41.442	1.2917	0.1236	0.1202	0.118
6	NDM_C	5	267.465	S5_9286117	S5_46698948	5	272.465	S5_46698948	S5_46862944	37.3403	1.1855	0.1185	-0.1163	-0.1153
6	NDM_C	5	202.465	S5_26522691	S5_26893103	6	90.8997	S6_8316563	S6_23665594	36.0714	1.1809	0.1177	0.1165	0.1157
6	NDM_C	6	90.8997	S6_8316563	S6_23665594	6	105.9	S6_42607550	S6_22508190	37.5096	1.1812	0.1179	0.1155	0.1182
6	NDM_C	1	241.989	S1_31760687	S1_17989231	6	120.9	S6_40831108	S6_37475958	42.9996	1.1945	0.1158	-0.1165	-0.1198
6	NDM_C	3	111.087	S3_14775730	S3_7702108	6	120.9	S6_40831108	S6_37475958	38.5484	1.3247	0.1258	-0.1162	-0.1194
6	NDM_C	2	260.137	S2_3127076	S2_3127026	6	185.9	S6_43252501	S6_43992662	42.1254	1.4039	-0.1264	0.1276	-0.1223
6	NDM_C	1	216.989	S1_15370447	S1_4453944	7	89.9627	S7_58885610	S7_51760096	37.3909	1.1932	0.1148	0.1182	0.1191
6	NDM_C	5	167.465	S5_47240381	S5_26276597	7	89.9627	S7_58885610	S7_51760096	37.2577	1.177	0.1176	0.1162	0.1171
6	NDM_C	6	110.9	S6_40259710	S6_22028121	7	89.9627	S7_58885610	S7_51760096	36.6525	1.2059	0.1147	0.118	0.1208
6	NDM_C	3	116.087	S3_14775730	S3_7702108	7	104.963	S7_64448970	S7_24369010	43.0784	1.3018	0.1259	-0.1172	-0.1201
6	NDM_C	2	260.137	S2_3127076	S2_3127026	7	134.963	S7_20604613	S7_31212809	43.3871	1.3602	-0.1262	-0.1254	0.1248
6	NDM_C	3	111.087	S3_14775730	S3_7702108	8	50.5319	S8_5976722	S8_14086203	33.0795	1.2884	0.1243	-0.1196	-0.1182
6	NDM_C	2	260.137	S2_3127076	S2_3127026	8	230.532	S8_8437534	S8_8437543	39.4316	1.3599	-0.1261	-0.1254	0.1249
6	NDM_C	1	281.989	S1_27632778	S1_79996636	9	235.342	S9_7283341	S9_7283340	38.7233	1.1814	0.1144	0.1192	0.115
6	NDM_C	2	260.137	S2_3127076	S2_3127026	9	235.342	S9_7283341	S9_7283340	47.7497	1.3626	-0.1248	0.1267	-0.1234
6	NDM_C	5	177.465	S5_46113240	S5_27872449	9	235.342	S9_7283341	S9_7283340	40.4709	1.1779	0.1156	0.1182	0.1157
6	NDM_C	6	190.9	S6_44605496	S6_45061366	9	235.342	S9_7283341	S9_7283340	37.6164	1.1774	-0.1173	0.1168	-0.1165
6	NDM_C	7	24.9627	S7_58885598	S7_23375323	9	235.342	S9_7283341	S9_7283340	37.3602	1.1825	0.1142	0.1198	0.1141
6	NDM_C	8	125.532	S8_61176187	S8_62498687	9	235.342	S9_7283341	S9_7283340	40.4878	1.2009	-0.1131	0.1188	-0.1167
6	NDM_C	9	210.342	S9_59382460	S9_1594306	9	235.342	S9_7283341	S9_7283340	38.5248	1.1822	0.1143	0.1191	0.1154
6	NDM_C	3	111.087	S3_14775730	S3_7702108	9	240.342	S9_53010283	S9_53010284	43.0442	1.2981	0.1248	0.1187	0.1186
6	NDM_C	4	75.2459	S4_23830427	S4_67109048	9	245.342	S9_53010284	S9_30847885	38.9554	1.2018	-0.117	0.1151	-0.1204
6	NDM_C	3	111.087	S3_14775730	S3_7702108	10	70.3759	S10_22574335	S10_36830781	39.7659	1.3158	0.1254	-0.1188	-0.1169
6	NDM_C	4	35.2459	S4_51984597	S4_23830427	10	95.3759	S10_42448780	S10_6919731	39.6506	1.1998	-0.1151	0.1172	-0.1191
6	NDM_C	7	24.9627	S7_58885598	S7_23375323	10	95.3759	S10_42448780	S10_6919731	37.2687	1.1763	0.1168	0.1169	0.1169
6	NDM_C	8	165.532	S8_60001318	S8_15618657	10	95.3759	S10_42448780	S10_6919731	30.855	1.1928	0.1173	0.119	0.1139
6	NDM_C	10	55.3759	S10_36830752	S10_37927053	10	95.3759	S10_42448780	S10_6919731	36.4953	1.1796	0.1161	0.117	0.1175
6	NDM_C	5	272.465	S5_46698948	S5_46862944	10	170.376	S10_29012477	S10_29012457	35.7774	1.1784	-0.1181	0.1156	-0.1178
6	NDM_C	1	241.989	S1_31760687	S1_17989231	10	195.376	S10_58437817	S10_58931104	41.3411	1.1856	0.1144	-0.1202	-0.1182
6	NDM_C	9	235.342	S9_7283341	S9_7283340	10	260.376	S10_54444619	S10_54053415	38.7303	1.1799	0.1186	0.1156	0.1148
6	NDM_C	2	260.137	S2_3127076	S2_3127026	10	315.376	S10_7521634	S10_6530980	45.8423	1.3635	-0.1263	0.1254	-0.124
7	NDF_C	1	341.989	S1_71823042	S1_68834396	3	216.087	S3_58746245	S3_60260671	4.1044	3.968	0.0323	0.0556	-0.1698
7	NDF_C	4	245.246	S4_2317264	S4_1725066	5	177.465	S5_46113240	S5_27872449	4.2604	5.642	0.1175	-0.0829	0.2402
7	NDF_C	9	260.342	S9_30847923	S9_14996839	10	280.376	S10_50915964	S10_47723364	4.7554	4.464	0.0146	-0.1668	0.2175
8	ADF_C	2	260.137	S2_3127076	S2_3127026	3	116.087	S3_14775730	S3_7702108	6.1351	2.0809	-0.902	0.787	-0.8495
8	ADF_C	3	111.087	S3_14775730	S3_7702108	3	336.087	S3_22848731	S3_40237666	5.8977	2.1778	0.8491	-0.8237	-0.9146
8	ADF_C	3	121.087	S3_7702108	S3_45904562	4	240.246	S4_2317295	S4_2317264	4.4397	1.971	0.8436	-0.8381	-0.8718
8	ADF_C	3	336.087	S3_22848731	S3_40237666	5	172.465	S5_47169462	S5_57273006	4.7138	2.572	-0.8343	0.8218	-0.9458
8	ADF_C	5	252.465	S5_62068513	S5_62068470	5	257.465	S5_62068470	S5_2111222	4.7875	2.0938	-0.7981	0.8584	-0.8559
8	ADF_C	3	106.087	S3_33963143	S3_14775747	8	60.5319	S8_50357776	S8_53915266	4.1306	1.971	0.8246	-0.8654	-0.8567
8	ADF_C	3	116.087	S3_14775730	S3_7702108	9	200.342	S9_43769845	S9_59382507	4.906	2.0873	0.8205	0.8511	0.8903
8	ADF_C	10	175.376	S10_29012457	S10_56299597	10	180.376	S10_56299603	S10_56337814	5.8478	2.4298	0.8207	-0.9189	-0.8207
8	ADF_C	2	260.137	S2_3127076	S2_3127026	10	320.376	S10_6011796	S10_5175156	6.0239	1.9904	-0.876	0.8227	-0.8185
8	ADF_C	5	172.465	S5_47169462	S5_57273006	10	320.376	S10_6011796	S10_5175156	4.466	2.2747	0.7896	0.8813	0.8985
8	ADF_C	3	336.087	S3_22848731	S3_40237666	10	325.376	S10_4620536	S10_3169867	4.3137	2.1584	-0.7909	0.8892	-0.8919
8	ADF_C	9	280.342	S9_30847887	S9_58539611	10	335.376	S10_3169867	S10_1799198	4.043	1.7513	-0.1135	0.2105	0.2925
9	ADL_C	1	241.989	S1_31760687	S1_17989231	2	80.1366	S2_62052172	S2_63059339	5.0627	1.624	0.1111	0.1282	0.1361
9	ADL_C	2	260.137	S2_3127076	S2_3127026	3	116.087	S3_14775730	S3_7702108	9.714	2.2288	-0.1508	0.1252	-0.1428
9	ADL_C	1	211.989	S1_25035644	S1_15370267	3	291.087	S3_73845516	S3_27804678	4.6781	1.3893	-0.0063	-0.0028	0.0262
9	ADL_C	3	111.087	S3_14775730	S3_7702108	3	296.087	S3_27804657	S3_40294562	6.3575	1.6496	0.1171	-0.123	-0.1309
9	ADL_C	3	116.087	S3_14775730	S3_7702108	4	235.246	S4_55229969	S4_2317295	5.1774	1.6973	0.1109	-0.1311	-0.1259
9	ADL_C	2	260.137	S2_3127076	S2_3127026	5	202.465	S5_26522691	S5_26893103	4.8945	1.8292	-0.0997	0.0741	-0.0866
9	ADL_C	3	116.087	S3_14775730	S3_7702108	5	202.465	S5_26522691	S5_26893103	5.4889	1.8769	0.1164	0.1216	0.1351
9	ADL_C	5	252.465	S5_62068513	S5_62068470	5	257.465	S5_62068470	S5_2111222	5.7031	1.9135	-0.1115	0.1131	-0.1339
9	ADL_C	1	241.989	S1_31760687	S1_17989231	6	100.9	S6_46046022	S6_23665524	4.0973	1.5286	0.1101	0.1335	0.1312
9	ADL_C	2	260.137	S2_3127076	S2_3127026	7	54.9627	S7_61677437	S7_49831231	5.7502	1.9905	-0.1462	-0.1315	0.1355
9	ADL_C	2	260.137	S2_3127076	S2_3127026	8	60.5319	S8_50357776	S8_53915266	6.434	1.9722	-0.1446	-0.1346	0.1325
9	ADL_C	3	106.087	S3_33963143	S3_14775747	8	60.5319	S8_50357776	S8_53915266	4.3466	1.4627	0.1189	-0.1237	-0.1236
9	ADL_C	3	116.087	S3_14775730	S3_7702108	9	195.342	S9_43769845	S9_59382507	5.5323	1.6386	0.113	0.1288	0.1277
9	ADL_C	5	257.465	S5_62068470	S5_2111222	9	235.342	S9_7283341	S9_7283340	4.1844	1.5726	0.1112	0.1328	0.1116
9	ADL_C	3	106.087	S3_33963143	S3_14775747	10	175.376	S10_29012457	S10_56299597	4.7392	1.316	0.0525	0.0528	0.0601
9	ADL_C	10	175.376	S10_29012457	S10_56299597	10	180.376	S10_56299603	S10_56337814	5.9123	1.4773	0.12	-0.1251	-0.1207
9	ADL_C	2	260.137	S2_3127076	S2_3127026	10	320.376	S10_6011796	S10_5175156	8.6515	1.9612	-0.1439	0.1351	-0.133
9	ADL_C	5	172.465	S5_47169462	S5_57273006	10	320.376	S10_6011796	S10_5175156	4.5561	1.6203	0.1137	0.1274	0.1263
10	ME_C	1	241.989	S1_31760687	S1_17989231	2	160.137	S2_73644242	S2_35267470	5.4941	0.6396	-0.124	0.1436	0.1459
10	ME_C	2	260.137	S2_3127076	S2_3127026	3	116.087	S3_14775730	S3_7702108	7.1624	0.6168	0.1381	-0.1305	0.1353
10	ME_C	3	111.087	S3_14775730	S3_7702108	3	336.087	S3_22848731	S3_40237666	6.9804	0.6902	-0.1355	0.1304	0.145
10	ME_C	1	241.989	S1_31760687	S1_17989231	4	65.2459	S4_23830427	S4_67109048	4.937	0.7028	-0.1268	0.1379	0.1489
10	ME_C	2	260.137	S2_3127076	S2_3127026	4	240.246	S4_2317295	S4_2317264	4.3726	0.675	0.1404	0.1262	-0.1383
10	ME_C	3	121.087	S3_7702108	S3_45904562	4	240.246	S4_2317295	S4_2317264	5.5178	0.6421	-0.1353	0.1311	0.1401
10	ME_C	3	116.087	S3_14775730	S3_7702108	5	202.465	S5_26522691	S5_26893103	5.3986	0.6851	-0.1345	-0.1306	-0.1433
10	ME_C	5	252.465	S5_62068513	S5_62068470	5	257.465	S5_62068470	S5_2111222	6.2522	0.7433	0.1223	-0.1371	0.1372
10	ME_C	2	260.137	S2_3127076	S2_3127026	7	54.9627	S7_61677437	S7_49831231	4.2406	0.6093	0.1362	0.1333	-0.1322
10	ME_C	3	336.087	S3_22848731	S3_40237666	7	104.963	S7_64448970	S7_24369010	5.1456	0.6977	0.1253	0.1413	-0.1424
10	ME_C	2	260.137	S2_3127076	S2_3127026	8	60.5319	S8_50357776	S8_53915266	5.1273	0.6143	0.1367	0.1331	-0.1312
10	ME_C	8	200.532	S8_38978294	S8_36037732	8	205.532	S8_38978294	S8_36037732	4.0583	0.7129	0.1343	-0.1437	0.1276
10	ME_C	3	116.087	S3_14775730	S3_7702108	9	200.342	S9_43769845	S9_59382507	5.6972	0.6244	-0.1325	-0.1343	-0.1385
10	ME_C	5	257.465	S5_62068470	S5_2111222	9	235.342	S9_7283341	S9_7283340	4.6571	0.7281	-0.1316	-0.1412	-0.1184
10	ME_C	2	260.137	S2_3127076	S2_3127026	9	275.342	S9_1475079	S9_30847905	5.0579	0.6168	0.134	0.1358	-0.1304
10	ME_C	10	175.376	S10_29012457	S10_56299597	10	180.376	S10_56299603	S10_56337814	7.2445	0.7053	-0.1288	0.1434	0.1341
10	ME_C	2	260.137	S2_3127076	S2_3127026	10	320.376	S10_6011796	S10_5175156	7.4241	0.6118	0.1363	-0.1332	0.1317
10	ME_C	5	172.465	S5_47169462	S5_57273006	10	320.376	S10_6011796	S10_5175156	5.6149	0.723	-0.125	-0.1405	-0.1427
10	ME_C	3	336.087	S3_22848731	S3_40237666	10	325.376	S10_4620536	S10_3169867	5.3779	0.6876	0.1267	-0.1398	0.143
11	IVOMD_C	2	110.137	S2_69466187	S2_69068634	10	30.3759	S10_38367814	S10_53683489	4.4294	7.2599	0.0577	-0.0188	-0.1489
12	DFL_S	4	75.2459	S4_23830427	S4_67109048	5	347.465	S5_65095758	S5_65197895	4.313	6.5375	-0.502	-0.8702	-1.5002
12	DFL_S	2	320.137	S2_7659353	S2_4271638	7	249.963	S7_58298409	S7_58749815	4.1038	3.3883	0.4986	-0.1674	-1.4066
12	DFL_S	2	50.1366	S2_57265544	S2_58565145	9	245.342	S9_53010284	S9_30847885	4.6151	3.3424	-2.0479	-0.8663	-2.2447
12	DFL_S	9	195.342	S9_43769845	S9_59382507	9	245.342	S9_53010284	S9_30847885	4.2876	3.4247	-2.256	-1.8483	-2.3764
13	PH_S	2	115.137	S2_69068634	S2_70395187	9	215.342	S9_59382460	S9_1594306	4.7567	6.1218	-2.1958	-1.1256	6.2372
14	FW_S	1	211.989	S1_25035644	S1_15370267	3	136.087	S3_5509796	S3_6609236	4.6877	0.944	-10.0543	5.437	-66.7766
14	FW_S	4	240.246	S4_2317295	S4_2317264	7	269.963	S7_59366675	S7_62915731	4.7964	7.3892	18.1022	-13.044	-179.837
14	FW_S	6	200.9	S6_46046221	S6_47268476	7	269.963	S7_59366675	S7_62915731	5.0157	7.3324	40.0317	-63.2231	-170.404
14	FW_S	2	190.137	S2_73644242	S2_35267470	9	325.342	S9_51967826	S9_50741975	4.7973	4.0241	9.7393	49.61	122.771
14	FW_S	7	269.963	S7_59366675	S7_62915731	9	380.342	S9_4377961	S9_3329619	4.1547	7.0603	-65.5657	45.4182	-162.188
14	FW_S	3	206.087	S3_57244330	S3_58746245	10	40.3759	S10_53683489	S10_36830752	4.3679	2.065	-66.4947	-39.0311	91.805
14	FW_S	1	366.989	S1_64547158	S1_61373169	10	85.3759	S10_51744457	S10_37104447	4.0192	0.8146	-22.3141	5.6872	-64.1465
14	FW_S	7	274.963	S7_59366675	S7_62915731	10	230.376	S10_60920070	S10_54687807	6.4202	7.6452	-20.2173	15.7536	-189.727
14	FW_S	2	105.137	S2_66319995	S2_69466187	10	330.376	S10_4620536	S10_3169867	4.1478	4.4966	-7.1469	-9.5268	144.145
15	DW_S	1	351.989	S1_67073525	S1_66830103	7	269.963	S7_59366675	S7_62915731	4.5269	4.9978	-23.5428	-24.3919	31.6996
15	DW_S	4	135.246	S4_54228509	S4_53671341	7	269.963	S7_59366675	S7_62915731	5.2177	4.8335	18.5347	-23.5832	-34.5095
15	DW_S	6	210.9	S6_48782367	S6_49220919	7	269.963	S7_59366675	S7_62915731	4.1124	4.8123	-22.0757	-23.1601	32.0649
15	DW_S	6	170.9	S6_3888403	S6_3980114	9	65.3423	S9_26419553	S9_7928007	4.0203	2.7782	-6.3379	4.718	-33.8582
15	DW_S	7	269.963	S7_59366675	S7_62915731	10	330.376	S10_4620536	S10_3169867	5.2346	4.9923	-25.6936	-21.3979	33.459
16	GW_S	1	186.989	S1_2028352	S1_17989235	1	346.989	S1_67679522	S1_67191688	4.079	1.3871	1.7633	0.6446	-12.5088
16	GW_S	2	65.1366	S2_60096135	S2_60347236	2	80.1366	S2_62052172	S2_63059339	4.142	1.1226	2.4825	2.0133	-12.718
16	GW_S	2	10.1366	S2_49777423	S2_22390998	5	167.465	S5_47240381	S5_26276597	4.7731	1.1455	7.2543	16.1839	20.0782
16	GW_S	4	310.246	S4_28381735	S4_12775655	6	250.9	S6_53739276	S6_54442988	5.3264	5.998	2.8234	0.8979	26.0061
16	GW_S	5	27.4653	S5_58482169	S5_16427850	7	239.963	S7_56368290	S7_57555393	4.5189	2.5214	0.6525	-11.9826	15.8035
16	GW_S	5	317.465	S5_69725796	S5_68641943	10	340.376	S10_3169867	S10_1799198	4.4044	6.38	4.4046	0.8804	-26.1879
17	NDM_S	1	401.989	S1_57417687	S1_55817554	9	225.342	S9_1594306	S9_1594309	4.1727	2.0443	-0.0082	-0.0057	-0.0138
17	NDM_S	5	352.465	S5_65197895	S5_65538976	9	285.342	S9_59132487	S9_57060024	4.7952	1.6292	0.0103	0.0006	-0.0137
17	NDM_S	5	362.465	S5_65538976	S5_16427852	10	310.376	S10_7249495	S10_7288565	4.2116	5.8502	-0.0012	-0.0021	-0.0182
18	NDF_S	2	15.1366	S2_22390998	S2_34303932	6	105.9	S6_42607550	S6_22508190	4.0707	2.8333	0.1546	0.3071	0.2913
18	NDF_S	5	172.465	S5_47169462	S5_57273006	6	255.9	S6_55260501	S6_55690184	4.5782	4.5402	-0.0108	-0.2225	-0.3231
18	NDF_S	1	326.989	S1_74475248	S1_73811826	10	270.376	S10_54053415	S10_53486444	4.1969	6.1104	0.0781	-0.0762	0.2695
19	ADF_S	5	312.465	S5_70281107	S5_69718748	8	55.5319	S8_14086203	S8_47690633	5.5826	11.5143	-0.0695	-0.0154	-0.2302
20	ADL_S	1	136.989	S1_55521094	S1_29051813	5	267.465	S5_9286117	S5_46698948	4.3437	4.5654	-0.0261	-0.0005	-0.0489
20	ADL_S	9	110.342	S9_7928051	S9_17562404	10	90.3759	S10_37104470	S10_47036226	4.4243	1.784	-0.0135	0.0064	0.031
20	ADL_S	5	322.465	S5_68641943	S5_66052168	10	185.376	S10_56337814	S10_57181179	4.3893	4.5911	-0.0029	-0.0103	-0.0393
20	ADL_S	2	250.137	S2_75430833	S2_54223920	10	265.376	S10_54444619	S10_54053415	4.6855	2.8739	-0.004	-0.016	0.034
21	ME_S	2	15.1366	S2_22390998	S2_34303932	3	186.087	S3_52994987	S3_56070788	4.0685	3.8412	0.0037	0.0238	0.036
21	ME_S	4	110.246	S4_62026737	S4_60269679	5	292.465	S5_67287071	S5_69618036	4.3212	1.7925	-0.0078	0.0108	-0.0251
21	ME_S	4	175.246	S4_9669498	S4_9649295	6	120.9	S6_40831108	S6_37475958	5.8815	2.7884	-0.0064	-0.0119	0.0262
21	ME_S	5	312.465	S5_70281107	S5_69718748	8	55.5319	S8_14086203	S8_47690633	4.5049	4.1115	0.0105	-0.0003	0.0317
21	ME_S	5	372.465	S5_65538976	S5_16427852	9	315.342	S9_53536151	S9_52479968	4.048	8.6782	-0.0108	0.0037	-0.0481
21	ME_S	1	231.989	S1_57208377	S1_25490027	9	390.342	S9_2969647	S9_1604801	4.0287	2.2193	-0.0028	-0.0131	0.0261
21	ME_S	5	322.465	S5_68641943	S5_66052168	10	185.376	S10_56337814	S10_57181179	4.414	6.7007	-0.002	0.0122	0.0403
22	IVOMD_S	4	175.246	S4_9669498	S4_9649295	6	120.9	S6_40831108	S6_37475958	4.1366	1.4857	-0.0339	-0.0139	0.1305
22	IVOMD_S	6	215.9	S6_49675644	S6_49680962	6	230.9	S6_49676345	S6_51991776	4.6915	5.0907	-0.0443	-0.0084	0.2498
22	IVOMD_S	7	264.963	S7_59366675	S7_62915731	9	165.342	S9_56497595	S9_43769845	4.2212	6.7511	0.0218	-0.0894	0.273
22	IVOMD_S	5	322.465	S5_68641943	S5_66052168	10	185.376	S10_56337814	S10_57181179	4.3292	5.3965	0.0055	0.0554	0.2378
23	DFL_16_C	1	146.989	S1_55521094	S1_29051813	1	151.989	S1_55521094	S1_29051813	7.4545	2.3615	1.4764	-1.4815	-4.0156
23	DFL_16_C	1	306.989	S1_78396385	S1_77869564	2	40.1366	S2_21156574	S2_25487548	4.5651	1.6021	-0.959	-1.2845	1.7082
23	DFL_16_C	2	210.137	S2_22391027	S2_27215310	2	215.137	S2_22391027	S2_27215310	6.5774	1.8895	2.7447	-2.874	-2.7597
23	DFL_16_C	3	11.0871	S3_414033	S3_70079391	3	16.0871	S3_414033	S3_70079391	5.3423	2.3118	2.1315	-2.5411	-2.0459
23	DFL_16_C	4	45.2459	S4_51984597	S4_23830427	4	55.2459	S4_23830427	S4_67109048	6.3426	2.1821	2.1482	-2.1665	-3.204
23	DFL_16_C	3	221.087	S3_58746245	S3_60260671	4	240.246	S4_2317295	S4_2317264	5.0349	1.4654	1.9221	-1.3173	-2.3411
23	DFL_16_C	5	32.4653	S5_58482169	S5_16427850	5	37.4653	S5_58482169	S5_16427850	7.7976	2.2701	-1.9036	2.5824	-2.9741
23	DFL_16_C	6	30.8997	S6_8316562	S6_56641346	6	35.8997	S6_8316562	S6_56641346	6.3094	2.2578	2.7769	-2.9199	-2.2326
23	DFL_16_C	7	149.963	S7_31212809	S7_539726	7	154.963	S7_31212809	S7_539726	6.8953	2.195	-2.5848	2.8911	-2.3102
23	DFL_16_C	8	65.5319	S8_50357776	S8_53915266	8	70.5319	S8_50357776	S8_53915266	5.2811	2.0252	-3.1918	2.7169	-2.5417
23	DFL_16_C	9	180.342	S9_56497595	S9_43769845	9	185.342	S9_43769845	S9_59382507	8.2887	2.2608	0.3697	-0.2621	-4.8677
23	DFL_16_C	4	240.246	S4_2317295	S4_2317264	9	295.342	S9_57060024	S9_56496657	4.045	1.6391	-2.2696	2.1801	-2.834
23	DFL_16_C	3	71.0871	S3_26562573	S3_34959065	10	95.3759	S10_42448780	S10_6919731	4.298	0.5128	2.3673	0.9627	2.7324
23	DFL_16_C	4	315.246	S4_12775655	S4_26346902	10	95.3759	S10_42448780	S10_6919731	4.5719	0.6799	-3.3288	2.4993	-3.7576
23	DFL_16_C	6	100.9	S6_46046022	S6_23665524	10	95.3759	S10_42448780	S10_6919731	4.2304	0.6592	3.9681	3.0284	3.8871
23	DFL_16_C	8	190.532	S8_29389206	S8_44202259	10	95.3759	S10_42448780	S10_6919731	4.3676	0.525	-3.9638	3.5371	-4.191
23	DFL_16_C	1	316.989	S1_76023167	S1_74613069	10	135.376	S10_35349312	S10_38703416	7.1982	1.6106	1.6038	-1.0543	-1.8616
23	DFL_16_C	5	202.465	S5_26522691	S5_26893103	10	335.376	S10_3169867	S10_1799198	4.2703	0.8326	-0.4264	0.2557	1.8201
23	DFL_16_C	10	375.376	S10_1799198	S10_17051342	10	380.376	S10_17051342	S10_50947148	7.2996	2.0615	-2.7361	2.6468	-2.7733
24	PH_16_C	1	256.989	S1_789700	S1_27632778	1	266.989	S1_27632778	S1_79996636	5.3591	1.62	-3.7805	4.6563	-18.2985
24	PH_16_C	2	180.137	S2_73644242	S2_35267470	2	195.137	S2_35267470	S2_34303938	5.3632	1.8114	7.5953	-8.865	-16.9527
24	PH_16_C	3	46.0871	S3_414033	S3_70079391	3	51.0871	S3_414033	S3_70079391	4.4284	1.7083	12.6336	-10.1328	-10.2393
24	PH_16_C	2	70.1366	S2_60347236	S2_61411614	4	30.2459	S4_51984597	S4_23830427	4.548	0.9317	8.921	-4.7059	-10.3594
24	PH_16_C	1	281.989	S1_27632778	S1_79996636	4	35.2459	S4_51984597	S4_23830427	8.3121	1.3315	10.1666	-5.869	-12.3173
24	PH_16_C	3	36.0871	S3_414033	S3_70079391	4	35.2459	S4_51984597	S4_23830427	5.0532	1.4173	13.4447	-7.2151	-10.3205
24	PH_16_C	4	45.2459	S4_51984597	S4_23830427	4	60.2459	S4_23830427	S4_67109048	5.4197	1.3493	-11.7305	12.4504	-12.7377
24	PH_16_C	4	40.2459	S4_51984597	S4_23830427	5	232.465	S5_11323973	S5_12536144	4.5593	1.3304	-6.987	-9.8813	13.1899
24	PH_16_C	6	50.8997	S6_8316562	S6_56641346	6	55.8997	S6_56641346	S6_47652072	5.4874	1.3375	-1.6291	0.9179	-23.4126
24	PH_16_C	3	101.087	S3_33963143	S3_14775747	6	100.9	S6_46046022	S6_23665524	4.275	0.5717	10.0855	10.1871	13.9356
24	PH_16_C	4	35.2459	S4_51984597	S4_23830427	6	245.9	S6_52884464	S6_53739276	5.9609	1.5479	-6.7763	-7.2779	15.107
24	PH_16_C	1	306.989	S1_78396385	S1_77869564	7	239.963	S7_56368290	S7_57555393	6.2072	2.2822	10.0729	14.3245	12.6843
24	PH_16_C	2	315.137	S2_7659353	S2_4271638	7	239.963	S7_56368290	S7_57555393	7.9805	2.3029	-12.411	13.5158	-10.7627
24	PH_16_C	3	141.087	S3_6609236	S3_7132713	7	239.963	S7_56368290	S7_57555393	9.4537	2.3911	9.4007	14.0996	13.7315
24	PH_16_C	4	40.2459	S4_51984597	S4_23830427	7	239.963	S7_56368290	S7_57555393	9.5818	2.1681	-10.3449	16.5417	-12.8531
24	PH_16_C	5	237.465	S5_12857914	S5_18753551	7	239.963	S7_56368290	S7_57555393	6.5838	2.1618	-10.6626	13.2239	-11.7103
24	PH_16_C	6	135.9	S6_37475936	S6_2710974	7	239.963	S7_56368290	S7_57555393	5.8049	2.2666	-10.6199	14.3043	-11.8297
24	PH_16_C	7	114.963	S7_24369010	S7_20604632	7	239.963	S7_56368290	S7_57555393	4.3095	1.806	8.6503	9.2163	10.4008
24	PH_16_C	7	239.963	S7_56368290	S7_57555393	8	15.5319	S8_2064184	S8_2392950	7.7491	2.3876	13.5256	9.475	14.6225
24	PH_16_C	3	41.0871	S3_414033	S3_70079391	8	50.5319	S8_5976722	S8_14086203	4.394	1.0112	7.2028	-4.6192	-10.7134
24	PH_16_C	1	396.989	S1_58834907	S1_57944966	9	195.342	S9_43769845	S9_59382507	4.2015	1.2947	-9.4045	8.3334	-14.0545
24	PH_16_C	6	200.9	S6_46046221	S6_47268476	9	295.342	S9_57060024	S9_56496657	4.0841	1.4262	7.3317	8.8567	13.5097
24	PH_16_C	7	239.963	S7_56368290	S7_57555393	9	295.342	S9_57060024	S9_56496657	9.2661	2.2128	14.6009	11.9293	12.8482
24	PH_16_C	9	290.342	S9_59132487	S9_57060024	9	295.342	S9_57060024	S9_56496657	4.4473	1.4015	-11.5578	13.5755	-9.3418
24	PH_16_C	3	36.0871	S3_414033	S3_70079391	9	325.342	S9_51967826	S9_50741975	4.4308	1.79	9.5653	12.4726	9.2355
24	PH_16_C	4	35.2459	S4_51984597	S4_23830427	9	325.342	S9_51967826	S9_50741975	6.604	1.7092	-7.9659	15.9604	-9.133
24	PH_16_C	8	175.532	S8_2393145	S8_2393148	9	325.342	S9_51967826	S9_50741975	5.092	1.8298	-5.9363	10.4492	-10.2637
24	PH_16_C	9	325.342	S9_51967826	S9_50741975	10	220.376	S10_60920070	S10_54687807	4.6324	1.8208	11.2588	-8.4987	-9.9073
24	PH_16_C	8	65.5319	S8_50357776	S8_53915266	10	310.376	S10_7249495	S10_7288565	4.1651	1.2343	-5.938	7.5815	-12.9349
24	PH_16_C	10	360.376	S10_1799198	S10_17051342	10	365.376	S10_1799198	S10_17051342	6.6541	1.8257	12.6917	-9.2852	-11.4241
24	PH_16_C	7	239.963	S7_56368290	S7_57555393	10	460.376	S10_50947148	S10_10828402	9.1419	2.3907	12.7502	-14.1031	-10.3104
24	PH_16_C	4	35.2459	S4_51984597	S4_23830427	10	470.376	S10_50947148	S10_10828402	6.5211	1.5991	-6.5666	9.1233	-14.9217
25	FW_16_C	3	6.0871	S3_414033	S3_70079391	3	16.0871	S3_414033	S3_70079391	4.1001	1.2329	-9.5393	-18.7514	-254.345
25	FW_16_C	2	340.137	S2_2036820	S2_630207	5	267.465	S5_9286117	S5_46698948	4.5385	0.8896	89.2113	78.9989	184.699
25	FW_16_C	3	41.0871	S3_414033	S3_70079391	6	170.9	S6_3888403	S6_3980114	4.65	1.3812	92.3575	-82.105	-202.919
25	FW_16_C	9	75.3423	S9_26419553	S9_7928007	9	85.3423	S9_7928007	S9_7928037	4.2208	1.137	-95.7844	92.3643	-181.772
25	FW_16_C	9	225.342	S9_1594306	S9_1594309	10	70.3759	S10_22574335	S10_36830781	4.1481	0.3417	54.0959	-134.062	-151.833
25	FW_16_C	10	420.376	S10_17051342	S10_50947148	10	435.376	S10_50947148	S10_10828402	6.4099	1.3016	117.945	-215.702	-92.5237
26	DW_16_C	3	276.087	S3_72384125	S3_73300617	5	47.4653	S5_58482169	S5_16427850	4.219	1.4899	11.8775	-1.0587	-43.8936
26	DW_16_C	1	416.989	S1_25305315	S1_19554744	10	310.376	S10_7249495	S10_7288565	5.0188	3.773	-28.6058	-16.3352	63.8653
26	DW_16_C	10	415.376	S10_17051342	S10_50947148	10	435.376	S10_50947148	S10_10828402	5.0465	3.7234	6.9746	-25.9497	-69.2369
27	GW_16_C	1	331.989	S1_73791442	S1_71687167	6	70.8997	S6_23665583	S6_6051626	4.4432	7.4148	-2.3474	6.9189	-22.4952
29	NDF_16_C	1	61.9893	S1_21091776	S1_78241999	1	66.9893	S1_78241999	S1_75545662	5.6307	1.4116	0.4822	-0.4832	0.7569
29	NDF_16_C	2	190.137	S2_73644242	S2_35267470	2	195.137	S2_35267470	S2_34303938	6.1545	1.59	-0.6187	0.495	0.6217
29	NDF_16_C	3	6.0871	S3_414033	S3_70079391	3	11.0871	S3_414033	S3_70079391	4.9165	2.0886	-0.2374	0.1648	0.9137
29	NDF_16_C	3	116.087	S3_14775730	S3_7702108	4	240.246	S4_2317295	S4_2317264	4.4081	0.8919	-0.6933	0.6986	0.7008
29	NDF_16_C	4	240.246	S4_2317295	S4_2317264	4	295.246	S4_6491914	S4_7385262	4.8771	1.0338	0.6339	0.6066	-0.7071
29	NDF_16_C	2	140.137	S2_75784352	S2_76750671	5	172.465	S5_47169462	S5_57273006	4.077	1.5057	-0.4268	-0.4506	-0.515
29	NDF_16_C	5	362.465	S5_65538976	S5_16427852	5	367.465	S5_65538976	S5_16427852	4.8817	1.8077	-0.4723	0.6085	0.5301
29	NDF_16_C	6	230.9	S6_49676345	S6_51991776	6	235.9	S6_49676345	S6_51991776	4.6269	1.538	0.595	-0.6663	0.4864
29	NDF_16_C	7	164.963	S7_31212809	S7_539726	7	169.963	S7_31212809	S7_539726	4.2665	1.4888	0.5621	-0.5239	0.5422
29	NDF_16_C	9	80.3423	S9_26419553	S9_7928007	9	295.342	S9_57060024	S9_56496657	4.7902	0.9902	-0.2164	-0.084	-0.422
29	NDF_16_C	3	101.087	S3_33963143	S3_14775747	9	335.342	S9_50538298	S9_50006335	4.287	0.5436	-0.0763	0.3012	0.4051
29	NDF_16_C	4	240.246	S4_2317295	S4_2317264	10	320.376	S10_6011796	S10_5175156	5.5795	0.9102	0.7978	-0.7603	0.8356
29	NDF_16_C	5	172.465	S5_47169462	S5_57273006	10	320.376	S10_6011796	S10_5175156	5.0995	1.0295	-0.961	-0.7356	-0.7496
29	NDF_16_C	8	160.532	S8_38978319	S8_60001318	10	490.376	S10_50947148	S10_10828402	4.1102	1.8976	0.2611	0.4078	-0.5344
29	NDF_16_C	10	495.376	S10_50947148	S10_10828402	10	500.376	S10_50947148	S10_10828402	4.2465	2.0422	-0.4177	0.4561	0.479
30	ADF_16_C	1	191.989	S1_17989235	S1_17989252	1	196.989	S1_17989252	S1_25035644	6.476	1.8215	-1.6574	1.7007	-1.2525
30	ADF_16_C	1	241.989	S1_31760687	S1_17989231	2	85.1366	S2_63059339	S2_63140346	8.0911	1.0985	1.4396	1.5062	1.5801
30	ADF_16_C	2	200.137	S2_35267470	S2_34303938	2	205.137	S2_34303938	S2_22391027	6.8433	1.184	-1.6071	1.5176	-1.4128
30	ADF_16_C	1	216.989	S1_15370447	S1_4453944	3	111.087	S3_14775730	S3_7702108	7.9554	1.0648	1.5402	1.4467	1.4793
30	ADF_16_C	2	260.137	S2_3127076	S2_3127026	3	336.087	S3_22848731	S3_40237666	10.1954	1.1345	-1.5725	-1.3946	1.5344
30	ADF_16_C	3	111.087	S3_14775730	S3_7702108	3	336.087	S3_22848731	S3_40237666	9.9055	1.1458	1.5218	-1.431	-1.5913
30	ADF_16_C	1	241.989	S1_31760687	S1_17989231	4	60.2459	S4_23830427	S4_67109048	7.9625	1.1503	1.4644	-1.4763	-1.5909
30	ADF_16_C	3	121.087	S3_7702108	S3_45904562	4	240.246	S4_2317295	S4_2317264	8.3973	1.148	1.5412	-1.4123	-1.5479
30	ADF_16_C	4	240.246	S4_2317295	S4_2317264	5	172.465	S5_47169462	S5_57273006	5.1496	1.1716	-1.4842	1.453	-1.5917
30	ADF_16_C	2	260.137	S2_3127076	S2_3127026	5	202.465	S5_26522691	S5_26893103	6.0087	0.9299	-1.0457	0.8505	-0.9302
30	ADF_16_C	3	116.087	S3_14775730	S3_7702108	5	202.465	S5_26522691	S5_26893103	7.9672	1.0794	1.4977	1.4608	1.5426
30	ADF_16_C	5	252.465	S5_62068513	S5_62068470	5	257.465	S5_62068470	S5_2111222	8.8077	1.1402	-1.4066	1.5277	-1.4928
30	ADF_16_C	1	241.989	S1_31760687	S1_17989231	5	402.465	S5_3025910	S5_1225703	5.9584	1.0558	1.449	1.5504	1.5165
30	ADF_16_C	6	50.8997	S6_8316562	S6_56641346	6	55.8997	S6_56641346	S6_47652072	7.0961	1.1267	1.4121	-1.3852	-1.5995
30	ADF_16_C	3	341.087	S3_51675906	S3_21813881	6	135.9	S6_37475936	S6_2710974	5.3312	1.0986	1.6404	-1.3671	-1.3219
30	ADF_16_C	3	121.087	S3_7702108	S3_45904562	7	89.9627	S7_58885610	S7_51760096	7.5981	1.0873	1.4577	1.541	1.4229
30	ADF_16_C	4	240.246	S4_2317295	S4_2317264	7	89.9627	S7_58885610	S7_51760096	6.5882	1.1604	-1.3812	1.585	-1.4959
30	ADF_16_C	1	241.989	S1_31760687	S1_17989231	7	209.963	S7_5467628	S7_14230022	6.3154	1.0513	1.4488	-1.5462	-1.5182
30	ADF_16_C	2	265.137	S2_3127033	S2_3127072	8	30.5319	S8_3110973	S8_5976722	4.9724	1.1075	-1.5171	1.4267	-1.5126
30	ADF_16_C	3	106.087	S3_33963143	S3_14775747	8	60.5319	S8_50357776	S8_53915266	8.1395	1.0502	1.4852	-1.4861	-1.5175
30	ADF_16_C	1	241.989	S1_31760687	S1_17989231	8	140.532	S8_62498687	S8_38978320	5.8423	1.0457	1.4478	-1.5415	-1.5253
30	ADF_16_C	5	147.465	S5_2403643	S5_48180816	9	190.342	S9_43769845	S9_59382507	6.1721	1.0491	-1.4995	1.4959	-1.4692
30	ADF_16_C	1	241.989	S1_31760687	S1_17989231	9	195.342	S9_43769845	S9_59382507	5.8061	1.0446	1.4539	1.5215	1.5364
30	ADF_16_C	3	116.087	S3_14775730	S3_7702108	9	200.342	S9_43769845	S9_59382507	8.4998	1.0435	1.4825	1.492	1.5055
30	ADF_16_C	2	275.137	S2_37294566	S2_49777405	9	205.342	S9_43769845	S9_59382507	8.1837	1.0513	1.518	1.4545	1.4879
30	ADF_16_C	9	275.342	S9_1475079	S9_30847905	9	280.342	S9_30847887	S9_58539611	4.7281	0.9737	-1.1114	1.0315	-1.0813
30	ADF_16_C	7	104.963	S7_64448970	S7_24369010	10	175.376	S10_29012457	S10_56299597	7.608	1.1739	-1.5555	1.3968	-1.5428
30	ADF_16_C	9	245.342	S9_53010284	S9_30847885	10	175.376	S10_29012457	S10_56299597	8.7136	1.1739	1.4934	1.4491	1.5901
30	ADF_16_C	10	175.376	S10_29012457	S10_56299597	10	180.376	S10_56299603	S10_56337814	10.3562	1.2548	1.4245	-1.6046	-1.4803
30	ADF_16_C	2	260.137	S2_3127076	S2_3127026	10	320.376	S10_6011796	S10_5175156	10.2817	1.0524	-1.5267	1.4586	-1.4699
30	ADF_16_C	5	172.465	S5_47169462	S5_57273006	10	320.376	S10_6011796	S10_5175156	8.7046	1.148	1.423	1.5276	1.5668
30	ADF_16_C	3	336.087	S3_22848731	S3_40237666	10	325.376	S10_4620536	S10_3169867	8.4526	1.1402	-1.4019	1.56	-1.563
30	ADF_16_C	1	241.989	S1_31760687	S1_17989231	10	340.376	S10_3169867	S10_1799198	5.1521	1.0446	1.4482	1.5355	1.528
31	ADL_16_C	1	146.989	S1_55521094	S1_29051813	1	151.989	S1_55521094	S1_29051813	9.8988	1.3299	-0.2056	0.2163	-0.2937
31	ADL_16_C	2	200.137	S2_35267470	S2_34303938	2	205.137	S2_34303938	S2_22391027	11.9527	0.8584	-0.2607	0.2486	-0.2439
31	ADL_16_C	1	221.989	S1_4453937	S1_8089574	2	260.137	S2_3127076	S2_3127026	10.926	0.8221	0.2433	-0.2549	-0.2481
31	ADL_16_C	1	216.989	S1_15370447	S1_4453944	3	106.087	S3_33963143	S3_14775747	10.7648	0.8324	0.2561	0.2443	0.2442
31	ADL_16_C	2	260.137	S2_3127076	S2_3127026	3	116.087	S3_14775730	S3_7702108	14.7212	0.8304	-0.2581	0.24	-0.2488
31	ADL_16_C	3	111.087	S3_14775730	S3_7702108	3	336.087	S3_22848731	S3_40237666	14.3269	0.8216	0.25	-0.2467	-0.2554
31	ADL_16_C	2	260.137	S2_3127076	S2_3127026	4	180.246	S4_9649301	S4_26346886	8.9762	0.8702	-0.2573	-0.2362	0.2498
31	ADL_16_C	3	121.087	S3_7702108	S3_45904562	4	240.246	S4_2317295	S4_2317264	12.8775	0.8717	0.2428	-0.2599	-0.2408
31	ADL_16_C	4	305.246	S4_26389623	S4_28381735	4	310.246	S4_28381735	S4_12775655	8.0276	0.8353	0.2563	-0.2474	-0.2434
31	ADL_16_C	4	230.246	S4_55229969	S4_2317295	5	172.465	S5_47169462	S5_57273006	11.5421	0.8933	-0.2606	0.2346	-0.2566
31	ADL_16_C	2	260.137	S2_3127076	S2_3127026	5	202.465	S5_26522691	S5_26893103	10.8449	0.7577	-0.1763	0.1525	-0.166
31	ADL_16_C	3	116.087	S3_14775730	S3_7702108	5	202.465	S5_26522691	S5_26893103	12.9916	0.8412	0.2483	0.2464	0.2582
31	ADL_16_C	5	252.465	S5_62068513	S5_62068470	5	257.465	S5_62068470	S5_2111222	14.5029	0.8953	-0.2344	0.2451	-0.2594
31	ADL_16_C	6	50.8997	S6_8316562	S6_56641346	6	55.8997	S6_56641346	S6_47652072	11.8265	1.021	0.2247	-0.2194	-0.2809
31	ADL_16_C	4	295.246	S4_6491914	S4_7385262	6	90.8997	S6_8316563	S6_23665594	5.5163	0.6163	-0.1522	0.1399	-0.1556
31	ADL_16_C	5	147.465	S5_2403643	S5_48180816	6	110.9	S6_40259710	S6_22028121	10.0325	0.8452	-0.259	0.2385	-0.2541
31	ADL_16_C	2	265.137	S2_3127033	S2_3127072	6	115.9	S6_22028114	S6_264604	11.778	0.852	-0.2468	-0.2574	0.2447
31	ADL_16_C	3	341.087	S3_51675906	S3_21813881	6	180.9	S6_29513042	S6_43252501	12.2294	0.8805	0.2647	0.2264	0.2413
31	ADL_16_C	3	341.087	S3_51675906	S3_21813881	7	19.9627	S7_58885598	S7_23375323	12.0202	0.8265	0.2654	0.2337	0.2334
31	ADL_16_C	2	275.137	S2_37294566	S2_49777405	7	54.9627	S7_61677437	S7_49831231	10.4447	0.8275	0.2594	-0.2382	-0.244
31	ADL_16_C	1	216.989	S1_15370447	S1_4453944	7	89.9627	S7_58885610	S7_51760096	8.4262	0.8304	0.2574	0.2423	0.2471
31	ADL_16_C	5	257.465	S5_62068470	S5_2111222	7	89.9627	S7_58885610	S7_51760096	10.8293	0.8275	0.2548	0.2456	0.2461
31	ADL_16_C	7	84.9627	S7_57835476	S7_58885610	7	89.9627	S7_58885610	S7_51760096	12.5823	0.8162	-0.2497	0.2511	-0.2461
31	ADL_16_C	4	340.246	S4_26389634	S4_48047109	7	104.963	S7_64448970	S7_24369010	8.1152	0.9011	-0.2596	-0.2454	0.2385
31	ADL_16_C	6	55.8997	S6_56641346	S6_47652072	7	104.963	S7_64448970	S7_24369010	8.8611	0.8304	-0.2435	-0.2519	0.2524
31	ADL_16_C	3	101.087	S3_33963143	S3_14775747	8	60.5319	S8_50357776	S8_53915266	9.5159	0.8186	0.2512	-0.2459	-0.2525
31	ADL_16_C	2	260.137	S2_3127076	S2_3127026	8	135.532	S8_62498687	S8_38978320	7.4063	0.7288	-0.1703	0.1599	-0.1668
31	ADL_16_C	8	150.532	S8_38978319	S8_60001318	8	155.532	S8_38978319	S8_60001318	10.4167	0.8358	0.2445	-0.242	-0.2571
31	ADL_16_C	7	89.9627	S7_58885610	S7_51760096	8	195.532	S8_44202259	S8_38978294	6.5685	0.8805	0.2573	-0.2367	-0.2549
31	ADL_16_C	4	240.246	S4_2317295	S4_2317264	8	210.532	S8_38978294	S8_36037732	8.6688	0.8756	-0.2584	0.2456	-0.2379
31	ADL_16_C	5	172.465	S5_47169462	S5_57273006	8	210.532	S8_38978294	S8_36037732	10.7177	0.8599	0.2387	0.2567	0.2571
31	ADL_16_C	3	116.087	S3_14775730	S3_7702108	9	200.342	S9_43769845	S9_59382507	13.5081	0.8191	0.2467	0.2498	0.2535
31	ADL_16_C	2	265.137	S2_3127033	S2_3127072	9	205.342	S9_43769845	S9_59382507	9.8655	0.8285	-0.2478	0.2479	-0.2563
31	ADL_16_C	5	257.465	S5_62068470	S5_2111222	9	235.342	S9_7283341	S9_7283340	12.6214	0.8265	0.2503	0.2505	0.242
31	ADL_16_C	8	110.532	S8_58901767	S8_60002405	9	235.342	S9_7283341	S9_7283340	8.0672	0.8177	-0.2442	0.2525	-0.248
31	ADL_16_C	9	200.342	S9_43769845	S9_59382507	9	235.342	S9_7283341	S9_7283340	12.4173	0.8231	0.2433	0.2532	0.2499
31	ADL_16_C	4	240.246	S4_2317295	S4_2317264	9	285.342	S9_59132487	S9_57060024	11.9535	0.856	-0.2601	-0.2409	0.2452
31	ADL_16_C	6	110.9	S6_40259710	S6_22028121	9	285.342	S9_59132487	S9_57060024	11.5047	0.8432	0.2451	-0.2503	-0.26
31	ADL_16_C	7	104.963	S7_64448970	S7_24369010	9	285.342	S9_59132487	S9_57060024	11.2982	0.828	-0.2523	-0.2444	0.2552
31	ADL_16_C	6	65.8997	S6_47652072	S6_23665583	10	170.376	S10_29012477	S10_29012457	9.0852	0.855	-0.2472	0.2446	-0.2596
31	ADL_16_C	7	104.963	S7_64448970	S7_24369010	10	175.376	S10_29012457	S10_56299597	12.1	0.856	-0.2542	0.2406	-0.2568
31	ADL_16_C	9	245.342	S9_53010284	S9_30847885	10	175.376	S10_29012457	S10_56299597	13.374	0.8569	0.249	0.2452	0.2605
31	ADL_16_C	10	175.376	S10_29012457	S10_56299597	10	180.376	S10_56299603	S10_56337814	15.3098	0.8761	0.2408	-0.2607	-0.2503
31	ADL_16_C	2	260.137	S2_3127076	S2_3127026	10	320.376	S10_6011796	S10_5175156	15.2718	0.8285	-0.2579	0.2408	-0.2467
31	ADL_16_C	4	240.246	S4_2317295	S4_2317264	10	320.376	S10_6011796	S10_5175156	11.8045	0.8619	-0.2608	0.2403	-0.2447
31	ADL_16_C	5	172.465	S5_47169462	S5_57273006	10	320.376	S10_6011796	S10_5175156	13.8238	0.88	0.2419	0.2513	0.2627
31	ADL_16_C	1	216.989	S1_15370447	S1_4453944	10	325.376	S10_4620536	S10_3169867	9.3091	0.8255	0.2546	0.2456	0.2447
31	ADL_16_C	3	336.087	S3_22848731	S3_40237666	10	325.376	S10_4620536	S10_3169867	13.1721	0.829	-0.2435	0.2531	-0.2559
31	ADL_16_C	8	210.532	S8_38978294	S8_36037732	10	325.376	S10_4620536	S10_3169867	9.6489	0.8152	0.2518	0.2475	0.2479
32	ME_16_C	1	241.989	S1_31760687	S1_17989231	1	411.989	S1_25305315	S1_19554744	8.1978	0.7282	-0.2077	-0.2232	-0.2295
32	ME_16_C	1	241.989	S1_31760687	S1_17989231	2	160.137	S2_73644242	S2_35267470	9.3429	0.7191	-0.2065	0.2277	0.2269
32	ME_16_C	2	200.137	S2_35267470	S2_34303938	2	205.137	S2_34303938	S2_22391027	7.7406	0.7372	0.226	-0.2175	0.2123
32	ME_16_C	1	216.989	S1_15370447	S1_4453944	3	111.087	S3_14775730	S3_7702108	8.881	0.7225	-0.2235	-0.2113	-0.216
32	ME_16_C	2	260.137	S2_3127076	S2_3127026	3	116.087	S3_14775730	S3_7702108	11.1477	0.7123	0.217	-0.2163	0.2205
32	ME_16_C	3	111.087	S3_14775730	S3_7702108	3	336.087	S3_22848731	S3_40237666	10.79	0.7813	-0.2223	0.208	0.2312
32	ME_16_C	1	241.989	S1_31760687	S1_17989231	4	65.2459	S4_23830427	S4_67109048	9.4072	0.839	-0.2125	0.2138	0.2355
32	ME_16_C	2	160.137	S2_73644242	S2_35267470	4	215.246	S4_26379041	S4_26378809	8.2649	0.7089	0.22	-0.2148	0.2186
32	ME_16_C	3	121.087	S3_7702108	S3_45904562	4	240.246	S4_2317295	S4_2317264	9.37	0.7553	-0.2214	0.2093	0.2246
32	ME_16_C	1	241.989	S1_31760687	S1_17989231	5	172.465	S5_47169462	S5_57273006	8.931	0.9147	-0.2173	-0.2101	-0.2426
32	ME_16_C	3	116.087	S3_14775730	S3_7702108	5	172.465	S5_47169462	S5_57273006	9.1184	0.8921	-0.2258	-0.2014	-0.2347
32	ME_16_C	2	260.137	S2_3127076	S2_3127026	5	202.465	S5_26522691	S5_26893103	6.6512	0.597	0.1435	-0.1275	0.1403
32	ME_16_C	5	252.465	S5_62068513	S5_62068470	5	257.465	S5_62068470	S5_2111222	10.5314	0.8186	0.2004	-0.2166	0.2247
32	ME_16_C	6	50.8997	S6_8316562	S6_56641346	6	55.8997	S6_56641346	S6_47652072	8.1965	0.8005	-0.2036	0.1981	0.2364
32	ME_16_C	3	341.087	S3_51675906	S3_21813881	6	75.8997	S6_6051626	S6_35704459	6.3408	0.7203	-0.2321	0.2029	0.2021
32	ME_16_C	1	241.989	S1_31760687	S1_17989231	6	100.9	S6_46046022	S6_23665524	8.7294	0.7282	-0.207	-0.2289	-0.2226
32	ME_16_C	2	275.137	S2_37294566	S2_49777405	6	140.9	S6_37475936	S6_2710974	6.6071	0.7971	-0.2249	-0.2017	-0.2186
32	ME_16_C	2	260.137	S2_3127076	S2_3127026	7	54.9627	S7_61677437	S7_49831231	8.2319	0.727	0.2145	0.2218	-0.2132
32	ME_16_C	1	241.989	S1_31760687	S1_17989231	7	59.9627	S7_61677437	S7_49831231	8.5169	0.7349	-0.205	0.2307	0.2212
32	ME_16_C	3	336.087	S3_22848731	S3_40237666	7	104.963	S7_64448970	S7_24369010	9.3073	0.8096	0.2051	0.2249	-0.2324
32	ME_16_C	4	240.246	S4_2317295	S4_2317264	7	104.963	S7_64448970	S7_24369010	4.8111	0.7474	0.2072	0.2248	-0.2203
32	ME_16_C	6	55.8997	S6_56641346	S6_47652072	7	104.963	S7_64448970	S7_24369010	4.8759	0.7248	0.213	0.2186	-0.2204
32	ME_16_C	2	275.137	S2_37294566	S2_49777405	8	40.5319	S8_3110973	S8_5976722	5.6606	0.8186	-0.2261	0.199	0.2177
32	ME_16_C	1	241.989	S1_31760687	S1_17989231	8	140.532	S8_62498687	S8_38978320	6.8636	0.7203	-0.2083	0.224	0.2269
32	ME_16_C	8	200.532	S8_38978294	S8_36037732	8	205.532	S8_38978294	S8_36037732	8.0671	0.7304	0.2111	-0.2194	0.2203
32	ME_16_C	2	260.137	S2_3127076	S2_3127026	9	225.342	S9_1594306	S9_1594309	9.0862	0.7349	0.2197	-0.2121	0.2243
32	ME_16_C	5	257.465	S5_62068470	S5_2111222	9	235.342	S9_7283341	S9_7283340	8.6627	0.7643	-0.2152	-0.2232	-0.2013
32	ME_16_C	7	39.9627	S7_23375323	S7_59773786	9	235.342	S9_7283341	S9_7283340	4.6273	0.7327	-0.2052	-0.227	-0.2105
32	ME_16_C	8	30.5319	S8_3110973	S8_5976722	9	235.342	S9_7283341	S9_7283340	5.9287	0.7338	-0.2048	-0.2279	-0.2097
32	ME_16_C	3	336.087	S3_22848731	S3_40237666	9	245.342	S9_53010284	S9_30847885	9.643	0.7904	0.2064	-0.224	0.2311
32	ME_16_C	1	241.989	S1_31760687	S1_17989231	9	295.342	S9_57060024	S9_56496657	8.224	0.7372	-0.209	-0.2221	-0.2307
32	ME_16_C	9	250.342	S9_30847885	S9_42259267	9	355.342	S9_11640379	S9_8900119	6.3634	0.7236	-0.2212	-0.2113	-0.2166
32	ME_16_C	4	240.246	S4_2317295	S4_2317264	10	175.376	S10_29012457	S10_56299597	6.2895	0.822	0.2236	-0.2044	0.2292
32	ME_16_C	9	245.342	S9_53010284	S9_30847885	10	175.376	S10_29012457	S10_56299597	9.871	0.8254	-0.2205	-0.2076	-0.2314
32	ME_16_C	10	175.376	S10_29012457	S10_56299597	10	180.376	S10_56299603	S10_56337814	11.941	0.8458	-0.2043	0.2322	0.2203
32	ME_16_C	2	260.137	S2_3127076	S2_3127026	10	320.376	S10_6011796	S10_5175156	11.7854	0.7135	0.2179	-0.2158	0.2191
32	ME_16_C	5	172.465	S5_47169462	S5_57273006	10	320.376	S10_6011796	S10_5175156	10.1109	0.9046	-0.2015	-0.2252	-0.2355
32	ME_16_C	7	104.963	S7_64448970	S7_24369010	10	320.376	S10_6011796	S10_5175156	6.6347	0.7123	0.2188	-0.2151	0.2182
32	ME_16_C	1	241.989	S1_31760687	S1_17989231	10	325.376	S10_4620536	S10_3169867	8.2451	0.7157	-0.2073	-0.2267	-0.2257
32	ME_16_C	3	336.087	S3_22848731	S3_40237666	10	325.376	S10_4620536	S10_3169867	9.4536	0.787	0.2043	-0.2265	0.2294
32	ME_16_C	8	215.532	S8_36037732	S8_26661497	10	325.376	S10_4620536	S10_3169867	5.6285	0.7203	-0.2218	-0.214	-0.2125
33	IVOMD_16_C	2	260.137	S2_3127076	S2_3127026	3	116.087	S3_14775730	S3_7702108	6.2163	1.5159	1.1073	-1.068	1.0959
33	IVOMD_16_C	3	111.087	S3_14775730	S3_7702108	3	336.087	S3_22848731	S3_40237666	5.4592	1.6011	-1.1162	1.0474	1.1399
33	IVOMD_16_C	3	121.087	S3_7702108	S3_45904562	4	240.246	S4_2317295	S4_2317264	4.5101	1.7411	-1.1242	1.0249	1.15
33	IVOMD_16_C	3	116.087	S3_14775730	S3_7702108	5	172.465	S5_47169462	S5_57273006	4.3087	2.3925	-1.1545	-0.9704	-1.2225
33	IVOMD_16_C	5	252.465	S5_62068513	S5_62068470	5	257.465	S5_62068470	S5_2111222	4.7612	1.5219	1.0609	-1.0789	1.1104
33	IVOMD_16_C	3	116.087	S3_14775730	S3_7702108	9	200.342	S9_43769845	S9_59382507	4.5642	1.528	-1.0886	-1.0738	-1.1137
33	IVOMD_16_C	2	260.137	S2_3127076	S2_3127026	9	225.342	S9_1594306	S9_1594309	4.0195	1.5767	1.1213	-1.0448	1.1189
33	IVOMD_16_C	10	175.376	S10_29012457	S10_56299597	10	180.376	S10_56299603	S10_56337814	6.698	1.9237	-1.011	1.1801	1.1086
33	IVOMD_16_C	2	260.137	S2_3127076	S2_3127026	10	320.376	S10_6011796	S10_5175156	6.825	1.5159	1.1105	-1.0651	1.0931
33	IVOMD_16_C	5	172.465	S5_47169462	S5_57273006	10	320.376	S10_6011796	S10_5175156	5.2668	2.4108	-0.974	-1.1476	-1.2282
33	IVOMD_16_C	3	336.087	S3_22848731	S3_40237666	10	325.376	S10_4620536	S10_3169867	4.3047	1.6498	1.0334	-1.1272	1.1504
34	DFL_16_S	4	160.246	S4_15606925	S4_8841820	9	35.3423	S9_58168693	S9_58168659	4.0595	3.559	0.8336	-0.1655	1.4156
34	DFL_16_S	9	200.342	S9_43769845	S9_59382507	9	245.342	S9_53010284	S9_30847885	4.1021	5.9342	-3.4599	-3.4154	-3.7417
35	PH_16_S	1	176.989	S1_29051721	S1_2028318	4	145.246	S4_52473624	S4_51772248	4.4084	5.4434	0.1477	-0.7705	9.5052
35	PH_16_S	1	51.9893	S1_21091776	S1_78241999	5	97.4653	S5_949160	S5_64686361	4.5498	5.9466	1.6015	1.734	10.0659
35	PH_16_S	1	246.989	S1_789659	S1_789688	7	219.963	S7_5467628	S7_14230022	4.1719	8.2813	5.8521	2.4724	10.7053
36	FW_16_S	1	136.989	S1_55521094	S1_29051813	1	391.989	S1_59369684	S1_58834907	4.4624	3.9687	-45.3257	-33.3737	-181.146
36	FW_16_S	1	171.989	S1_29051628	S1_29051667	3	251.087	S3_67843252	S3_68405491	4.6229	1.2035	-6.1674	-12.7471	-105.547
36	FW_16_S	3	306.087	S3_34601486	S3_40427856	4	350.246	S4_26389634	S4_48047109	4.2649	1.8095	84.0448	-23.9804	-127.575
36	FW_16_S	5	372.465	S5_65538976	S5_16427852	7	244.963	S7_57555393	S7_57598884	4.2025	5.9569	-36.6307	50.2375	-225.601
36	FW_16_S	6	210.9	S6_48782367	S6_49220919	7	269.963	S7_59366675	S7_62915731	4.2651	8.7624	-102.101	-130.465	226.83
36	FW_16_S	6	170.9	S6_3888403	S6_3980114	9	110.342	S9_7928051	S9_17562404	4.2687	6.8482	-37.727	29.1374	-247.255
36	FW_16_S	4	120.246	S4_59500521	S4_56507360	10	35.3759	S10_53683489	S10_36830752	4.3916	4.3661	95.4692	-41.0332	-195.072
36	FW_16_S	2	145.137	S2_76750671	S2_73644245	10	120.376	S10_37927065	S10_2507375	4.4363	1.9931	-51.5093	27.6466	-139.853
36	FW_16_S	7	269.963	S7_59366675	S7_62915731	10	470.376	S10_50947148	S10_10828402	4.7938	11.426	-128.883	81.9468	-279.69
37	DW_16_S	1	141.989	S1_55521094	S1_29051813	1	151.989	S1_55521094	S1_29051813	4.9849	3.511	-33.0843	24.3122	-68.0114
37	DW_16_S	1	331.989	S1_73791442	S1_71687167	3	296.087	S3_27804657	S3_40294562	4.3	1.659	35.5826	-23.737	-47.1606
37	DW_16_S	4	265.246	S4_1320568	S4_4807446	5	187.465	S5_46698907	S5_47240396	4.4	1.2655	-23.9551	23.8125	-46.1908
37	DW_16_S	2	210.137	S2_22391027	S2_27215310	6	50.8997	S6_8316562	S6_56641346	4.2845	1.1136	13.0847	2.4815	-34.5996
37	DW_16_S	9	75.3423	S9_26419553	S9_7928007	9	85.3423	S9_7928007	S9_7928037	4.4648	4.1784	4.2397	-6.5133	-83.642
37	DW_16_S	3	296.087	S3_27804657	S3_40294562	10	180.376	S10_56299603	S10_56337814	4.7462	1.3658	-22.0853	26.8989	-41.2619
37	DW_16_S	9	325.342	S9_51967826	S9_50741975	10	330.376	S10_4620536	S10_3169867	4.2437	4.1069	34.9147	-30.7996	-54.1715
37	DW_16_S	2	170.137	S2_73644242	S2_35267470	10	335.376	S10_3169867	S10_1799198	4.4798	2.6634	-31.1599	-17.9639	54.7343
37	DW_16_S	10	395.376	S10_17051342	S10_50947148	10	400.376	S10_17051342	S10_50947148	4.771	4.5093	29.1848	-59.5238	-37.0811
37	DW_16_S	7	269.963	S7_59366675	S7_62915731	10	475.376	S10_50947148	S10_10828402	4.2791	5.6783	-39.249	27.7258	-64.2596
38	GW_16_S	1	41.9893	S1_27632761	S1_21091776	3	221.087	S3_58746245	S3_60260671	4.0298	3.0747	1.2612	-1.4656	-24.3008
38	GW_16_S	3	236.087	S3_63284401	S3_64874095	3	286.087	S3_73844392	S3_73845516	4.013	3.2247	7.6371	-0.9311	-24.5965
38	GW_16_S	3	206.087	S3_57244330	S3_58746245	9	300.342	S9_56407154	S9_55948381	5.0566	6.7518	5.3834	4.3833	36.7389
38	GW_16_S	8	15.5319	S8_2064184	S8_2392950	9	330.342	S9_50741996	S9_50673039	4.7407	2.9261	10.7156	-3.4118	-22.9194
38	GW_16_S	6	200.9	S6_46046221	S6_47268476	10	25.3759	S10_38367814	S10_53683489	5.4692	7.0779	-4.7878	-1.5531	37.0001
38	GW_16_S	5	142.465	S5_1417378	S5_2403643	10	140.376	S10_35349312	S10_38703416	4.1617	2.564	-2.0989	-8.2815	23.132
39	NDM_16_S	2	270.137	S2_72367889	S2_49777439	5	137.465	S5_1417378	S5_2403643	4.0702	3.6476	0.0031	-0.0057	0.0147
39	NDM_16_S	4	30.2459	S4_51984597	S4_23830427	5	337.465	S5_66052168	S5_64932390	4.1427	2.21	0.0042	0.0049	-0.01
39	NDM_16_S	6	160.9	S6_2710956	S6_2193049	9	95.3423	S9_7928007	S9_7928037	4.3561	7.0322	-0.0019	-0.0026	-0.0185
39	NDM_16_S	2	315.137	S2_7659353	S2_4271638	9	145.342	S9_17562404	S9_56497595	4.9095	5.8516	-0.0062	-0.0002	-0.017
40	NDF_16_S	6	255.9	S6_55260501	S6_55690184	9	235.342	S9_7283341	S9_7283340	4.0489	2.1447	0.4875	0.4956	0.5211
40	NDF_16_S	1	326.989	S1_74475248	S1_73811826	10	270.376	S10_54053415	S10_53486444	4.2905	5.7504	0.0666	-0.0599	0.3526
42	ADL_16_S	4	95.2459	S4_63356553	S4_62985826	5	232.465	S5_11323973	S5_12536144	4.5562	4.2395	-0.0021	0.0054	-0.0474
42	ADL_16_S	2	35.1366	S2_12721870	S2_32224095	5	302.465	S5_69617967	S5_71727225	4.2903	5.4756	0.0141	0.009	0.0522
42	ADL_16_S	7	239.963	S7_56368290	S7_57555393	7	259.963	S7_59366675	S7_62915731	4.296	4.7745	0.0325	0.0007	-0.0414
42	ADL_16_S	1	351.989	S1_67073525	S1_66830103	10	205.376	S10_60920070	S10_54687807	4.8417	6.3279	0.0371	0.0025	-0.0407
44	IVOMD_16_S	4	40.2459	S4_51984597	S4_23830427	4	210.246	S4_19691416	S4_26379030	4.3374	4.1674	-0.1738	-0.1059	0.283
45	DFL_17_C	7	294.963	S7_64026378	S7_64859034	8	130.532	S8_61176187	S8_62498687	4.1773	6.0003	-0.2059	0.774	-1.6399
45	DFL_17_C	1	231.989	S1_57208377	S1_25490027	9	190.342	S9_43769845	S9_59382507	4.1735	6.2774	1.9069	-1.9947	2.0735
46	PH_17_C	1	231.989	S1_57208377	S1_25490027	2	165.137	S2_73644242	S2_35267470	4.0865	5.0557	-0.633	-4.1768	5.9424
46	PH_17_C	1	61.9893	S1_21091776	S1_78241999	5	62.4653	S5_16427850	S5_64686360	4.6469	4.0517	-0.03	0.9267	4.8561
46	PH_17_C	4	245.246	S4_2317264	S4_1725066	10	40.3759	S10_53683489	S10_36830752	4.3438	4.5674	1.0823	1.0788	-5.7283
47	FW_17_C	1	36.9893	S1_27632761	S1_21091776	1	406.989	S1_52223324	S1_32817476	4.1784	1.3311	14.8271	-10.4703	64.9884
47	FW_17_C	1	351.989	S1_67073525	S1_66830103	3	301.087	S3_40294562	S3_34601486	4.3182	5.9628	38.4901	-16.6044	-140.75
47	FW_17_C	1	191.989	S1_17989235	S1_17989252	4	80.2459	S4_67014076	S4_66317876	4.0388	2.6811	8.0536	16.929	86.6633
47	FW_17_C	1	396.989	S1_58834907	S1_57944966	6	170.9	S6_3888403	S6_3980114	4.1813	5.6747	-25.3806	-29.2526	131.713
47	FW_17_C	6	50.8997	S6_8316562	S6_56641346	8	65.5319	S8_50357776	S8_53915266	4.0306	1.9717	-17.6971	-44.4216	83.248
47	FW_17_C	4	150.246	S4_51738153	S4_50669747	10	100.376	S10_58333925	S10_38703418	4.2324	5.1417	-30.8276	-38.2626	123.484
47	FW_17_C	2	340.137	S2_2036820	S2_630207	10	295.376	S10_10483314	S10_8750642	4.0677	1.9189	-8.913	20.0214	-73.8591
48	DW_17_C	1	141.989	S1_55521094	S1_29051813	1	146.989	S1_55521094	S1_29051813	4.0685	1.8272	18.3173	-17.7544	-45.394
48	DW_17_C	1	351.989	S1_67073525	S1_66830103	3	36.0871	S3_414033	S3_70079391	5.0985	2.0507	-21.5712	20.7993	-40.1554
48	DW_17_C	1	396.989	S1_58834907	S1_57944966	6	170.9	S6_3888403	S6_3980114	4.6224	1.6977	-15.6617	-13.5643	39.8639
48	DW_17_C	4	150.246	S4_51738153	S4_50669747	10	100.376	S10_58333925	S10_38703418	5.0363	1.5553	-11.9427	-16.9226	37.6887
48	DW_17_C	5	187.465	S5_46698907	S5_47240396	10	165.376	S10_10828457	S10_11963644	4.1427	0.643	15.5914	29.1673	31.845
48	DW_17_C	10	440.376	S10_50947148	S10_10828402	10	450.376	S10_50947148	S10_10828402	4.6229	1.8411	-22.9697	31.0294	-29.7541
48	DW_17_C	3	41.0871	S3_414033	S3_70079391	10	455.376	S10_50947148	S10_10828402	4.067	1.8782	22.2877	-22.2756	-39.8383
49	GW_17_C	1	81.9893	S1_78241999	S1_75545662	1	91.9893	S1_75545662	S1_55521094	4.3757	1.343	-34.8513	36.0561	-24.5927
49	GW_17_C	3	351.087	S3_31167605	S3_10532821	3	356.087	S3_31167605	S3_10532821	4.4947	1.2921	0.0095	-1.6256	-54.5598
49	GW_17_C	1	66.9893	S1_78241999	S1_75545662	5	172.465	S5_47169462	S5_57273006	4.3998	1.0387	-23.0662	26.4225	-26.5789
49	GW_17_C	5	382.465	S5_65538976	S5_16427852	5	387.465	S5_16427852	S5_2111278	4.1713	1.1807	27.4641	-25.6481	-53.2843
49	GW_17_C	6	30.8997	S6_8316562	S6_56641346	6	35.8997	S6_8316562	S6_56641346	5.2654	1.5741	27.0993	-20.9881	-43.52
49	GW_17_C	7	114.963	S7_24369010	S7_20604632	7	119.963	S7_20604632	S7_20604615	4.373	1.05	-29.3956	36.083	-35.9497
49	GW_17_C	5	172.465	S5_47169462	S5_57273006	8	5.5319	S8_452946	S8_2064184	4.0919	1.2071	25.3807	17.98	30.6264
49	GW_17_C	8	60.5319	S8_50357776	S8_53915266	8	225.532	S8_25466788	S8_38978333	4.6447	0.7572	-36.2053	25.2116	-36.8988
49	GW_17_C	5	172.465	S5_47169462	S5_57273006	9	130.342	S9_17562404	S9_56497595	4.3068	1.0896	28.3093	21.5396	31.3317
49	GW_17_C	9	200.342	S9_43769845	S9_59382507	9	205.342	S9_43769845	S9_59382507	5.0242	1.3119	26.2522	-24.8298	-41.903
49	GW_17_C	5	172.465	S5_47169462	S5_57273006	10	265.376	S10_54444619	S10_54053415	4.0528	0.9756	20.5442	-19.4808	-28.2934
49	GW_17_C	10	380.376	S10_17051342	S10_50947148	10	385.376	S10_17051342	S10_50947148	6.1144	1.2987	27.3932	-30.8785	-35.0628
50	NDM_17_C	4	90.2459	S4_63932696	S4_63763955	4	220.246	S4_26378787	S4_26378773	4.0043	5.4499	-0.0006	-0.0021	-0.0224
50	NDM_17_C	2	300.137	S2_8884495	S2_7659353	5	232.465	S5_11323973	S5_12536144	4.2096	4.9536	0.0016	-0.0034	-0.021
50	NDM_17_C	1	316.989	S1_76023167	S1_74613069	5	307.465	S5_71293266	S5_70610868	4.1985	0.9618	-0.0017	-0.001	0.0092
50	NDM_17_C	4	40.2459	S4_51984597	S4_23830427	5	317.465	S5_69725796	S5_68641943	4.5441	4.5785	-0.0043	0.0097	-0.0214
50	NDM_17_C	3	211.087	S3_57244330	S3_58746245	6	175.9	S6_3980119	S6_38026772	4.064	6.0382	-0.0026	-0.0036	0.0235
50	NDM_17_C	5	27.4653	S5_58482169	S5_16427850	9	280.342	S9_30847887	S9_58539611	4.1075	1.121	-0.0129	0.007	-0.0164
51	NDF_17_C	2	90.1366	S2_63806993	S2_64461211	4	330.246	S4_23830439	S4_26389634	4.2107	3.5143	-0.0814	-0.1094	0.2555
51	NDF_17_C	4	195.246	S4_9649301	S4_26346886	5	47.4653	S5_58482169	S5_16427850	4.6206	7.4159	-0.0007	0.0458	-0.3525
51	NDF_17_C	2	15.1366	S2_22390998	S2_34303932	5	297.465	S5_69617967	S5_71727225	4.4428	3.1822	0.1145	0.1881	0.2866
51	NDF_17_C	1	316.989	S1_76023167	S1_74613069	6	160.9	S6_2710956	S6_2193049	4.2831	3.5696	0.0068	0.0223	0.2495
51	NDF_17_C	5	397.465	S5_3025910	S5_1225703	8	175.532	S8_2393145	S8_2393148	4.3483	4.1784	0.125	-0.1483	0.2793
51	NDF_17_C	9	230.342	S9_43769851	S9_30847890	10	190.376	S10_57181179	S10_58323275	4.0511	2.3797	-0.0058	-0.017	-0.2073
51	NDF_17_C	2	65.1366	S2_60096135	S2_60347236	10	315.376	S10_7521634	S10_6530980	4.1206	1.854	0.1535	-0.0153	0.2087
52	ADF_17_C	2	90.1366	S2_63806993	S2_64461211	4	330.246	S4_23830439	S4_26389634	4.2142	5.4492	-0.104	-0.0887	0.2127
52	ADF_17_C	2	15.1366	S2_22390998	S2_34303932	5	297.465	S5_69617967	S5_71727225	4.8025	5.5259	0.0954	0.1371	0.2569
52	ADF_17_C	1	221.989	S1_4453937	S1_8089574	7	264.963	S7_59366675	S7_62915731	4.6418	7.153	0.1009	0.1082	0.2687
53	ADL_17_C	1	111.989	S1_75545662	S1_55521094	2	55.1366	S2_58565145	S2_59425885	4.0993	1.9649	-0.0038	-0.0017	0.0281
53	ADL_17_C	2	210.137	S2_22391027	S2_27215310	3	81.0871	S3_1340316	S3_36005223	4.2042	1.5218	0.009	0.0062	0.0285
53	ADL_17_C	4	125.246	S4_59500521	S4_56507360	4	240.246	S4_2317295	S4_2317264	4.0216	2.2442	-0.0238	-0.0171	0.0342
53	ADL_17_C	4	90.2459	S4_63932696	S4_63763955	6	25.8997	S6_6051634	S6_8316588	4.1159	3.53	-0.0077	0.0015	-0.036
53	ADL_17_C	1	431.989	S1_18844958	S1_14207660	6	115.9	S6_22028114	S6_264604	4.1485	3.3278	-0.0037	-0.0169	0.0335
53	ADL_17_C	5	62.4653	S5_16427850	S5_64686360	9	250.342	S9_30847885	S9_42259267	4.7296	1.57	-0.0194	0.0152	-0.0326
54	ME_17_C	3	36.0871	S3_414033	S3_70079391	6	85.8997	S6_28153352	S6_40259660	4.9829	4.2797	0.0234	0.0065	0.0449
54	ME_17_C	1	431.989	S1_18844958	S1_14207660	6	115.9	S6_22028114	S6_264604	4.703	3.3833	-0.0102	0.0144	-0.0382
54	ME_17_C	2	65.1366	S2_60096135	S2_60347236	10	315.376	S10_7521634	S10_6530980	4.2377	0.8892	-0.0176	-0.0047	-0.0244
54	ME_17_C	6	85.8997	S6_28153352	S6_40259660	10	460.376	S10_50947148	S10_10828402	4.2535	3.9327	0.0038	-0.0326	-0.0358
55	IVOMD_17_C	2	20.1366	S2_37294557	S2_35267463	5	297.465	S5_69617967	S5_71727225	4.0522	3.9068	-0.0939	-0.0404	-0.2099
55	IVOMD_17_C	3	36.0871	S3_414033	S3_70079391	6	85.8997	S6_28153352	S6_40259660	4.7608	9.257	0.1119	0.0475	0.2967
55	IVOMD_17_C	1	221.989	S1_4453937	S1_8089574	7	264.963	S7_59366675	S7_62915731	4.5045	4.1557	-0.0703	-0.1113	-0.237
55	IVOMD_17_C	2	65.1366	S2_60096135	S2_60347236	10	315.376	S10_7521634	S10_6530980	4.9315	1.941	-0.098	-0.0197	-0.1625
56	DFL_17_S	1	31.9893	S1_27632761	S1_21091776	1	381.989	S1_61373169	S1_61336147	4.4482	4.4436	-0.0391	0.799	-1.3281
56	DFL_17_S	1	406.989	S1_52223324	S1_32817476	3	151.087	S3_7964448	S3_9798248	5.244	4.0676	-0.3356	-0.0062	1.2744
56	DFL_17_S	5	187.465	S5_46698907	S5_47240396	7	184.963	S7_2559963	S7_3006241	4.3683	4.3822	-0.0711	-1.5878	-1.886
56	DFL_17_S	7	19.9627	S7_58885598	S7_23375323	7	184.963	S7_2559963	S7_3006241	4.5392	2.9452	-0.1226	-0.0097	1.1362
57	PH_17_S	1	66.9893	S1_78241999	S1_75545662	5	62.4653	S5_16427850	S5_64686360	4.6658	1.4537	0.2742	-0.1985	5.3084
57	PH_17_S	1	346.989	S1_67679522	S1_67191688	9	235.342	S9_7283341	S9_7283340	4.9588	1.4565	13.2908	-0.0919	11.3849
57	PH_17_S	2	250.137	S2_75430833	S2_54223920	9	235.342	S9_7283341	S9_7283340	4.0287	1.5976	10.3358	0.8956	13.5454
57	PH_17_S	3	126.087	S3_5793786	S3_6001202	9	235.342	S9_7283341	S9_7283340	4.3329	1.2124	10.4032	0.66	12.6153
57	PH_17_S	4	30.2459	S4_51984597	S4_23830427	9	235.342	S9_7283341	S9_7283340	5.3263	1.3182	10.1814	-2.4302	12.874
57	PH_17_S	8	10.5319	S8_452946	S8_2064184	9	235.342	S9_7283341	S9_7283340	4.901	1.4739	-11.1416	-1.029	-13.2809
57	PH_17_S	9	235.342	S9_7283341	S9_7283340	9	255.342	S9_23769216	S9_30847923	5.9245	1.6319	3.4893	11.3576	14.5244
57	PH_17_S	9	235.342	S9_7283341	S9_7283340	10	215.376	S10_60920070	S10_54687807	4.5142	1.2572	1.722	12.1469	12.9987
58	FW_17_S	3	201.087	S3_56977223	S3_57244330	4	210.246	S4_19691416	S4_26379030	4.6708	0.9926	49.2296	-16.3458	-60.8815
58	FW_17_S	5	52.4653	S5_58482169	S5_16427850	5	57.4653	S5_16427850	S5_64686360	4.1223	2.9465	-66.3954	73.3052	-134.086
58	FW_17_S	3	296.087	S3_27804657	S3_40294562	6	80.8997	S6_35704459	S6_28153390	4.1143	1.2867	-56.1068	48.5128	-80.5204
58	FW_17_S	6	220.9	S6_49676345	S6_51991776	6	225.9	S6_49676345	S6_51991776	4.3827	2.9439	-118	108.409	-89.1723
58	FW_17_S	3	46.0871	S3_414033	S3_70079391	7	239.963	S7_56368290	S7_57555393	4.7812	6.2443	68.0591	-68.053	-83.3131
58	FW_17_S	1	406.989	S1_52223324	S1_32817476	9	180.342	S9_56497595	S9_43769845	5.0482	2.8017	100.936	96.9954	101.486
59	DW_17_S	1	291.989	S1_27632778	S1_79996636	1	296.989	S1_79996636	S1_78396385	4.8416	2.7292	31.7601	-37.2018	-35.0875
59	DW_17_S	4	265.246	S4_1320568	S4_4807446	4	270.246	S4_4807446	S4_5437817	4.7464	2.7848	-37.7973	33.1081	-31.2575
59	DW_17_S	5	57.4653	S5_16427850	S5_64686360	5	62.4653	S5_16427850	S5_64686360	7.4466	2.6316	-31.1677	33.4053	-37.0002
59	DW_17_S	5	137.465	S5_1417378	S5_2403643	6	175.9	S6_3980119	S6_38026772	4.5643	2.2866	2.7365	12.6363	24.2066
59	DW_17_S	6	220.9	S6_49676345	S6_51991776	6	225.9	S6_49676345	S6_51991776	4.7039	2.5056	-34.7985	33.9167	-35.3264
59	DW_17_S	3	336.087	S3_22848731	S3_40237666	7	94.9627	S7_31212828	S7_59442504	4.3684	0.86	-36.0292	41.8906	-45.3516
59	DW_17_S	5	32.4653	S5_58482169	S5_16427850	7	94.9627	S7_31212828	S7_59442504	4.3754	1.1692	-34.7345	22.8885	-35.4403
59	DW_17_S	7	109.963	S7_24369010	S7_20604632	7	114.963	S7_24369010	S7_20604632	5.01	1.6167	-52.1523	62.5114	-56.2431
59	DW_17_S	2	240.137	S2_27215320	S2_35012810	7	249.963	S7_58298409	S7_58749815	4.2067	0.763	-4.7546	-4.6712	14.3766
59	DW_17_S	1	301.989	S1_79996636	S1_78396385	8	45.5319	S8_5976722	S8_14086203	5.2201	1.1387	-5.9442	3.1611	-16.5225
59	DW_17_S	7	94.9627	S7_31212828	S7_59442504	8	185.532	S8_57305166	S8_44419228	4.2223	1.6784	31.9406	42.3143	42.4703
59	DW_17_S	9	145.342	S9_17562404	S9_56497595	9	150.342	S9_56497595	S9_43769845	5.7888	3.3655	-18.1718	16.4929	-55.4478
59	DW_17_S	1	406.989	S1_52223324	S1_32817476	9	180.342	S9_56497595	S9_43769845	5.0735	2.0061	31.2039	31.9287	35.3402
59	DW_17_S	1	221.989	S1_4453937	S1_8089574	10	325.376	S10_4620536	S10_3169867	4.5096	1.8041	57.2714	43.769	58.0532
59	DW_17_S	10	345.376	S10_1799198	S10_17051342	10	350.376	S10_1799198	S10_17051342	5.7424	3.0475	27.2164	-32.5967	-34.8718
60	GW_17_S	1	371.989	S1_64547158	S1_61373169	2	150.137	S2_76750671	S2_73644245	4.6506	5.0124	16.465	7.7539	-23.0057
60	GW_17_S	4	350.246	S4_26389634	S4_48047109	8	90.5319	S8_56504352	S8_57441797	4.587	2.561	-7.555	-1.1835	-17.8447
60	GW_17_S	4	250.246	S4_1980923	S4_1320568	9	340.342	S9_50006335	S9_45262365	4.3893	9.3636	12.0063	-16.0247	31.3875
60	GW_17_S	2	60.1366	S2_59425885	S2_59949625	9	360.342	S9_8900119	S9_4267920	4.8782	2.2708	-8.0088	-6.255	-16.6523
61	NDM_17_S	3	276.087	S3_72384125	S3_73300617	8	55.5319	S8_14086203	S8_47690633	4.8538	6.3645	-0.0026	0.0002	0.0185
62	NDF_17_S	2	235.137	S2_27215320	S2_35012810	4	310.246	S4_28381735	S4_12775655	4.8359	6.387	-0.0286	-0.008	0.2589
62	NDF_17_S	1	366.989	S1_64547158	S1_61373169	6	20.8997	S6_6051634	S6_8316588	4.0079	4.8238	0.0815	-0.069	0.2104
62	NDF_17_S	4	175.246	S4_9669498	S4_9649295	6	120.9	S6_40831108	S6_37475958	4.2701	3.0818	0.0586	0.0572	-0.1804
62	NDF_17_S	7	84.9627	S7_57835476	S7_58885610	10	175.376	S10_29012457	S10_56299597	4.0821	5.0024	-0.1134	-0.0457	-0.2809
63	ADF_17_S	5	347.465	S5_65095758	S5_65197895	5	357.465	S5_65197895	S5_65538976	5.2	4.1969	-0.0092	0.0411	0.3205
63	ADF_17_S	5	312.465	S5_70281107	S5_69718748	8	55.5319	S8_14086203	S8_47690633	4.1125	1.933	-0.053	0.0144	-0.2068
63	ADF_17_S	5	232.465	S5_11323973	S5_12536144	10	435.376	S10_50947148	S10_10828402	4.1991	5.1582	0.1678	0.0884	-0.334
63	ADF_17_S	10	430.376	S10_50947148	S10_10828402	10	445.376	S10_50947148	S10_10828402	4.0395	5.2099	0.1185	-0.1968	0.3346
64	ADL_17_S	4	235.246	S4_55229969	S4_2317295	4	275.246	S4_5437817	S4_5782715	4.0278	2.6735	0.01	-0.03	0.0485
64	ADL_17_S	5	322.465	S5_68641943	S5_66052168	10	185.376	S10_56337814	S10_57181179	5.9153	4.1445	0.0012	0.0068	-0.0427
65	ME_17_S	5	347.465	S5_65095758	S5_65197895	5	352.465	S5_65197895	S5_65538976	4.1128	7.8834	-0.0074	-0.0003	-0.0528
65	ME_17_S	4	175.246	S4_9669498	S4_9649295	6	120.9	S6_40831108	S6_37475958	4.5866	1.9104	-0.0051	-0.0107	0.0228
65	ME_17_S	5	187.465	S5_46698907	S5_47240396	6	190.9	S6_44605496	S6_45061366	4.0985	2.2797	0.004	0.0254	0.0363
65	ME_17_S	5	32.4653	S5_58482169	S5_16427850	8	210.532	S8_38978294	S8_36037732	4.0452	2.891	-0.0096	0.014	-0.0337
65	ME_17_S	5	322.465	S5_68641943	S5_66052168	10	185.376	S10_56337814	S10_57181179	4.9887	5.1198	0.0016	0.0038	0.0387
66	IVOMD_17_S	4	155.246	S4_50669747	S4_50305079	4	265.246	S4_1320568	S4_4807446	4.6317	2.4005	-0.0338	-0.0497	0.1429
66	IVOMD_17_S	2	235.137	S2_27215320	S2_35012810	4	310.246	S4_28381735	S4_12775655	4.5699	3.6275	0.0142	-0.0508	-0.1743
66	IVOMD_17_S	1	346.989	S1_67679522	S1_67191688	5	87.4653	S5_949160	S5_64686361	4.0056	2.0538	0.0077	0.0512	-0.1249
66	IVOMD_17_S	4	175.246	S4_9669498	S4_9649295	6	120.9	S6_40831108	S6_37475958	5.4849	2.5872	-0.0514	-0.0564	0.1488
66	IVOMD_17_S	2	15.1366	S2_22390998	S2_34303932	7	289.963	S7_63949223	S7_64026387	4.0602	1.7337	-0.0014	0.055	0.1433
66	IVOMD_17_S	6	120.9	S6_40831108	S6_37475958	8	120.532	S8_60002405	S8_61064304	4.8858	2.9073	-0.0586	-0.0335	0.1611
66	IVOMD_17_S	1	321.989	S1_76023167	S1_74613069	9	70.3423	S9_26419553	S9_7928007	4.0112	7.8417	0.0062	0.0108	0.2679
66	IVOMD_17_S	7	99.9627	S7_51760097	S7_64449016	9	125.342	S9_17562404	S9_56497595	4.0048	4.641	-0.1273	0.1202	-0.2634
66	IVOMD_17_S	5	322.465	S5_68641943	S5_66052168	10	185.376	S10_56337814	S10_57181179	4.9711	7.3083	0.0007	0.0028	0.2585

## Sheet: Table_4
Table 4: Gene associated for all 11 traits under both treatment and across years from Phytozome (315 )
S no	TraitName	Chromosome	LeftMarker	Chromosome	gene	Start	End				Gene id
1	DFL_S	Chr01	76467936	Chr01	gene	76463309	76468061	.	-	.	Sobic.001G495200.v3.2
2	DFL_S	Chr01	76467936	Chr01	mRNA	76463309	76468061	.	-	.	Sobic.001G495200.1.v3.2
3	DFL_S	Chr01	76467936	Chr01	CDS	76467583	76467941	.	-	0	Sobic.001G495200.1.v3.2.CDS.1
4	DFL_S	Chr07	63503859	Chr07	gene	63503658	63504481	.	+	.	Sobic.007G204400.v3.2
5	DFL_S	Chr07	63503859	Chr07	mRNA	63503658	63504481	.	+	.	Sobic.007G204400.2.v3.2
6	DFL_S	Chr07	63503859	Chr07	CDS	63503789	63504015	.	+	2	Sobic.007G204400.2.v3.2.CDS.2
7	DFL_S	Chr07	63503859	Chr07	gene	63503658	63504481	.	+	.	Sobic.007G204400.v3.2
8	DFL_S	Chr07	63503859	Chr07	mRNA	63503658	63504481	.	+	.	Sobic.007G204400.2.v3.2
9	DFL_S	Chr07	63503859	Chr07	CDS	63503789	63504015	.	+	2	Sobic.007G204400.2.v3.2.CDS.2
10	DFL_S	Chr10	24403949	Chr10	gene	24374770	24413721	.	-	.	Sobic.010G139600.v3.2
11	DFL_S	Chr10	24403949	Chr10	mRNA	24374770	24413721	.	-	.	Sobic.010G139600.1.v3.2
12	DFL_S	Chr10	10483314	Chr10	gene	10480159	10484306	.	-	.	Sobic.010G107100.v3.2
13	DFL_S	Chr10	10483314	Chr10	mRNA	10480159	10484306	.	-	.	Sobic.010G107100.1.v3.2
14	DFL_S	Chr10	10483314	Chr10	CDS	10483234	10484019	.	-	0	Sobic.010G107100.1.v3.2.CDS.1
15	PH_S	Chr07	56368290	Chr07	gene	56367592	56369617	.	+	.	Sobic.007G136300.v3.2
16	PH_S	Chr07	56368290	Chr07	mRNA	56367599	56369617	.	+	.	Sobic.007G136300.2.v3.2
17	PH_S	Chr07	56368290	Chr07	CDS	56368193	56368485	.	+	2	Sobic.007G136300.2.v3.2.CDS.2
18	PH_S	Chr07	56368290	Chr07	mRNA	56367592	56369617	.	+	.	Sobic.007G136300.3.v3.2
19	PH_S	Chr07	56368290	Chr07	CDS	56368193	56368485	.	+	2	Sobic.007G136300.3.v3.2.CDS.2
20	PH_S	Chr07	56368290	Chr07	gene	56367592	56369617	.	+	.	Sobic.007G136300.v3.2
21	PH_S	Chr07	56368290	Chr07	mRNA	56367599	56369617	.	+	.	Sobic.007G136300.2.v3.2
22	PH_S	Chr07	56368290	Chr07	CDS	56368193	56368485	.	+	2	Sobic.007G136300.2.v3.2.CDS.2
23	PH_S	Chr07	56368290	Chr07	mRNA	56367592	56369617	.	+	.	Sobic.007G136300.3.v3.2
24	PH_S	Chr07	56368290	Chr07	CDS	56368193	56368485	.	+	2	Sobic.007G136300.3.v3.2.CDS.2
25	PH_S	Chr07	58694851	Chr07	gene	58690766	58695615	.	+	.	Sobic.007G153900.v3.2
26	PH_S	Chr07	58694851	Chr07	mRNA	58690766	58695615	.	+	.	Sobic.007G153900.1.v3.2
27	PH_S	Chr07	58694851	Chr07	CDS	58693916	58695259	.	+	0	Sobic.007G153900.1.v3.2.CDS.4
28	PH_S	Chr07	58694851	Chr07	gene	58690766	58695615	.	+	.	Sobic.007G153900.v3.2
29	PH_S	Chr07	58694851	Chr07	mRNA	58690766	58695615	.	+	.	Sobic.007G153900.1.v3.2
30	PH_S	Chr07	58694851	Chr07	CDS	58693916	58695259	.	+	0	Sobic.007G153900.1.v3.2.CDS.4
31	FW_S	Chr07	56368290	Chr07	gene	56367592	56369617	.	+	.	Sobic.007G136300.v3.2
32	FW_S	Chr07	56368290	Chr07	mRNA	56367599	56369617	.	+	.	Sobic.007G136300.2.v3.2
33	FW_S	Chr07	56368290	Chr07	CDS	56368193	56368485	.	+	2	Sobic.007G136300.2.v3.2.CDS.2
34	FW_S	Chr07	56368290	Chr07	mRNA	56367592	56369617	.	+	.	Sobic.007G136300.3.v3.2
35	FW_S	Chr07	56368290	Chr07	CDS	56368193	56368485	.	+	2	Sobic.007G136300.3.v3.2.CDS.2
36	FW_S	Chr07	56368290	Chr07	gene	56367592	56369617	.	+	.	Sobic.007G136300.v3.2
37	FW_S	Chr07	56368290	Chr07	mRNA	56367599	56369617	.	+	.	Sobic.007G136300.2.v3.2
38	FW_S	Chr07	56368290	Chr07	CDS	56368193	56368485	.	+	2	Sobic.007G136300.2.v3.2.CDS.2
39	FW_S	Chr07	56368290	Chr07	mRNA	56367592	56369617	.	+	.	Sobic.007G136300.3.v3.2
40	FW_S	Chr07	56368290	Chr07	CDS	56368193	56368485	.	+	2	Sobic.007G136300.3.v3.2.CDS.2
41	FW_S	Chr07	58694851	Chr07	gene	58690766	58695615	.	+	.	Sobic.007G153900.v3.2
42	FW_S	Chr07	58694851	Chr07	mRNA	58690766	58695615	.	+	.	Sobic.007G153900.1.v3.2
43	FW_S	Chr07	58694851	Chr07	CDS	58693916	58695259	.	+	0	Sobic.007G153900.1.v3.2.CDS.4
44	FW_S	Chr07	59366675	Chr07	gene	59365978	59375269	.	+	.	Sobic.007G159000.v3.2
45	FW_S	Chr07	59366675	Chr07	mRNA	59365978	59375269	.	+	.	Sobic.007G159000.1.v3.2
46	FW_S	Chr07	59366675	Chr07	CDS	59366065	59367393	.	+	0	Sobic.007G159000.1.v3.2.CDS.1
47	DW_S	Chr07	59366675	Chr07	gene	59365978	59375269	.	+	.	Sobic.007G159000.v3.2
48	DW_S	Chr07	59366675	Chr07	mRNA	59365978	59375269	.	+	.	Sobic.007G159000.1.v3.2
49	DW_S	Chr07	59366675	Chr07	CDS	59366065	59367393	.	+	0	Sobic.007G159000.1.v3.2.CDS.1
50	NDM_S	Chr07	58298409	Chr07	gene	58295202	58299643	.	+	.	Sobic.007G151100.v3.2
51	NDM_S	Chr07	58298409	Chr07	mRNA	58295202	58299643	.	+	.	Sobic.007G151100.1.v3.2
52	NDM_S	Chr07	58298409	Chr07	CDS	58298134	58298777	.	+	2	Sobic.007G151100.1.v3.2.CDS.5
53	NDF_S	Chr02	61453155	Chr02	gene	61451145	61453620	.	-	.	Sobic.002G223200.v3.2
54	NDF_S	Chr02	61453155	Chr02	mRNA	61451145	61453620	.	-	.	Sobic.002G223200.1.v3.2
55	NDF_S	Chr02	61453155	Chr02	CDS	61452570	61453382	.	-	0	Sobic.002G223200.1.v3.2.CDS.1
56	NDF_S	Chr02	71485265	Chr02	gene	71475963	71485759	.	-	.	Sobic.002G350600.v3.2
57	NDF_S	Chr02	71485265	Chr02	mRNA	71475963	71485759	.	-	.	Sobic.002G350600.1.v3.2
58	NDF_S	Chr02	71485265	Chr02	CDS	71484494	71485759	.	-	0	Sobic.002G350600.1.v3.2.CDS.1
59	NDF_S	Chr07	2559963	Chr07	gene	2559285	2562098	.	+	.	Sobic.007G028500.v3.2
60	NDF_S	Chr07	2559963	Chr07	mRNA	2559285	2562098	.	+	.	Sobic.007G028500.1.v3.2
61	NDF_S	Chr07	2559963	Chr07	CDS	2559685	2560012	.	+	0	Sobic.007G028500.1.v3.2.CDS.1
62	NDF_S	Chr08	2392981	Chr08	gene	2392693	2394058	.	+	.	Sobic.008G026400.v3.2
63	NDF_S	Chr08	2392981	Chr08	mRNA	2392693	2394058	.	+	.	Sobic.008G026400.1.v3.2
64	NDF_S	Chr08	2392981	Chr08	CDS	2392693	2393670	.	+	0	Sobic.008G026400.1.v3.2.CDS.1
65	ADL_S	Chr01	64479483	Chr01	gene	64479317	64480755	.	+	.	Sobic.001G354800.v3.2
66	ADL_S	Chr01	64479483	Chr01	mRNA	64479317	64480755	.	+	.	Sobic.001G354800.1.v3.2
67	ADL_S	Chr01	64479483	Chr01	CDS	64479396	64479781	.	+	0	Sobic.001G354800.1.v3.2.CDS.1
68	ME_S	Chr01	64479483	Chr01	gene	64479317	64480755	.	+	.	Sobic.001G354800.v3.2
69	ME_S	Chr01	64479483	Chr01	mRNA	64479317	64480755	.	+	.	Sobic.001G354800.1.v3.2
70	ME_S	Chr01	64479483	Chr01	CDS	64479396	64479781	.	+	0	Sobic.001G354800.1.v3.2.CDS.1
71	ME_S	Chr02	69068634	Chr02	gene	69068162	69076442	.	+	.	Sobic.002G318300.v3.2
72	ME_S	Chr02	69068634	Chr02	mRNA	69068162	69076442	.	+	.	Sobic.002G318300.1.v3.2
73	ME_S	Chr02	69068634	Chr02	CDS	69068586	69069217	.	+	0	Sobic.002G318300.1.v3.2.CDS.2
74	ME_S	Chr07	57598884	Chr07	gene	57595992	57601394	.	+	.	Sobic.007G146200.v3.2
75	ME_S	Chr07	57598884	Chr07	mRNA	57595992	57601394	.	+	.	Sobic.007G146200.1.v3.2
76	IVOMD_S	Chr08	2392981	Chr08	gene	2392693	2394058	.	+	.	Sobic.008G026400.v3.2
77	IVOMD_S	Chr08	2392981	Chr08	mRNA	2392693	2394058	.	+	.	Sobic.008G026400.1.v3.2
78	IVOMD_S	Chr08	2392981	Chr08	CDS	2392693	2393670	.	+	0	Sobic.008G026400.1.v3.2.CDS.1
79	DFL_16_S	Chr02	21156574	Chr02	gene	21153582	21157635	.	+	.	Sobic.002G137800.v3.2
80	DFL_16_S	Chr02	21156574	Chr02	mRNA	21153582	21157635	.	+	.	Sobic.002G137800.1.v3.2
81	DFL_16_S	Chr02	21156574	Chr02	CDS	21156520	21156774	.	+	0	Sobic.002G137800.1.v3.2.CDS.3
82	DFL_16_S	Chr10	24403949	Chr10	gene	24374770	24413721	.	-	.	Sobic.010G139600.v3.2
83	DFL_16_S	Chr10	24403949	Chr10	mRNA	24374770	24413721	.	-	.	Sobic.010G139600.1.v3.2
84	PH_16_S	Chr07	56368290	Chr07	gene	56367592	56369617	.	+	.	Sobic.007G136300.v3.2
85	PH_16_S	Chr07	56368290	Chr07	mRNA	56367599	56369617	.	+	.	Sobic.007G136300.2.v3.2
86	PH_16_S	Chr07	56368290	Chr07	CDS	56368193	56368485	.	+	2	Sobic.007G136300.2.v3.2.CDS.2
87	PH_16_S	Chr07	56368290	Chr07	mRNA	56367592	56369617	.	+	.	Sobic.007G136300.3.v3.2
88	PH_16_S	Chr07	56368290	Chr07	CDS	56368193	56368485	.	+	2	Sobic.007G136300.3.v3.2.CDS.2
89	PH_16_S	Chr07	56368290	Chr07	gene	56367592	56369617	.	+	.	Sobic.007G136300.v3.2
90	PH_16_S	Chr07	56368290	Chr07	mRNA	56367599	56369617	.	+	.	Sobic.007G136300.2.v3.2
91	PH_16_S	Chr07	56368290	Chr07	CDS	56368193	56368485	.	+	2	Sobic.007G136300.2.v3.2.CDS.2
92	PH_16_S	Chr07	56368290	Chr07	mRNA	56367592	56369617	.	+	.	Sobic.007G136300.3.v3.2
93	PH_16_S	Chr07	56368290	Chr07	CDS	56368193	56368485	.	+	2	Sobic.007G136300.3.v3.2.CDS.2
94	PH_16_S	Chr07	58694851	Chr07	gene	58690766	58695615	.	+	.	Sobic.007G153900.v3.2
95	PH_16_S	Chr07	58694851	Chr07	mRNA	58690766	58695615	.	+	.	Sobic.007G153900.1.v3.2
96	PH_16_S	Chr07	58694851	Chr07	CDS	58693916	58695259	.	+	0	Sobic.007G153900.1.v3.2.CDS.4
97	PH_16_S	Chr07	59366675	Chr07	gene	59365978	59375269	.	+	.	Sobic.007G159000.v3.2
98	PH_16_S	Chr07	59366675	Chr07	mRNA	59365978	59375269	.	+	.	Sobic.007G159000.1.v3.2
99	PH_16_S	Chr07	59366675	Chr07	CDS	59366065	59367393	.	+	0	Sobic.007G159000.1.v3.2.CDS.1
100	FW_16_S	Chr07	56368290	Chr07	gene	56367592	56369617	.	+	.	Sobic.007G136300.v3.2
101	FW_16_S	Chr07	56368290	Chr07	mRNA	56367599	56369617	.	+	.	Sobic.007G136300.2.v3.2
102	FW_16_S	Chr07	56368290	Chr07	CDS	56368193	56368485	.	+	2	Sobic.007G136300.2.v3.2.CDS.2
103	FW_16_S	Chr07	56368290	Chr07	mRNA	56367592	56369617	.	+	.	Sobic.007G136300.3.v3.2
104	FW_16_S	Chr07	56368290	Chr07	CDS	56368193	56368485	.	+	2	Sobic.007G136300.3.v3.2.CDS.2
105	FW_16_S	Chr07	58694851	Chr07	gene	58690766	58695615	.	+	.	Sobic.007G153900.v3.2
106	FW_16_S	Chr07	58694851	Chr07	mRNA	58690766	58695615	.	+	.	Sobic.007G153900.1.v3.2
107	FW_16_S	Chr07	58694851	Chr07	CDS	58693916	58695259	.	+	0	Sobic.007G153900.1.v3.2.CDS.4
108	FW_16_S	Chr07	59366675	Chr07	gene	59365978	59375269	.	+	.	Sobic.007G159000.v3.2
109	FW_16_S	Chr07	59366675	Chr07	mRNA	59365978	59375269	.	+	.	Sobic.007G159000.1.v3.2
110	FW_16_S	Chr07	59366675	Chr07	CDS	59366065	59367393	.	+	0	Sobic.007G159000.1.v3.2.CDS.1
111	DW_16_S	Chr07	59366675	Chr07	gene	59365978	59375269	.	+	.	Sobic.007G159000.v3.2
112	DW_16_S	Chr07	59366675	Chr07	mRNA	59365978	59375269	.	+	.	Sobic.007G159000.1.v3.2
113	DW_16_S	Chr07	59366675	Chr07	CDS	59366065	59367393	.	+	0	Sobic.007G159000.1.v3.2.CDS.1
114	GW_16_S	Chr04	67109048	Chr04	gene	67104883	67109555	.	-	.	Sobic.004G339100.v3.2
115	GW_16_S	Chr04	67109048	Chr04	mRNA	67104883	67109555	.	-	.	Sobic.004G339100.1.v3.2
116	GW_16_S	Chr04	67109048	Chr04	five_prime_UTR	67108950	67109555	.	-	.	Sobic.004G339100.1.v3.2.five_prime_UTR.1
117	NDM_16_S	Chr07	58298409	Chr07	gene	58295202	58299643	.	+	.	Sobic.007G151100.v3.2
118	NDM_16_S	Chr07	58298409	Chr07	mRNA	58295202	58299643	.	+	.	Sobic.007G151100.1.v3.2
119	NDM_16_S	Chr07	58298409	Chr07	CDS	58298134	58298777	.	+	2	Sobic.007G151100.1.v3.2.CDS.5
120	NDM_16_S	Chr01	71687167	Chr01	gene	71687096	71690512	.	+	.	Sobic.001G438800.v3.2
121	NDM_16_S	Chr01	71687167	Chr01	mRNA	71687096	71690512	.	+	.	Sobic.001G438800.1.v3.2
122	NDM_16_S	Chr01	71687167	Chr01	CDS	71687096	71689051	.	+	0	Sobic.001G438800.1.v3.2.CDS.1
123	NDM_16_S	Chr02	70384142	Chr02	gene	70382979	70385365	.	-	.	Sobic.002G335900.v3.2
124	NDM_16_S	Chr02	70384142	Chr02	mRNA	70382979	70385320	.	-	.	Sobic.002G335900.1.v3.2
125	NDM_16_S	Chr02	70384142	Chr02	CDS	70384025	70384155	.	-	2	Sobic.002G335900.1.v3.2.CDS.5
126	NDM_16_S	Chr02	70384142	Chr02	mRNA	70382979	70385365	.	-	.	Sobic.002G335900.3.v3.2
127	NDM_16_S	Chr02	70384142	Chr02	CDS	70384007	70384155	.	-	2	Sobic.002G335900.3.v3.2.CDS.5
128	NDM_16_S	Chr02	70384142	Chr02	mRNA	70382979	70385321	.	-	.	Sobic.002G335900.4.v3.2
129	NDM_16_S	Chr02	70384142	Chr02	CDS	70384007	70384155	.	-	2	Sobic.002G335900.4.v3.2.CDS.5
130	NDM_16_S	Chr07	2559963	Chr07	gene	2559285	2562098	.	+	.	Sobic.007G028500.v3.2
131	NDM_16_S	Chr07	2559963	Chr07	mRNA	2559285	2562098	.	+	.	Sobic.007G028500.1.v3.2
132	NDM_16_S	Chr07	2559963	Chr07	CDS	2559685	2560012	.	+	0	Sobic.007G028500.1.v3.2.CDS.1
133	ADF_16_S	Chr02	70384142	Chr02	gene	70382979	70385365	.	-	.	Sobic.002G335900.v3.2
134	ADF_16_S	Chr02	70384142	Chr02	mRNA	70382979	70385320	.	-	.	Sobic.002G335900.1.v3.2
135	ADF_16_S	Chr02	70384142	Chr02	CDS	70384025	70384155	.	-	2	Sobic.002G335900.1.v3.2.CDS.5
136	ADF_16_S	Chr02	70384142	Chr02	mRNA	70382979	70385365	.	-	.	Sobic.002G335900.3.v3.2
137	ADF_16_S	Chr02	70384142	Chr02	CDS	70384007	70384155	.	-	2	Sobic.002G335900.3.v3.2.CDS.5
138	ADF_16_S	Chr02	70384142	Chr02	mRNA	70382979	70385321	.	-	.	Sobic.002G335900.4.v3.2
139	ADF_16_S	Chr02	70384142	Chr02	CDS	70384007	70384155	.	-	2	Sobic.002G335900.4.v3.2.CDS.5
140	ADL_16_S	Chr01	64547158	Chr01	gene	64546335	64547906	.	-	.	Sobic.001G356000.v3.2
141	ADL_16_S	Chr01	64547158	Chr01	mRNA	64546335	64547906	.	-	.	Sobic.001G356000.1.v3.2
142	ADL_16_S	Chr01	64547158	Chr01	CDS	64546583	64547409	.	-	2	Sobic.001G356000.1.v3.2.CDS.2
143	ME_16_S	Chr01	64547158	Chr01	gene	64546335	64547906	.	-	.	Sobic.001G356000.v3.2
144	ME_16_S	Chr01	64547158	Chr01	mRNA	64546335	64547906	.	-	.	Sobic.001G356000.1.v3.2
145	ME_16_S	Chr01	64547158	Chr01	CDS	64546583	64547409	.	-	2	Sobic.001G356000.1.v3.2.CDS.2
146	ME_16_S	Chr02	70384142	Chr02	gene	70382979	70385365	.	-	.	Sobic.002G335900.v3.2
147	ME_16_S	Chr02	70384142	Chr02	mRNA	70382979	70385320	.	-	.	Sobic.002G335900.1.v3.2
148	ME_16_S	Chr02	70384142	Chr02	CDS	70384025	70384155	.	-	2	Sobic.002G335900.1.v3.2.CDS.5
149	ME_16_S	Chr02	70384142	Chr02	mRNA	70382979	70385365	.	-	.	Sobic.002G335900.3.v3.2
150	ME_16_S	Chr02	70384142	Chr02	CDS	70384007	70384155	.	-	2	Sobic.002G335900.3.v3.2.CDS.5
151	ME_16_S	Chr02	70384142	Chr02	mRNA	70382979	70385321	.	-	.	Sobic.002G335900.4.v3.2
152	ME_16_S	Chr02	70384142	Chr02	CDS	70384007	70384155	.	-	2	Sobic.002G335900.4.v3.2.CDS.5
153	IVOMD_16_S	Chr01	64479483	Chr01	gene	64479317	64480755	.	+	.	Sobic.001G354800.v3.2
154	IVOMD_16_S	Chr01	64479483	Chr01	mRNA	64479317	64480755	.	+	.	Sobic.001G354800.1.v3.2
155	IVOMD_16_S	Chr01	64479483	Chr01	CDS	64479396	64479781	.	+	0	Sobic.001G354800.1.v3.2.CDS.1
156	IVOMD_16_S	Chr02	70384142	Chr02	gene	70382979	70385365	.	-	.	Sobic.002G335900.v3.2
157	IVOMD_16_S	Chr02	70384142	Chr02	mRNA	70382979	70385320	.	-	.	Sobic.002G335900.1.v3.2
158	IVOMD_16_S	Chr02	70384142	Chr02	CDS	70384025	70384155	.	-	2	Sobic.002G335900.1.v3.2.CDS.5
159	IVOMD_16_S	Chr02	70384142	Chr02	mRNA	70382979	70385365	.	-	.	Sobic.002G335900.3.v3.2
160	IVOMD_16_S	Chr02	70384142	Chr02	CDS	70384007	70384155	.	-	2	Sobic.002G335900.3.v3.2.CDS.5
161	IVOMD_16_S	Chr02	70384142	Chr02	mRNA	70382979	70385321	.	-	.	Sobic.002G335900.4.v3.2
162	IVOMD_16_S	Chr02	70384142	Chr02	CDS	70384007	70384155	.	-	2	Sobic.002G335900.4.v3.2.CDS.5
163	DFL_17_S	Chr10	42831404	Chr10	gene	42829856	42831874	.	-	.	Sobic.010G148800.v3.2
164	DFL_17_S	Chr10	42831404	Chr10	mRNA	42829856	42831874	.	-	.	Sobic.010G148800.1.v3.2
165	DFL_17_S	Chr10	42831404	Chr10	CDS	42831240	42831622	.	-	0	Sobic.010G148800.1.v3.2.CDS.1
166	DFL_17_S	Chr06	43252501	Chr06	gene	43250944	43252930	.	+	.	Sobic.006G069500.v3.2
167	DFL_17_S	Chr06	43252501	Chr06	mRNA	43250944	43252930	.	+	.	Sobic.006G069500.1.v3.2
168	DFL_17_S	Chr06	43252501	Chr06	CDS	43251308	43252663	.	+	0	Sobic.006G069500.1.v3.2.CDS.1
169	PH_17_S	Chr07	56368290	Chr07	gene	56367592	56369617	.	+	.	Sobic.007G136300.v3.2
170	PH_17_S	Chr07	56368290	Chr07	mRNA	56367599	56369617	.	+	.	Sobic.007G136300.2.v3.2
171	PH_17_S	Chr07	56368290	Chr07	CDS	56368193	56368485	.	+	2	Sobic.007G136300.2.v3.2.CDS.2
172	PH_17_S	Chr07	56368290	Chr07	mRNA	56367592	56369617	.	+	.	Sobic.007G136300.3.v3.2
173	PH_17_S	Chr07	56368290	Chr07	CDS	56368193	56368485	.	+	2	Sobic.007G136300.3.v3.2.CDS.2
174	PH_17_S	Chr07	58694851	Chr07	gene	58690766	58695615	.	+	.	Sobic.007G153900.v3.2
175	PH_17_S	Chr07	58694851	Chr07	mRNA	58690766	58695615	.	+	.	Sobic.007G153900.1.v3.2
176	PH_17_S	Chr07	58694851	Chr07	CDS	58693916	58695259	.	+	0	Sobic.007G153900.1.v3.2.CDS.4
177	PH_17_S	Chr07	58694851	Chr07	gene	58690766	58695615	.	+	.	Sobic.007G153900.v3.2
178	PH_17_S	Chr07	58694851	Chr07	mRNA	58690766	58695615	.	+	.	Sobic.007G153900.1.v3.2
179	PH_17_S	Chr07	58694851	Chr07	CDS	58693916	58695259	.	+	0	Sobic.007G153900.1.v3.2.CDS.4
180	PH_17_S	Chr10	58931102	Chr10	gene	58928662	58931250	.	-	.	Sobic.010G250000.v3.2
181	PH_17_S	Chr10	58931102	Chr10	mRNA	58928662	58931250	.	-	.	Sobic.010G250000.1.v3.2
182	PH_17_S	Chr10	58931102	Chr10	five_prime_UTR	58931012	58931250	.	-	.	Sobic.010G250000.1.v3.2.five_prime_UTR.1
183	FW_17_S	Chr02	7659353	Chr02	gene	7653306	7659603	.	-	.	Sobic.002G073700.v3.2
184	FW_17_S	Chr02	7659353	Chr02	mRNA	7653306	7659603	.	-	.	Sobic.002G073700.2.v3.2
185	FW_17_S	Chr02	7659353	Chr02	five_prime_UTR	7659320	7659603	.	-	.	Sobic.002G073700.2.v3.2.five_prime_UTR.1
186	FW_17_S	Chr02	7659353	Chr02	mRNA	7653336	7659603	.	-	.	Sobic.002G073700.1.v3.2
187	FW_17_S	Chr02	7659353	Chr02	five_prime_UTR	7659320	7659603	.	-	.	Sobic.002G073700.1.v3.2.five_prime_UTR.1
188	FW_17_S	Chr07	57555393	Chr07	gene	57553940	57556333	.	-	.	Sobic.007G145600.v3.2
189	FW_17_S	Chr07	57555393	Chr07	mRNA	57553940	57556333	.	-	.	Sobic.007G145600.1.v3.2
190	FW_17_S	Chr07	57555393	Chr07	CDS	57554868	57556077	.	-	0	Sobic.007G145600.1.v3.2.CDS.1
191	FW_17_S	Chr07	59366675	Chr07	gene	59365978	59375269	.	+	.	Sobic.007G159000.v3.2
192	FW_17_S	Chr07	59366675	Chr07	mRNA	59365978	59375269	.	+	.	Sobic.007G159000.1.v3.2
193	FW_17_S	Chr07	59366675	Chr07	CDS	59366065	59367393	.	+	0	Sobic.007G159000.1.v3.2.CDS.1
194	DW_17_S	Chr02	7659353	Chr02	gene	7653306	7659603	.	-	.	Sobic.002G073700.v3.2
195	DW_17_S	Chr02	7659353	Chr02	mRNA	7653306	7659603	.	-	.	Sobic.002G073700.2.v3.2
196	DW_17_S	Chr02	7659353	Chr02	five_prime_UTR	7659320	7659603	.	-	.	Sobic.002G073700.2.v3.2.five_prime_UTR.1
197	DW_17_S	Chr02	7659353	Chr02	mRNA	7653336	7659603	.	-	.	Sobic.002G073700.1.v3.2
198	DW_17_S	Chr02	7659353	Chr02	five_prime_UTR	7659320	7659603	.	-	.	Sobic.002G073700.1.v3.2.five_prime_UTR.1
199	DW_17_S	Chr03	61565073	Chr03	gene	61563437	61567044	.	-	.	Sobic.003G280500.v3.2
200	DW_17_S	Chr03	61565073	Chr03	mRNA	61563437	61567044	.	-	.	Sobic.003G280500.1.v3.2
201	DW_17_S	Chr03	61565073	Chr03	CDS	61563609	61565651	.	-	0	Sobic.003G280500.1.v3.2.CDS.3
202	DW_17_S	Chr07	57555393	Chr07	gene	57553940	57556333	.	-	.	Sobic.007G145600.v3.2
203	DW_17_S	Chr07	57555393	Chr07	mRNA	57553940	57556333	.	-	.	Sobic.007G145600.1.v3.2
204	DW_17_S	Chr07	57555393	Chr07	CDS	57554868	57556077	.	-	0	Sobic.007G145600.1.v3.2.CDS.1
205	DW_17_S	Chr07	59366675	Chr07	gene	59365978	59375269	.	+	.	Sobic.007G159000.v3.2
206	DW_17_S	Chr07	59366675	Chr07	mRNA	59365978	59375269	.	+	.	Sobic.007G159000.1.v3.2
207	DW_17_S	Chr07	59366675	Chr07	CDS	59366065	59367393	.	+	0	Sobic.007G159000.1.v3.2.CDS.1
208	PW_17_S	Chr08	452946	Chr08	gene	452671	455534	.	+	.	Sobic.008G004900.v3.2
209	PW_17_S	Chr08	452946	Chr08	mRNA	452671	455534	.	+	.	Sobic.008G004900.1.v3.2
210	PW_17_S	Chr08	452946	Chr08	CDS	452860	453091	.	+	1	Sobic.008G004900.1.v3.2.CDS.2
211	GW_17_S	Chr08	452946	Chr08	mRNA	452706	455534	.	+	.	Sobic.008G004900.3.v3.2
212	GW_17_S	Chr08	452946	Chr08	CDS	452849	453091	.	+	0	Sobic.008G004900.3.v3.2.CDS.1
213	GW_17_S	Chr08	452946	Chr08	mRNA	452671	455534	.	+	.	Sobic.008G004900.2.v3.2
214	GW_17_S	Chr08	452946	Chr08	CDS	452860	453091	.	+	1	Sobic.008G004900.2.v3.2.CDS.2
215	GW_17_S	Chr08	452946	Chr08	gene	452671	455534	.	+	.	Sobic.008G004900.v3.2
216	GW_17_S	Chr08	452946	Chr08	mRNA	452671	455534	.	+	.	Sobic.008G004900.1.v3.2
217	GW_17_S	Chr08	452946	Chr08	CDS	452860	453091	.	+	1	Sobic.008G004900.1.v3.2.CDS.2
218	GW_17_S	Chr08	452946	Chr08	mRNA	452706	455534	.	+	.	Sobic.008G004900.3.v3.2
219	GW_17_S	Chr08	452946	Chr08	CDS	452849	453091	.	+	0	Sobic.008G004900.3.v3.2.CDS.1
220	GW_17_S	Chr08	452946	Chr08	mRNA	452671	455534	.	+	.	Sobic.008G004900.2.v3.2
221	GW_17_S	Chr08	452946	Chr08	CDS	452860	453091	.	+	1	Sobic.008G004900.2.v3.2.CDS.2
222	ADF_17_S	Chr02	61411614	Chr02	gene	61411312	61414071	.	+	.	Sobic.002G222500.v3.2
223	ADF_17_S	Chr02	61411614	Chr02	mRNA	61411312	61414071	.	+	.	Sobic.002G222500.1.v3.2
224	ADF_17_S	Chr02	61411614	Chr02	CDS	61411603	61412281	.	+	0	Sobic.002G222500.1.v3.2.CDS.1
225	ME_17_S	Chr08	2392981	Chr08	gene	2392693	2394058	.	+	.	Sobic.008G026400.v3.2
226	ME_17_S	Chr08	2392981	Chr08	mRNA	2392693	2394058	.	+	.	Sobic.008G026400.1.v3.2
227	ME_17_S	Chr08	2392981	Chr08	CDS	2392693	2393670	.	+	0	Sobic.008G026400.1.v3.2.CDS.1
228	IVOMD_17_S	Chr01	74475248	Chr01	gene	74474653	74476387	.	-	.	Sobic.001G472301.v3.2
229	IVOMD_17_S	Chr01	74475248	Chr01	mRNA	74474653	74476387	.	-	.	Sobic.001G472301.1.v3.2
230	IVOMD_17_S	Chr01	74475248	Chr01	CDS	74475201	74475489	.	-	1	Sobic.001G472301.1.v3.2.CDS.3
231	IVOMD_17_S	Chr01	73791442	Chr01	gene	73790038	73792997	.	+	.	Sobic.001G463900.v3.2
232	IVOMD_17_S	Chr01	73791442	Chr01	mRNA	73790038	73792997	.	+	.	Sobic.001G463900.1.v3.2
233	IVOMD_17_S	Chr01	73791442	Chr01	CDS	73791401	73792265	.	+	1	Sobic.001G463900.1.v3.2.CDS.3
234	IVOMD_17_S	Chr01	73791442	Chr01	mRNA	73790865	73792997	.	+	.	Sobic.001G463900.2.v3.2
235	IVOMD_17_S	Chr01	73791442	Chr01	CDS	73791405	73792265	.	+	0	Sobic.001G463900.2.v3.2.CDS.1
236	IVOMD_17_S	Chr01	73791442	Chr01	gene	73790038	73792997	.	+	.	Sobic.001G463900.v3.2
237	IVOMD_17_S	Chr01	73791442	Chr01	mRNA	73790038	73792997	.	+	.	Sobic.001G463900.1.v3.2
238	IVOMD_17_S	Chr01	73791442	Chr01	CDS	73791401	73792265	.	+	1	Sobic.001G463900.1.v3.2.CDS.3
239	IVOMD_17_S	Chr01	73791442	Chr01	mRNA	73790865	73792997	.	+	.	Sobic.001G463900.2.v3.2
240	IVOMD_17_S	Chr01	73791442	Chr01	CDS	73791405	73792265	.	+	0	Sobic.001G463900.2.v3.2.CDS.1
241	DFL_C	Chr04	62599717	Chr04	gene	62599054	62603155	.	+	.	Sobic.004G283800.v3.2
242	DFL_C	Chr04	62599717	Chr04	mRNA	62599054	62603155	.	+	.	Sobic.004G283800.1.v3.2
243	DFL_C	Chr04	62599717	Chr04	CDS	62599232	62600017	.	+	0	Sobic.004G283800.1.v3.2.CDS.1
244	DFL_C	Chr10	52030111	Chr10	gene	52023606	52037400	.	+	.	Sobic.010G180800.v3.2
245	DFL_C	Chr10	52030111	Chr10	mRNA	52023606	52037400	.	+	.	Sobic.010G180800.2.v3.2
246	DFL_C	Chr10	52030111	Chr10	CDS	52029936	52030415	.	+	0	Sobic.010G180800.2.v3.2.CDS.1
247	DFL_C	Chr10	52030111	Chr10	mRNA	52023606	52037400	.	+	.	Sobic.010G180800.1.v3.2
248	DFL_C	Chr10	52030111	Chr10	CDS	52029936	52030415	.	+	0	Sobic.010G180800.1.v3.2.CDS.1
249	DFL_C	Chr10	42831404	Chr10	gene	42829856	42831874	.	-	.	Sobic.010G148800.v3.2
250	DFL_C	Chr10	42831404	Chr10	mRNA	42829856	42831874	.	-	.	Sobic.010G148800.1.v3.2
251	DFL_C	Chr10	42831404	Chr10	CDS	42831240	42831622	.	-	0	Sobic.010G148800.1.v3.2.CDS.1
252	PH_C	Chr07	58694851	Chr07	gene	58690766	58695615	.	+	.	Sobic.007G153900.v3.2
253	PH_C	Chr07	58694851	Chr07	mRNA	58690766	58695615	.	+	.	Sobic.007G153900.1.v3.2
254	PH_C	Chr07	58694851	Chr07	CDS	58693916	58695259	.	+	0	Sobic.007G153900.1.v3.2.CDS.4
255	PH_C	Chr07	58694851	Chr07	gene	58690766	58695615	.	+	.	Sobic.007G153900.v3.2
256	PH_C	Chr07	58694851	Chr07	mRNA	58690766	58695615	.	+	.	Sobic.007G153900.1.v3.2
257	PH_C	Chr07	58694851	Chr07	CDS	58693916	58695259	.	+	0	Sobic.007G153900.1.v3.2.CDS.4
258	FW_C	Chr07	59366675	Chr07	gene	59365978	59375269	.	+	.	Sobic.007G159000.v3.2
259	FW_C	Chr07	59366675	Chr07	mRNA	59365978	59375269	.	+	.	Sobic.007G159000.1.v3.2
260	FW_C	Chr07	59366675	Chr07	CDS	59366065	59367393	.	+	0	Sobic.007G159000.1.v3.2.CDS.1
261	DW_C	Chr07	58694851	Chr07	gene	58690766	58695615	.	+	.	Sobic.007G153900.v3.2
262	DW_C	Chr07	58694851	Chr07	mRNA	58690766	58695615	.	+	.	Sobic.007G153900.1.v3.2
263	DW_C	Chr07	58694851	Chr07	CDS	58693916	58695259	.	+	0	Sobic.007G153900.1.v3.2.CDS.4
264	DW_C	Chr07	59366675	Chr07	gene	59365978	59375269	.	+	.	Sobic.007G159000.v3.2
265	DW_C	Chr07	59366675	Chr07	mRNA	59365978	59375269	.	+	.	Sobic.007G159000.1.v3.2
266	DW_C	Chr07	59366675	Chr07	CDS	59366065	59367393	.	+	0	Sobic.007G159000.1.v3.2.CDS.1
267	PH_16_C	Chr07	56368290	Chr07	gene	56367592	56369617	.	+	.	Sobic.007G136300.v3.2
268	PH_16_C	Chr07	56368290	Chr07	mRNA	56367599	56369617	.	+	.	Sobic.007G136300.2.v3.2
269	PH_16_C	Chr07	56368290	Chr07	CDS	56368193	56368485	.	+	2	Sobic.007G136300.2.v3.2.CDS.2
270	PH_16_C	Chr07	56368290	Chr07	mRNA	56367592	56369617	.	+	.	Sobic.007G136300.3.v3.2
271	PH_16_C	Chr07	56368290	Chr07	CDS	56368193	56368485	.	+	2	Sobic.007G136300.3.v3.2.CDS.2
272	PH_16_C	Chr07	59366675	Chr07	gene	59365978	59375269	.	+	.	Sobic.007G159000.v3.2
273	PH_16_C	Chr07	59366675	Chr07	mRNA	59365978	59375269	.	+	.	Sobic.007G159000.1.v3.2
274	PH_16_C	Chr07	59366675	Chr07	CDS	59366065	59367393	.	+	0	Sobic.007G159000.1.v3.2.CDS.1
275	FW_16_C	Chr07	59366675	Chr07	gene	59365978	59375269	.	+	.	Sobic.007G159000.v3.2
276	FW_16_C	Chr07	59366675	Chr07	mRNA	59365978	59375269	.	+	.	Sobic.007G159000.1.v3.2
277	FW_16_C	Chr07	59366675	Chr07	CDS	59366065	59367393	.	+	0	Sobic.007G159000.1.v3.2.CDS.1
278	ADF_16_C	Chr10	10483314	Chr10	gene	10480159	10484306	.	-	.	Sobic.010G107100.v3.2
279	ADF_16_C	Chr10	10483314	Chr10	mRNA	10480159	10484306	.	-	.	Sobic.010G107100.1.v3.2
280	ADF_16_C	Chr10	10483314	Chr10	CDS	10483234	10484019	.	-	0	Sobic.010G107100.1.v3.2.CDS.1
281	DFL_17_C	Chr04	62599717	Chr04	gene	62599054	62603155	.	+	.	Sobic.004G283800.v3.2
282	DFL_17_C	Chr04	62599717	Chr04	mRNA	62599054	62603155	.	+	.	Sobic.004G283800.1.v3.2
283	DFL_17_C	Chr04	62599717	Chr04	CDS	62599232	62600017	.	+	0	Sobic.004G283800.1.v3.2.CDS.1
284	DFL_17_C	Chr10	42831404	Chr10	gene	42829856	42831874	.	-	.	Sobic.010G148800.v3.2
285	DFL_17_C	Chr10	42831404	Chr10	mRNA	42829856	42831874	.	-	.	Sobic.010G148800.1.v3.2
286	DFL_17_C	Chr10	42831404	Chr10	CDS	42831240	42831622	.	-	0	Sobic.010G148800.1.v3.2.CDS.1
287	PH_17_C	Chr07	56368290	Chr07	gene	56367592	56369617	.	+	.	Sobic.007G136300.v3.2
288	PH_17_C	Chr07	56368290	Chr07	mRNA	56367599	56369617	.	+	.	Sobic.007G136300.2.v3.2
289	PH_17_C	Chr07	56368290	Chr07	CDS	56368193	56368485	.	+	2	Sobic.007G136300.2.v3.2.CDS.2
290	PH_17_C	Chr07	56368290	Chr07	mRNA	56367592	56369617	.	+	.	Sobic.007G136300.3.v3.2
291	PH_17_C	Chr07	56368290	Chr07	CDS	56368193	56368485	.	+	2	Sobic.007G136300.3.v3.2.CDS.2
292	PH_17_C	Chr07	58694851	Chr07	gene	58690766	58695615	.	+	.	Sobic.007G153900.v3.2
293	PH_17_C	Chr07	58694851	Chr07	mRNA	58690766	58695615	.	+	.	Sobic.007G153900.1.v3.2
294	PH_17_C	Chr07	58694851	Chr07	CDS	58693916	58695259	.	+	0	Sobic.007G153900.1.v3.2.CDS.4
295	PH_17_C	Chr07	58694851	Chr07	gene	58690766	58695615	.	+	.	Sobic.007G153900.v3.2
296	PH_17_C	Chr07	58694851	Chr07	mRNA	58690766	58695615	.	+	.	Sobic.007G153900.1.v3.2
297	PH_17_C	Chr07	58694851	Chr07	CDS	58693916	58695259	.	+	0	Sobic.007G153900.1.v3.2.CDS.4
298	FW_17_C	Chr07	32004530	Chr07	gene	31999643	32035305	.	-	.	Sobic.007G103600.v3.2
299	FW_17_C	Chr07	32004530	Chr07	mRNA	31999643	32035305	.	-	.	Sobic.007G103600.1.v3.2
300	FW_17_C	Chr07	32004530	Chr07	mRNA	31999643	32035305	.	-	.	Sobic.007G103600.2.v3.2
301	FW_17_C	Chr07	59366675	Chr07	gene	59365978	59375269	.	+	.	Sobic.007G159000.v3.2
302	FW_17_C	Chr07	59366675	Chr07	mRNA	59365978	59375269	.	+	.	Sobic.007G159000.1.v3.2
303	FW_17_C	Chr07	59366675	Chr07	CDS	59366065	59367393	.	+	0	Sobic.007G159000.1.v3.2.CDS.1
304	DW_17_C	Chr03	61565073	Chr03	gene	61563437	61567044	.	-	.	Sobic.003G280500.v3.2
305	DW_17_C	Chr03	61565073	Chr03	mRNA	61563437	61567044	.	-	.	Sobic.003G280500.1.v3.2
306	DW_17_C	Chr03	61565073	Chr03	CDS	61563609	61565651	.	-	0	Sobic.003G280500.1.v3.2.CDS.3
307	DW_17_C	Chr07	32004530	Chr07	gene	31999643	32035305	.	-	.	Sobic.007G103600.v3.2
308	DW_17_C	Chr07	32004530	Chr07	mRNA	31999643	32035305	.	-	.	Sobic.007G103600.1.v3.2
309	DW_17_C	Chr07	32004530	Chr07	mRNA	31999643	32035305	.	-	.	Sobic.007G103600.2.v3.2
310	DW_17_C	Chr07	59366675	Chr07	gene	59365978	59375269	.	+	.	Sobic.007G159000.v3.2
311	DW_17_C	Chr07	59366675	Chr07	mRNA	59365978	59375269	.	+	.	Sobic.007G159000.1.v3.2
312	DW_17_C	Chr07	59366675	Chr07	CDS	59366065	59367393	.	+	0	Sobic.007G159000.1.v3.2.CDS.1
313	GW_17_C	Chr07	539726	Chr07	gene	537027	541042	.	+	.	Sobic.007G006300.v3.2
314	GW_17_C	Chr07	539726	Chr07	mRNA	537027	541042	.	+	.	Sobic.007G006300.1.v3.2
315	GW_17_C	Chr07	539726	Chr07	CDS	537785	540155	.	+	1	Sobic.007G006300.1.v3.2.CDS.2

## Sheet: Table_5
Table 5: Gene annotation identified from blast search in Phtytozome for Sorghum bicolor v 3.1 (42)
Gene_Id	Chr	Start	End	Ontology	GO_term	PANTHER_family or subfamily	Pathway
Sobic.001G495200	Chr01	76463309	76468061	molecular_function,biological_process,biological_process,biological_process	oxidoreductase activity,oxidation-reduction process,cell redox homeostasis,oxidation-reduction process	DISULFIDE OXIDOREDUCTASE|NA	GLUTATHIONE_METABOLISM
Sobic.007G204400	Chr07	63503658	63504481			GLUTAREDOXIN|NA
Sobic.010G139600	Chr10	24374770	24413721	molecular_function,molecular_function,biological_process	protein kinase activity,ATP binding,protein phosphorylation	MITOGEN-ACTIVATED KINASE KINASE KINASE|NA
Sobic.010G107100	Chr10	10480159	10484306	NA	NA	FAMILY NOT NAMED|NA
Sobic.007G136300	Chr07	56367592	56369617	molecular_function,biological_process	DNA binding,regulation of transcription, DNA-templated	FAMILY NOT NAMED|NA
Sobic.007G153900	Chr07	58690766	58695615	NA,NA,molecular_function,biological_process,biological_process,molecular_function,molecular_function,biological_process	NA,NA,oxidoreductase activity,oxidation-reduction process,nitrate assimilation,oxidoreductase activity,molybdenum ion binding,oxidation-reduction process	NADH-CYTOCHROME B5 REDUCTASE|SUBFAMILY NOT NAMED	NITROGEN_METABOLISM
Sobic.007G159000	Chr07	59365978	59375269			DNAJ HOMOLOG SUBFAMILY C MEMBER|NA
Sobic.002G261500	Chr02	64670997	64672324	NA	NA	FAMILY NOT NAMED|SUBFAMILY NOT NAMED
Sobic.003G248600	Chr03	58746137	58750406	molecular_function	ATP binding	26S PROTEASE REGULATORY SUBUNIT	PROTEASOME
Sobic.003G346200	Chr03	66707730	66714083			FAMILY NOT NAMED|SUBFAMILY NOT NAMED
Sobic.003G400200	Chr03	70883840	70885508	NA	NA	FAMILY NOT NAMED|NA
Sobic.004G247400	Chr04	59499107	59501310	NA	NA	FAMILY NOT NAMED|SUBFAMILY NOT NAMED
Sobic.007G151100	Chr07	58295202	58299643	molecular_function,molecular_function,biological_process	FMN binding,oxidoreductase activity,oxidation-reduction process	NADH OXIDOREDUCTASE-RELATED|NA	ALPHA-LINOLENIC_ACID_METABOLISM
Sobic.002G223200	Chr02	61451145	61453620	NA	NA	PROTEASE FAMILY S26 MITOCHONDRIAL INNER MEMBRANE PROTEASE-RELATED|NA	PROTEIN_EXPORT
Sobic.002G350600	Chr02	71475963	71485759	molecular_function,NA	protein binding,NA	IMPORTIN BETA|SUBFAMILY NOT NAMED
Sobic.007G028500	Chr07	2559285	2562098	NA	NA	FAMILY NOT NAMED
Sobic.008G026400	Chr08	2392693	2394058	NA	NA	FAMILY NOT NAMED|SUBFAMILY NOT NAMED
Sobic.001G354800	Chr01	64479317	64480755			FAMILY NOT NAMED|SUBFAMILY NOT NAMED
Sobic.002G318300	Chr02	69068162	69076442	molecular_function,molecular_function,biological_process,biological_process,cellular_component	drug transmembrane transporter activity,antiporter activity,drug transmembrane transport,transmembrane transport,membrane	MULTIDRUG RESISTANCE PROTEIN|NA
Sobic.007G146200	Chr07	57595992	57601394	molecular_function,molecular_function,biological_process,cellular_component	enzyme inhibitor activity,pectinesterase activity,cell wall modification,cell wall	FAMILY NOT NAMED|PECTINESTERASE/PECTINESTERASE INHIBITOR 32-RELATED	STARCH_AND_SUCROSE_METABOLISM|PENTOSE_AND_GLUCURONATE_INTERCONVERSIONS
Sobic.002G137800	Chr02	21153582	21157635	NA,molecular_function,biological_process	NA,oxidoreductase activity,oxidation-reduction process	OXIDOREDUCTASE, 2OG-FE II OXYGENASE FAMILY PROTEIN|SUBFAMILY NOT NAMED
Sobic.004G339100	Chr04	67104883	67109555	NA,NA	NA,NA	DOMAIN OF UNKNOWN FUNCTION 71 DUF71 -CONTAINING PROTEIN	DIPHTHAMIDE_BIOSYNTHESIS_(ARCHAEA)|DIPHTHAMIDE_BIOSYNTHESIS_(EUKARYOTES)
Sobic.002G188200	Chr02	57264282	57277538	NA	NA	RING FINGER DOMAIN-CONTAINING|NA
Sobic.006G162200	Chr06	51991334	51992740	molecular_function,biological_process	oxidoreductase activity, acting on NAD(P)H, quinone or similar compound as acceptor,oxidation-reduction process	FAMILY NOT NAMED|NAD(P)H-QUINONE OXIDOREDUCTASE SUBUNIT M, CHLOROPLASTIC
Sobic.001G438800	Chr01	71687096	71690512	molecular_function	protein binding	BETA CATENIN-RELATED ARMADILLO REPEAT-CONTAINING|NA
Sobic.002G335900	Chr02	70382979	70385365	cellular_component,NA	nucleus,NA	CYCLINE|CYCLIN-D6-1-RELATED
Sobic.001G356000	Chr01	64546335	64547906	NA	NA	MYB-LIKE DNA-BINDING PROTEIN MYB|NA
Sobic.010G148800	Chr10	42829856	42831874	molecular_function,molecular_function,biological_process	transcription factor activity, sequence-specific DNA binding,sequence-specific DNA binding,regulation of transcription, DNA-templated	FAMILY NOT NAMED	PLANT-PATHOGEN_INTERACTION
Sobic.006G069500	Chr06	43250944	43252930	molecular_function,molecular_function,biological_process	electron carrier activity,protein disulfide oxidoreductase activity,cell redox homeostasis	GLUTAREDOXIN|NA
Sobic.010G250000	Chr10	58928662	58931250	molecular_function,biological_process,cellular_component,cellular_component,molecular_function,biological_process,cellular_component	structural constituent of ribosome,translation,intracellular,ribosome,structural constituent of ribosome,translation,ribosome	RIBOSOMAL PROTEIN L2|54S RIBOSOMAL PROTEIN RML2, MITOCHONDRIAL	RIBOSOME
Sobic.002G073700	Chr02	7653306	7659603	molecular_function,biological_process,molecular_function,biological_process	methyltransferase activity,metabolic process,methyltransferase activity,steroid biosynthetic process	METHYLTRANSFERASE|NA	STEROID_BIOSYNTHESIS
Sobic.007G145600	Chr07	57553940	57556333	NA,molecular_function,biological_process	NA,catalytic activity,metabolic process	FAMILY NOT NAMED|NA	UBIQUINONE_AND_OTHER_TERPENOID-QUINONE_BIOSYNTHESIS|PHENYLALANINE_METABOLISM|PHENYLPROPANOID_BIOSYNTHESIS
Sobic.003G280500	Chr03	61563437	61567044	NA,molecular_function,NA,molecular_function,molecular_function,molecular_function	NA,GTP binding,NA,GTP binding,GTPase activity,GTP binding	TRANSLATION FACTOR|NA
Sobic.008G004900	Chr08	452671	455534			FAMILY NOT NAMED|F10K1.23
Sobic.002G222500	Chr02	61411312	61414071	NA	NA	FAMILY NOT NAMED|SUBFAMILY NOT NAMED
Sobic.001G472301	Chr01	74474653	74476387
Sobic.001G463900	Chr01	73790038	73792997	NA	NA	N-TERMINAL ACETYLTRANSFERASE|NA
Sobic.004G283800	Chr04	62599054	62603155	molecular_function	methyltransferase activity	METHYLTRANSFERASE|NA
Sobic.010G180800	Chr10	52023606	52037400	NA,NA,NA,NA,molecular_function,molecular_function	NA,NA,NA,NA,protein binding,nucleic acid binding	EUKARYOTIC TRANSLATION INITIATION FACTOR 2C|NA
Sobic.007G103600	Chr07	31999643	32035305	NA	NA	APOPTOSIS INHIBITOR 5-RELATED|NA
Sobic.007G006300	Chr07	537027	541042			FAMILY NOT NAMED|NA
Sobic.003G291700	Chr03	62426982	62430664	NA,molecular_function,biological_process,molecular_function	NA,protein kinase activity,protein phosphorylation,protein binding	FAMILY NOT NAMED|NA

## Sheet: Table_6
Table 6: Synteny between Maize and sorghum for traits under study
S no	TraitName	Chromosome	LeftMarker	Chromosome	gene	Start	End	Gene id	chr	position in maize	Sequence similarity
14	NDM_S	Chr07	58298409	Chr07	CDS	58298134	58298777	Sobic.007G151100	1	207946160-207950205	98
37	NDM_16_S	Chr07	58298409	Chr07	CDS	58298134	58298777	Sobic.007G151100	1	207946160-207950205	98
1	DFL_S	Chr01	76467936	Chr01	CDS	76467583	76467941	Sobic.001G495200	1	12985602-12991686	97.3
11	TW_S	Chr03	66708552	Chr03	CDS	66707730	66709076	Sobic.003G346200	3	182539164-182543266	97.3
31	TW_16_S	Chr01	76467936	Chr01	CDS	76467583	76467941	Sobic.001G495200	1	12985602-12991686	97.3
21	ME_S	Chr02	69068634	Chr02	CDS	69068586	69069217	Sobic.002G318300	2	203912110-203915281	96.2
75	TW_16_C	Chr02	69068634	Chr02	CDS	69068586	69069217	Sobic.002G318300	2	203912110-203915281	96.2
5	PH_S	Chr07	58694851	Chr07	CDS	58693916	58695259	Sobic.007G153900	4	56335735-56340792	95.7
7	FW_S	Chr07	58694851	Chr07	CDS	58693916	58695259	Sobic.007G153900	4	56335735-56340792	95.7
25	PH_16_S	Chr07	58694851	Chr07	CDS	58693916	58695259	Sobic.007G153900	4	56335735-56340792	95.7
28	FW_16_S	Chr07	58694851	Chr07	CDS	58693916	58695259	Sobic.007G153900	4	56335735-56340792	95.7
50	PH_17_S	Chr07	58694851	Chr07	CDS	58693916	58695259	Sobic.007G153900	4	56335735-56340792	95.7
64	PH_C	Chr07	58694851	Chr07	CDS	58693916	58695259	Sobic.007G153900	4	56335735-56340792	95.7
66	DW_C	Chr07	58694851	Chr07	CDS	58693916	58695259	Sobic.007G153900	4	56335735-56340792	95.7
70	HI_C	Chr07	58694851	Chr07	CDS	58693916	58695259	Sobic.007G153900	4	56335735-56340792	95.7
80	PH_17_C	Chr07	58694851	Chr07	CDS	58693916	58695259	Sobic.007G153900	4	56335735-56340792	95.7
15	NDF_S	Chr02	61453155	Chr02	CDS	61452570	61453382	Sobic.002G223200	7	124720216-124722881	95.5
38	NDM_16_S	Chr01	71687167	Chr01	CDS	71687096	71689051	Sobic.001G438800	9	143252371-143254853	95.5
51	FW_17_S	Chr07	57555393	Chr07	CDS	57554868	57556077	Sobic.007G145600	1	2131442512-13146355	95.5
54	DW_17_S	Chr07	57555393	Chr07	CDS	57554868	57556077	Sobic.007G145600	1	2131442512-13146355	95.5
3	DFL_S	Chr10	10483314	Chr10	CDS	10483234	10484019	Sobic.010G107100	9	30656807-30659845	93.8
76	ADF_16_C	Chr10	10483314	Chr10	CDS	10483234	10484019	Sobic.010G107100	9	30656807-30659845	93.8
62	DFL_C	Chr10	52030111	Chr10	CDS	52029936	52030415	Sobic.010G180800	6	103286382-103293200	93.3
57	ADF_17_S	Chr02	61411614	Chr02	CDS	61411603	61412281	Sobic.002G222500	7	124599410-124605593	92.9
48	DFL_17_S	Chr06	43252501	Chr06	CDS	43251308	43252663	Sobic.006G069500	2	57694213-57695985	92.2
61	DFL_C	Chr04	62599717	Chr04	CDS	62599232	62600017	Sobic.004G283800	4	155320837-155324867	91.7
77	DFL_17_C	Chr04	62599717	Chr04	CDS	62599232	62600017	Sobic.004G283800	4	155320837-155324867	91.7
35	TW_16_S	Chr06	51991776	Chr06	CDS	51991489	51991968	Sobic.006G162200	2	22816325-22817791	90.8
36	TW_16_S	Chr06	51991776	Chr06	CDS	51991489	51991968	Sobic.006G162200	2	22816325-22817791	90.8
12	TW_S	Chr03	70885077	Chr03	CDS	70884544	70885434	Sobic.003G400200	3	162138015-162139431	90.2
56	PW_17_S	Chr08	452946	Chr08	CDS	452860	453091	Sobic.008G004900	4	183788474-183790392	90
39	NDM_16_S	Chr02	70384142	Chr02	CDS	70384025	70384155	Sobic.002G335900	7	156705728-156708177	89.5
41	ADF_16_S	Chr02	70384142	Chr02	CDS	70384025	70384155	Sobic.002G335900	7	156705728-156708177	89.5
44	ME_16_S	Chr02	70384142	Chr02	CDS	70384025	70384155	Sobic.002G335900	7	156705728-156708177	89.5
46	IVOMD_16_S	Chr02	70384142	Chr02	CDS	70384025	70384155	Sobic.002G335900	7	156705728-156708177	89.5
53	DW_17_S	Chr03	61565073	Chr03	CDS	61563609	61565651	Sobic.003G280500	1	296340875-296345856	89
82	DW_17_C	Chr03	61565073	Chr03	CDS	61563609	61565651	Sobic.003G280500	1	296340875-296345856	89
10	TW_S	Chr02	64671795	Chr02	CDS	64671313	64671975	Sobic.002G261500	2	197786006-197786668	87.7
33	TW_16_S	Chr02	64671795	Chr02	CDS	64671313	64671975	Sobic.002G261500	2	197786006-197786668	87.7
68	TW_C	Chr02	64671795	Chr02	CDS	64671313	64671975	Sobic.002G261500	2	197786006-197786668	87.7
60	IVOMD_17_S	Chr01	73791442	Chr01	CDS	73791401	73792265	Sobic.001G463900	1	21588499-21590271	86.7
13	TW_S	Chr04	59500521	Chr04	CDS	59500465	59500550	Sobic.004G247400	4	167068633-167070463	86.5
34	TW_16_S	Chr04	59500521	Chr04	CDS	59500465	59500550	Sobic.004G247400	4	167068633-167070463	86.5
42	ADL_16_S	Chr01	64547158	Chr01	CDS	64546583	64547409	Sobic.001G356000	9	119563181-19564683	85.6
43	ME_16_S	Chr01	64547158	Chr01	CDS	64546583	64547409	Sobic.001G356000	9	119563181-19564683	85.6
8	FW_S	Chr07	59366675	Chr07	CDS	59366065	59367393	Sobic.007G159000	9	113083356-113087396	83.9
9	DW_S	Chr07	59366675	Chr07	CDS	59366065	59367393	Sobic.007G159000	9	113083356-113087396	83.9
26	PH_16_S	Chr07	59366675	Chr07	CDS	59366065	59367393	Sobic.007G159000	9	113083356-113087396	83.9
29	FW_16_S	Chr07	59366675	Chr07	CDS	59366065	59367393	Sobic.007G159000	9	113083356-113087396	83.9
30	DW_16_S	Chr07	59366675	Chr07	CDS	59366065	59367393	Sobic.007G159000	9	113083356-113087396	83.9
52	FW_17_S	Chr07	59366675	Chr07	CDS	59366065	59367393	Sobic.007G159000	9	113083356-113087396	83.9
55	DW_17_S	Chr07	59366675	Chr07	CDS	59366065	59367393	Sobic.007G159000	9	113083356-113087396	83.9
65	FW_C	Chr07	59366675	Chr07	CDS	59366065	59367393	Sobic.007G159000	9	113083356-113087396	83.9
67	DW_C	Chr07	59366675	Chr07	CDS	59366065	59367393	Sobic.007G159000	9	113083356-113087396	83.9
71	HI_C	Chr07	59366675	Chr07	CDS	59366065	59367393	Sobic.007G159000	9	113083356-113087396	83.9
73	PH_16_C	Chr07	59366675	Chr07	CDS	59366065	59367393	Sobic.007G159000	9	113083356-113087396	83.9
81	FW_17_C	Chr07	59366675	Chr07	CDS	59366065	59367393	Sobic.007G159000	9	113083356-113087396	83.9
83	DW_17_C	Chr07	59366675	Chr07	CDS	59366065	59367393	Sobic.007G159000	9	113083356-113087396	83.9
4	PH_S	Chr07	56368290	Chr07	CDS	56368193	56368485	Sobic.007G136300	1	217232037-217233847	83.2
6	FW_S	Chr07	56368290	Chr07	CDS	56368193	56368485	Sobic.007G136300	1	217232037-217233847	83.2
24	PH_16_S	Chr07	56368290	Chr07	CDS	56368193	56368485	Sobic.007G136300	1	217232037-217233847	83.2
27	FW_16_S	Chr07	56368290	Chr07	CDS	56368193	56368485	Sobic.007G136300	1	217232037-217233847	83.2
49	PH_17_S	Chr07	56368290	Chr07	CDS	56368193	56368485	Sobic.007G136300	1	217232037-217233847	83.2
69	HI_C	Chr07	56368290	Chr07	CDS	56368193	56368485	Sobic.007G136300	1	217232037-217233847	83.2
72	PH_16_C	Chr07	56368290	Chr07	CDS	56368193	56368485	Sobic.007G136300	1	217232037-217233847	83.2
79	PH_17_C	Chr07	56368290	Chr07	CDS	56368193	56368485	Sobic.007G136300	1	217232037-217233847	83.2
85	VGI_17_C	Chr03	62430521	Chr03	CDS	62430207	62430664	Sobic.003G291700	3	199347795-199351308	81.3
16	NDF_S	Chr02	71485265	Chr02	CDS	71484494	71485759	Sobic.002G350600	7	160472018-160481840	80.7
32	TW_16_S	Chr02	57265544	Chr02	CDS	57264823	57266049	Sobic.002G188200	7	103333159-103334928	80.4
74	TW_16_C	Chr02	57265544	Chr02	CDS	57264823	57266049	Sobic.002G188200	7	103333159-103334928	80.4
18	NDF_S	Chr08	2392981	Chr08	CDS	2392693	2393670	Sobic.008G026400	2	152099574-152101867	80.3
22	IVOMD_S	Chr08	2392981	Chr08	CDS	2392693	2393670	Sobic.008G026400	2	152099574-152101867	80.3
58	ME_17_S	Chr08	2392981	Chr08	CDS	2392693	2393670	Sobic.008G026400	2	152099574-152101867	80.3
2	DFL_S	Chr07	63503859	Chr07	CDS	63503789	63504015	Sobic.007G204400	1	190222622-190223576	79.2
19	ADL_S	Chr01	64479483	Chr01	CDS	64479396	64479781	Sobic.001G354800	1	66775695-66776958	75.5
20	ME_S	Chr01	64479483	Chr01	CDS	64479396	64479781	Sobic.001G354800	1	66775695-66776958	75.5
45	IVOMD_16_S	Chr01	64479483	Chr01	CDS	64479396	64479781	Sobic.001G354800	1	66775695-66776958	75.5
17	NDF_S	Chr07	2559963	Chr07	CDS	2559685	2560012	Sobic.007G028500	4	35907120-35908997	74.6
40	NDM_16_S	Chr07	2559963	Chr07	CDS	2559685	2560012	Sobic.007G028500	4	35907120-35908997	74.6
47	DFL_17_S	Chr10	42831404	Chr10	CDS	42831240	42831622	Sobic.010G148800	8	13139079-13140882	74.3
63	DFL_C	Chr10	42831404	Chr10	CDS	42831240	42831622	Sobic.010G148800	8	13139079-13140882	74.3
78	DFL_17_C	Chr10	42831404	Chr10	CDS	42831240	42831622	Sobic.010G148800	8	13139079-13140882	74.3
23	DFL_16_S	Chr02	21156574	Chr02	CDS	21156520	21156774	Sobic.002G137800	1	204330466-204332651	74.1
59	IVOMD_17_S	Chr01	74475248	Chr01	CDS	74475201	74475489	Sobic.001G472301	1	25103399-25107137	47.5
84	GW_17_C	Chr07	539726	Chr07	CDS	537785	540155	Sobic.007G006300	1	61461100-61468546	32.8
